# Supplementary material for: Rescuable sleep and synaptogenesis phenotypes in a Drosophila model of O-GlcNAc transferase intellectual disability
Source: eLife. 2024 Nov 13;13:e90376. doi: 10.7554/eLife.90376 (PMC11623933; doi:10.7554/eLife.90376)
Supplement: Figure 1—figure supplement 1—source data 1. [file elife-90376-fig1-figsupp1-data1.xlsx]

## Sheet: Supplement 1A
Genotype	3b	4b	5b	6b
WT	2	520	43	1
CY	0	238	91	15

## Sheet: Supplement 1B
Genotype	-1	0	1	2
w1118	0	127	9	0
C941Y (CD21)	1	96	24	2
C941Y;OGAKO	1	9	33	40
OGAKO	0	86	5	1
