# Supplementary material for: Rescuable sleep and synaptogenesis phenotypes in a Drosophila model of O-GlcNAc transferase intellectual disability
Source: eLife. 2024 Nov 13;13:e90376. doi: 10.7554/eLife.90376 (PMC11623933; doi:10.7554/eLife.90376)
Supplement: Figure 1—source data 1. [file elife-90376-fig1-data1.xlsx]

## Sheet: 1A_raw_data
Genotype	RL2	OGT
w1118	0.900063	0.886715
w1118	1.09994	1.11329
w1118	1.09159	0.753664
w1118	0.974039	1.13656
w1118	0.934371	1.10978
w1118	1.24048	1
w1118	0.880537	0.922428
w1118	0.878987	1.07757
N595K	0.620151	1.18236
N595K	0.699188	1.2217
N595K	0.55963	0.864857
N595K	0.79907	1.14497
N595K	0.884098	1.59861
N595K	1.63848	1.15977
N595K	1.07591	0.877052
N595K	0.740335	0.797399
C941Y	0.422082	1.52382
C941Y	0.523721	1.90136
C941Y	0.398231	2.29147
C941Y	0.457657	1.39319
C941Y	0.52365	1.56306
C941Y	0.436293	1.76587
C941Y	0.469187	1.21921
C941Y	0.319855	1.09277

## Sheet: 1B_raw_data
Image Name	Name	RL2	OGT
E1	WT	0.788234	0.91613
E1	WT	1.24011	0.865396
E1	WT	0.971656	1.21847
E1	CY	0.681957	1.87992
E1	CY	0.829443	1.62054
E1	CY	0.66038	2.2763
E1	KM	0.854243	1.50547
E1	KM	0.8539	1.72462
E1	KM	0.808094	1.15013
E2	WT		0.821591
E2	WT	0.973582	0.81251
E2	WT	1.02642	1.3659
E2	CY	0.430409	1.61659
E2	CY	0.448193	1.91894
E2	CY	0.660802	3.21977
E2	KM	0.556356	2.35607
E2	KM	0.450377	1.66486
E2	KM	0.506826	1.72356

## Sheet: 1C_raw_data
Genotype	RL2	OGT
WT	0.966742	0.992331
WT	0.888841	0.897707
WT	1.14442	1.10996
CY	0.542486	1.31315
CY	0.423231	1.71226
KM	0.262349	11.2004
KM	0.194159	9.04112
KM	0.15248	8.3105
WT	0.977766	0.939364
WT	1.10109	1.0066
WT	0.921145	1.05403
CY	0.476392	1.06871
CY	0.363387	0.983635
CY	0.474486	1.43079
KM	0.194286	7.66047
KM	0.20936	6.89811
KM	0.18148	7.68384
