# Supplementary material for: Rescuable sleep and synaptogenesis phenotypes in a Drosophila model of O-GlcNAc transferase intellectual disability
Source: eLife. 2024 Nov 13;13:e90376. doi: 10.7554/eLife.90376 (PMC11623933; doi:10.7554/eLife.90376)
Supplement: Figure 3—figure supplement 1—source data 1. [file elife-90376-fig3-figsupp1-data1.xlsx]

## Sheet: NMJ_parameters_with_muscle_area
Repeat	Larvae	Genotype	Area	Perimeter	Boutons	Length	Longest branch length	Branches	Branching points	Islands	Muscle Area
1	1	K872M	129.883	105.306	7	42.5525	42.5525	1	0	1	33019
1	1	K872M	146.466	133.263	9	52.2346	52.2346	2	0	2	37219.6
1	2	K872M	161.599	182.376	12	80.0216	70.0992	5	2	1	41338.5
1	2	K872M	189.551	201.918	14	80.3836	75.5355	3	1	1	28948.5
1	2	K872M	140.233	144.864	10	48.7691	48.7691	3	0	3	28207.5
1	2	K872M	201.195	204.194	17	74.2538	58.2134	5	2	1	30665.2
1	2	K872M	170.773	173.409	15	67.6461	67.6461	3	0	3	29188.8
1	2	K872M	129.804	124.768	9	52.5253	43.081	3	1	1	22715.7
1	3	K872M	181.122	200.62	15	84.6377	84.6377	2	0	2	33705
1	3	K872M	167.166	204.085	11	75.5331	75.5331	1	0	1	27721.1
1	4	K872M	168.93	173.789	13	72.6334	61.9133	3	1	1	28421.9
1	4	K872M	106.517	93.686	6	39.1385	37.4725	3	1	1	28284.1
1	4	K872M	117.534	116.843	8	41.5227	37.7947	4	1	2	23556.3
1	4	K872M	107.811	101.054	7	37.6365	37.6365	1	0	1	21605.1
1	4	K872M	117.494	109.466	8	44.1108	32.0585	3	1	1	27364.9
1	5	K872M	171.87	190.465	15	72.698	72.698	4	0	4	34552.3
1	5	K872M	227.54	198.705	12	82.6577	50.7947	5	2	1	44528.6
1	5	K872M	161.364	130.683	9	54.4548	48.3848	3	1	1	31615.9
1	5	K872M	152.856	170.251	13	71.675	71.675	2	0	2	32661.4
1	6	K872M	158.071	199.209	13	77.0433	76.4493	6	1	4	26223.7
1	6	K872M	120.121	129.455	9	55.7588	55.7588	2	0	2	29143.8
1	6	K872M	200.489	175.424	13	76.4095	65.8253	3	1	1	38316.8
1	6	K872M	162.461	165.895	12	68.459	68.459	2	0	2	31877.3
1	7	K872M	136.352	151.308	13	65.0672	65.0672	1	0	1	30853.8
1	7	K872M	155.091	152.652	9	71.3236	57.2093	3	1	1	30681.4
1	1	w1118	177.516	193.141	11	66.7895	66.7895	3	0	3	45082
1	1	w1118	217.073	209.781	13	80.2875	63.7492	7	3	1	37711.8
1	1	w1118	199.47	154.196	11	50.8908	46.0908	4	1	2	44161.9
1	2	w1118	266.078	238.747	18	104.897	104.897	2	0	2	36622.2
1	2	w1118	262.236	257.918	18	105.269	103.835	4	1	2	28801.1
1	2	w1118	254.512	233.843	21	98.3982	92.9221	3	1	1	31003.1
1	2	w1118	238.831	205.878	15	75.6855	63.5114	3	1	1	33188
1	3	w1118	290.894	271.183	20	96.97	95.3039	6	1	4	38034.4
1	3	w1118	289.874	232.414	17	101.356	88.5263	3	1	1	44407.9
1	3	w1118	329.078	305.874	19	142.459	142.459	2	0	2	37140.2
1	4	w1118	248.671	226.118	17	91.8161	82.8639	4	1	2	35421.6
1	4	w1118	258.237	223.046	19	93.734	86.5158	3	1	1	34218.1
1	4	w1118	251.533	223.053	20	91.8055	87.3675	4	1	2	31922.2
1	5	w1118	228.951	238.65	19	100.348	97.9575	3	1	1	32080.2
1	5	w1118	331.901	274.796	17	114.237	113.363	5	1	3	42228.9
1	5	w1118	249.573	213.541	16	86.1455	67.401	6	2	2	43793.3
1	5	w1118	363.303	332.775	24	148.554	118.278	5	2	1	36403.9
1	5	w1118	303.753	259.062	19	110.17	102.83	4	1	2	46907.8
1	5	w1118	260.079	237.039	18	98.9325	71.7958	6	2	2	49139.5
1	6	w1118	286.268	239.385	17	92.8435	92.8435	3	0	3	45155.7
1	6	w1118	259.57	242.078	16	107.026	96.3536	3	1	1	37722.3
1	6	w1118	250.278	231.097	14	90.0458	90.0458	3	0	3	47389.3
1	6	w1118	155.718	140.188	10	55.8199	55.8199	1	0	1	40680.7
2	1	w1118	222.169	228.745	18	97.661	97.661	2	0	2	33750.9
2	1	w1118	330.921	357.236	26	161.718	161.718	2	0	2	27212.7
2	1	w1118	255.649	251.283	18	116.633	82.0006	5	2	1	35721.3
2	1	w1118	265.568	209.357	14	91.4963	91.4963	1	0	1	37020.5
2	2	w1118	226.756	244.762	15	111.966	111.966	2	0	2	27670.4
2	2	w1118	209.389	202.229	16	91.2139	75.7277	5	2	1	30716.9
2	2	w1118	198.725	171.596	15	69.8954	65.2793	4	1	2	29697.2
2	3	w1118	237.733	227.618	19	101.578	88.3715	3	1	1	27293.1
2	3	w1118	202.841	171.237	11	67.1516	67.1516	2	0	2	25413.7
2	3	w1118	285.405	226.206	15	95.188	79.1757	7	3	1	32069.7
2	3	w1118	214.799	223.31	17	98.5117	73.3551	5	2	1	27346.7
2	3	w1118	141.566	141.012	9	52.3812	42.8548	4	1	2	36633.7
2	3	K872M	198.764	195.545	13	85.2001	85.2001	2	0	2	43193.9
2	3	K872M	171.831	160.48	11	69.5416	54.8392	3	1	1	40114.9
2	3	K872M	177.516	166.361	9	58.1513	58.1513	2	0	2	43374.9
2	3	K872M	148.191	152.6	10	44.9989	44.6029	4	1	2	26629.6
2	4	K872M	213.662	162.868	8	64.9454	64.9454	2	0	2	40534.2
2	4	K872M	157.482	129.732	8	44.4189	44.4189	1	0	1	28805.9
2	5	K872M	204.919	215.962	13	95.318	92.662	4	1	2	35844.8
2	5	K872M	187.591	210.873	14	81.1076	80.7116	4	1	2	39391.1
2	5	K872M	177.712	195.05	14	80.222	69.3577	4	1	2	37900.4
2	5	K872M	250.082	244.119	18	98.7029	83.0046	5	1	3	34759.1
2	6	K872M	165.441	143.552	9	59.4553	47.6068	5	2	1	36979.3
2	6	K872M	216.092	199.966	16	79.8342	66.3877	5	1	3	31633.1
2	6	K872M	147.172	116.415	8	47.1968	36.2985	5	2	1	29631.1
2	6	K872M	177.045	153.197	11	59.6499	53.9957	4	1	2	32141.5
2	6	K872M	205.664	161.451	10	62.1909	62.1909	2	0	2	36047.8
2	6	K872M	225.619	205.357	14	78.4235	77.0715	4	1	2	39621.8

## Sheet: H596F_NMJ_parameters
Genotype	Image	Repeat	Larvae	Area	Perimiter	Boutons	Length	LongestBranch	Branches	Branching	Islands	QualityCheck
H596F	'flatstack_H596F_Dlg1_488_HRP_647 x63 larvae1_left1_2022_03_22__15_33_00.tif'	1	1	246.162	193.373	14	83.7918	83.7918	1	0	1	1
H596F	'flatstack_H596F_Dlg1_488_HRP_647 x63 larvae1_left3_2022_03_22__15_37_55.tif'	1	1	226.599	186.793	14	80.8922	51.8633	5	2	1	1
H596F	'flatstack_H596F_Dlg1_488_HRP_647 x63 larvae1_right1_2022_03_22__15_40_31.tif'	1	1	258.55	217.002	16	86.2357	86.2357	2	0	2	1
H596F	'flatstack_H596F_Dlg1_488_HRP_647 x63 larvae1_right2_2022_03_22__15_43_09.tif'	1	1	300.655	274.684	19	108.414	99.196	4	1	3	1
H596F	'flatstack_H596F_Dlg1_488_HRP_647 x63 larvae1_right3_2022_03_22__15_45_25.tif'	1	1	238.439	175.755	11	69.1689	69.1689	2	0	2	1
H596F	'flatstack_H596F_Dlg1_488_HRP_647 x63 larvae2_left1_2022_03_22__15_22_39.tif'	1	2	253.885	258.174	19	116.75	115.678	4	1	2	1
H596F	'flatstack_H596F_Dlg1_488_HRP_647 x63 larvae2_right1_2022_03_22__15_25_41.tif'	1	2	286.895	235.886	16	95.5054	95.5054	2	0	2	1
H596F	'flatstack_H596F_Dlg1_488_HRP_647 x63 larvae2_right2_2022_03_22__15_28_45.tif'	1	2	342.917	325.703	23	136.016	131.188	5	1	3	1
H596F	'flatstack_H596F_Dlg1_488_HRP_647 x63 larvae3_left1_2022_03_22__15_05_23.tif'	1	3	203.822	171.529	13	72.9474	69.8134	3	1	1	1
H596F	'flatstack_H596F_Dlg1_488_HRP_647 x63 larvae3_left2_2022_03_22__15_07_56.tif'	1	3	252.474	195.141	13	74.1296	74.1296	2	0	2	1
H596F	'flatstack_H596F_Dlg1_488_HRP_647 x63 larvae3_left3_2022_03_22__15_10_40.tif'	1	3	261.491	245.978	18	100.817	100.817	2	0	2	1
H596F	'flatstack_H596F_Dlg1_488_HRP_647 x63 larvae3_right1_2022_03_22__15_13_06.tif'	1	3	210.447	214.846	15	67.9178	60.6937	4	1	2	1
H596F	'flatstack_H596F_Dlg1_488_HRP_647 x63 larvae3_right2_2022_03_22__15_16_19.tif'	1	3	217.582	190.24	13	84.6634	84.6634	1	0	1	1
H596F	'flatstack_H596F_Dlg1_488_HRP_647 x63 larvae3_right3_2022_03_22__15_19_41.tif'	1	3	259.687	211.866	14	92.7183	81.0819	3	1	1	1
H596F	'flatstack_H596F_Dlg1_488_HRP_647 x63 larvae5_left1_2022_03_22__14_51_20.tif'	1	5	305.517	338.391	20	146.744	138.496	4	1	3	1
H596F	'flatstack_H596F_Dlg1_488_HRP_647 x63 larvae5_right1_2022_03_22__14_55_53.tif'	1	5	247.652	254.847	19	104.757	82.332	6	2	2	1
H596F	'flatstack_H596F_Dlg1_488_HRP_647 x63 larvae5_right3_2022_03_22__15_02_02.tif'	1	5	235.694	187.677	14	80.8558	80.8558	1	0	1	1
H596F	'flatstack_H596F_Dlg1_488_HRP_647 x63 larvae6_left1_2022_03_22__14_36_37.tif'	1	6	295.716	235.959	16	93.9742	93.9742	2	0	2	1
H596F	'flatstack_H596F_Dlg1_488_HRP_647 x63 larvae6_left2_2022_03_22__14_40_08.tif'	1	6	215.308	211.798	13	84.2499	71.9036	3	1	1	1
H596F	'flatstack_H596F_Dlg1_488_HRP_647 x63 larvae6_right1_2022_03_22__14_44_58.tif'	1	6	253.571	216.954	17	93.9684	61.8793	5	2	1	1
H596F	'flatstack_H596F_Dlg1_488_HRP_647 x63 larvae6_right2_2022_03_22__14_47_42.tif'	1	6	180.887	177.821	14	63.1717	63.1717	1	0	1	1
H596F	'flatstack_H596F_Dlg1_488_HRP_647 x63 larvae7_left1_2022_03_22__14_21_09.tif'	1	7	268.508	239.71	20	101.982	79.7896	5	2	1	1
H596F	'flatstack_H596F_Dlg1_488_HRP_647 x63 larvae7_left2_2022_03_22__14_24_05.tif'	1	7	231.852	178.819	10	78.4866	78.4866	1	0	1	1
H596F	'flatstack_H596F_Dlg1_488_HRP_647 x63 larvae7_right2_2022_03_22__14_31_25.tif'	1	7	317.004	263.788	20	108.62	84.9939	5	2	1	1
H596F	'flatstack_H596F_Dlg1_488_HRP_647 x63 larvae7_right3_2022_03_22__14_33_49.tif'	1	7	185.121	136.3	8	55.439	50.7549	3	1	1	1
WT	'flatstack_w1118_Dlg1_488_HRP_647 x63 larvae1_left1_2022_03_22__15_58_13.tif'	1	1	295.245	204.766	16	83.8563	83.8563	2	0	2	1
WT	'flatstack_w1118_Dlg1_488_HRP_647 x63 larvae1_left2_2022_03_22__16_00_55.tif'	1	1	311.907	236.37	14	105.136	105.136	1	0	1	1
WT	'flatstack_w1118_Dlg1_488_HRP_647 x63 larvae1_left3_2022_03_22__16_03_04.tif'	1	1	273.683	239.43	16	105.612	102.347	3	1	1	1
WT	'flatstack_w1118_Dlg1_488_HRP_647 x63 larvae1_right1_2022_03_22__15_51_06.tif'	1	1	319.905	281.132	25	121.521	118.175	4	1	2	1
WT	'flatstack_w1118_Dlg1_488_HRP_647 x63 larvae1_right2_2022_03_22__15_53_22.tif'	1	1	363.931	283.631	17	122.384	122.384	1	0	1	1
WT	'flatstack_w1118_Dlg1_488_HRP_647 x63 larvae1_right3_2022_03_22__15_55_25.tif'	1	1	313.554	236.022	15	99.7478	70.3312	3	1	1	1
WT	'flatstack_w1118_Dlg1_488_HRP_647 x63 larvae2_left2_2022_03_22__16_20_48.tif'	1	2	273.566	276.016	22	116.419	97.332	6	2	2	1
WT	'flatstack_w1118_Dlg1_488_HRP_647 x63 larvae2_left3_2022_03_22__16_23_37.tif'	1	2	293.52	234.318	18	102.794	84.4736	7	3	1	1
WT	'flatstack_w1118_Dlg1_488_HRP_647 x63 larvae2_right3_2022_03_22__16_15_39.tif'	1	2	249.298	194.066	17	72.3816	72.3816	2	0	2	1
WT	'flatstack_w1118_Dlg1_488_HRP_647 x63 larvae3_left1_2022_03_22__16_34_23.tif'	1	3	256.551	168.157	11	55.1274	55.1274	3	0	3	1
WT	'flatstack_w1118_Dlg1_488_HRP_647 x63 larvae3_left2_2022_03_22__16_36_32.tif'	1	3	337.35	242.159	19	99.1644	86.1561	4	1	2	1
WT	'flatstack_w1118_Dlg1_488_HRP_647 x63 larvae2_right1_stiched_2022_03_22__16_07_26.tif.tif'	1	3	225.815	320.971	19	146.721	134.669	9	2	5	1
WT	'flatstack_w1118_Dlg1_488_HRP_647 x63 larvae3_right1_2022_03_22__16_26_31.tif'	1	3	287.287	259.715	20	100.452	100.452	2	0	2	1
WT	'flatstack_w1118_Dlg1_488_HRP_647 x63 larvae3_right2_2022_03_22__16_29_17.tif'	1	3	328.922	350.515	23	145.401	133.821	6	2	2	1
WT	'flatstack_w1118_Dlg1_488_HRP_647 x63 larvae3_right3_2022_03_22__16_31_23.tif'	1	3	343.897	319.713	22	137.151	118.769	6	2	2	1
WT	'flatstack_w1118_Dlg1_488_HRP_647 x63 larvae4_left1_2022_03_22__16_54_48.tif'	1	4	303.125	291.143	22	133.373	124.537	5	2	1	1
WT	'flatstack_w1118_Dlg1_488_HRP_647 x63 larvae4_right1_2022_03_22__16_46_52.tif'	1	4	344.094	331.233	21	147.942	142.534	5	2	1	1
WT	'flatstack_w1118_Dlg1_488_HRP_647 x63 larvae4_right2_2022_03_22__16_49_11.tif'	1	4	335.116	324.42	24	133.879	124.339	4	1	2	1
WT	'flatstack_w1118_Dlg1_488_HRP_647 x63 larvae4_right3_2022_03_22__16_51_34.tif'	1	4	266.038	267.562	19	110.502	103.926	6	2	2	1
WT	'flatstack_w1118_Dlg1_488_HRP_647 x63 larvae5_left1_2022_03_22__17_10_47.tif'	1	5	299.401	221.265	12	95.2161	70.9194	5	2	1	1
WT	'flatstack_w1118_Dlg1_488_HRP_647 x63 larvae5_left2_2022_03_22__17_12_31.tif'	1	5	306.497	228.486	14	81.7215	81.7215	3	0	3	1
WT	'flatstack_w1118_Dlg1_488_HRP_647 x63 larvae5_left3_2022_03_22__17_14_14.tif'	1	5	295.167	265.68	20	105.192	77.3597	9	3	3	1
WT	'flatstack_w1118_Dlg1_488_HRP_647 x63 larvae5_right1_2022_03_22__16_57_28.tif'	1	5	307.046	238.794	18	93.1036	93.1036	2	0	2	1
H596F	'flatstack_H596F_Dlg1_488_HRP_647 x63 larvae3_left2_2022_04_07__17_49_10.tif'	2	3	208.252	232.403	14	74.8537	61.8395	4	1	2	1
H596F	'flatstack_H596F_Dlg1_488_HRP_647 x63 larvae1_left1_2022_04_07__17_23_59.tif'	2	1	311.123	307.076	23	119.016	119.016	2	0	2	1
H596F	'flatstack_H596F_Dlg1_488_HRP_647 x63 larvae1_right1_2022_04_07__17_16_52.tif'	2	1	216.484	282.668	17	72.3675	72.3675	3	0	3	1
H596F	'flatstack_H596F_Dlg1_488_HRP_647 x63 larvae1_right2_2022_04_07__17_19_18.tif'	2	1	282.582	255.006	18	113.536	97.264	6	2	2	1
H596F	'flatstack_H596F_Dlg1_488_HRP_647 x63 larvae1_right3_2022_04_07__17_21_29.tif'	2	1	296.029	282.444	18	98.5365	98.5365	3	0	3	1
H596F	'flatstack_H596F_Dlg1_488_HRP_647 x63 larvae3_left1_2022_04_07__17_46_58.tif'	2	3	244.555	251.134	15	101.448	101.448	1	0	1	1
H596F	'flatstack_H596F_Dlg1_488_HRP_647 x63 larvae3_right2_2022_04_07__17_42_33.tif'	2	3	223.659	241.418	16	87.3369	87.3369	2	0	2	1
H596F	'flatstack_H596F_Dlg1_488_HRP_647 x63 larvae3_right3_2022_04_07__17_44_50.tif'	2	3	277.76	267.231	18	93.8418	90.5296	3	1	1	1
H596F	'flatstack_H596F_Dlg1_488_HRP_647 x63 larvae4_left1_2022_04_07__17_59_00.tif'	2	4	365.068	296.545	18	106.898	98.254	4	1	2	1
H596F	'flatstack_H596F_Dlg1_488_HRP_647 x63 larvae4_left2_2022_04_07__18_01_12.tif'	2	4	335.939	258.484	16	98.833	65.338	5	2	1	1
H596F	'flatstack_H596F_Dlg1_488_HRP_647 x63 larvae4_left3_2022_04_07__18_02_54.tif'	2	4	218.954	212.49	12	75.7699	75.7699	3	0	3	1
H596F	'flatstack_H596F_Dlg1_488_HRP_647 x63 larvae4_right1_2022_04_07__17_51_52.tif'	2	4	302.772	257.339	22	102.68	92.0282	4	1	2	1
H596F	'flatstack_H596F_Dlg1_488_HRP_647 x63 larvae4_right2_2022_04_07__17_54_20.tif'	2	4	242.516	168.929	10	54.8217	54.8217	3	0	3	1
H596F	'flatstack_H596F_Dlg1_488_HRP_647 x63 larvae4_right3_2022_04_07__17_56_19.tif'	2	4	279.25	280.667	21	118.026	97.2815	6	2	2	1
WT	'flatstack_w1118_Dlg1_488_HRP_647 x63 larvae1_left1_2022_04_07__16_59_50.tif'	2	1	302.694	243.754	19	108.306	88.504	4	1	2	1
WT	'flatstack_w1118_Dlg1_488_HRP_647 x63 larvae1_left2_2022_04_07__17_02_59.tif'	2	1	360.598	401.585	27	180.075	180.075	2	0	2	1
WT	'flatstack_w1118_Dlg1_488_HRP_647 x63 larvae1_right2_2022_04_07__17_10_15.tif'	2	1	286.816	214.121	12	91.4798	91.4798	2	0	2	1
WT	'flatstack_w1118_Dlg1_488_HRP_647 x63 larvae3_left2_2022_04_07__16_09_07.tif'	2	3	280.387	293.055	21	123.165	123.165	3	0	3	1
WT	'flatstack_w1118_Dlg1_488_HRP_647 x63 larvae3_right1_2022_04_07__16_15_26.tif'	2	3	288.11	240.122	16	83.6418	81.1358	5	1	3	1
WT	'flatstack_w1118_Dlg1_488_HRP_647 x63 larvae3_right2_2022_04_07__16_19_04.tif'	2	3	344.721	275.447	18	117.043	79.6702	5	2	1	1
WT	'flatstack_w1118_Dlg1_488_HRP_647 x63 larvae3_right3_2022_04_07__16_22_25.tif'	2	3	318.376	282.827	20	118.506	117.83	4	1	2	1
WT	'flatstack_w1118_Dlg1_488_HRP_647 x63 larvae4_left1_2022_04_07__15_45_26.tif'	2	4	378.162	309.679	20	131.252	131.252	1	0	2	1
WT	'flatstack_w1118_Dlg1_488_HRP_647 x63 larvae4_left2_2022_04_07__15_48_32.tif'	2	4	315.004	249.442	17	104.53	81.4837	6	2	2	1
WT	'flatstack_w1118_Dlg1_488_HRP_647 x63 larvae4_left3_2022_04_07__15_51_08.tif'	2	4	345.113	302.307	22	130.53	103.482	6	2	2	1
WT	'flatstack_w1118_Dlg1_488_HRP_647 x63 larvae4_right1_2022_04_07__15_54_56.tif'	2	4	320.375	250.382	21	110.516	71.4794	5	2	1	1
WT	'flatstack_w1118_Dlg1_488_HRP_647 x63 larvae4_right2_2022_04_07__15_58_17.tif'	2	4	301.126	260.431	17	101.58	96.2202	5	1	3	1
WT	'flatstack_w1118_Dlg1_488_HRP_647 x63 larvae6_left1_2022_04_07__15_13_49.tif'	2	6	313.358	266.851	19	120.027	120.027	1	0	1	1
WT	'flatstack_w1118_Dlg1_488_HRP_647 x63 larvae6_left2_2022_04_07__15_16_36.tif'	2	6	255.963	193.645	15	70.5151	59.3228	4	1	2	1
WT	'flatstack_w1118_Dlg1_488_HRP_647 x63 larvae6_right2_2022_04_07__15_23_29.tif'	2	6	337.782	246.519	17	101.039	85.9547	4	1	2	1
WT	'flatstack_w1118_Dlg1_488_HRP_647 x63 larvae6_right3_2022_04_07__15_26_54.tif'	2	6	226.717	227.586	16	108.813	94.5682	4	1	2	1
