# Supplementary material for: Rescuable sleep and synaptogenesis phenotypes in a Drosophila model of O-GlcNAc transferase intellectual disability
Source: eLife. 2024 Nov 13;13:e90376. doi: 10.7554/eLife.90376 (PMC11623933; doi:10.7554/eLife.90376)
Supplement: Figure 5—source data 2. [file elife-90376-fig5-data2.xlsx]

## Sheet: Total Activity
Rep	Group	Fly Number	Bin Length	24-hour bin	1st 12-hour bin	2nd 12-hour bin
3	OgaKO	Fly 1	12/24 Default	1276	729.667	546.333
3	OgaKO	Fly 2	12/24 Default	1593.67	970.667	623
3	OgaKO	Fly 3	12/24 Default	676.333	330.333	346
3	OgaKO	Fly 4	12/24 Default	998.333	590.667	407.667
3	OgaKO	Fly 5	12/24 Default	663.667	448	215.667
3	OgaKO	Fly 6	12/24 Default	2312.33	1225.67	1086.67
3	OgaKO	Fly 7	12/24 Default	477	239.667	237.333
3	OgaKO	Fly 8	12/24 Default	1446	767.333	678.667
3	OgaKO	Fly 9	12/24 Default	813.333	467.667	345.667
3	OgaKO	Fly 10	12/24 Default	1053.33	596.333	457
3	OgaKO	Fly 11	12/24 Default	879.333	374	505.333
3	OgaKO	Fly 12	12/24 Default	989.667	624.333	365.333
3	OgaKO	Fly 13	12/24 Default	986	609.667	376.333
3	OgaKO	Fly 14	12/24 Default	908.667	534.667	374
3	OgaKO	Fly 15	12/24 Default	932.333	725.333	207
3	OgaKO	Fly 16	12/24 Default	966	572	394
3	OgaKO	Fly 17	12/24 Default	753.667	461.667	292
3	OgaKO	Fly 18	12/24 Default	1157	662.333	494.667
3	OgaKO	Fly 19	12/24 Default	1413	652	761
3	OgaKO	Fly 20	12/24 Default	778	310	468
3	OgaKO	Fly 21	12/24 Default	1658.67	953.333	705.333
3	OgaKO	Fly 22	12/24 Default	422.333	251	171.333
3	OgaKO	Fly 23	12/24 Default	892.333	511.333	381
3	C941Y	Fly 1	12/24 Default	2328.33	1377.33	951
3	C941Y	Fly 2	12/24 Default	1708.33	1143.33	565
3	C941Y	Fly 3	12/24 Default	1521.67	787.333	734.333
3	C941Y	Fly 4	12/24 Default	1095.33	824.333	271
3	C941Y	Fly 5	12/24 Default	1681.33	1133	548.333
3	C941Y	Fly 6	12/24 Default	1242	943	299
3	C941Y	Fly 7	12/24 Default	1730.67	1250.33	480.333
3	C941Y	Fly 8	12/24 Default	1275	806.667	468.333
3	C941Y	Fly 9	12/24 Default	1423	853.667	569.333
3	C941Y	Fly 10	12/24 Default	976.333	618.667	357.667
3	C941Y	Fly 11	12/24 Default	1761	982.333	778.667
3	C941Y	Fly 12	12/24 Default	1254.67	700	554.667
3	C941Y	Fly 13	12/24 Default	1200	751	449
3	C941Y	Fly 14	12/24 Default	1286.33	839.333	447
3	C941Y	Fly 15	12/24 Default	1242.67	792.333	450.333
3	C941Y	Fly 16	12/24 Default	1629	738	891
3	C941Y	Fly 17	12/24 Default	1525.33	940.333	585
3	C941Y	Fly 18	12/24 Default	1428	915	513
3	C941Y	Fly 19	12/24 Default	1784	1038.67	745.333
3	C941Y	Fly 20	12/24 Default	2017.67	1409.33	608.333
3	C941Y	Fly 21	12/24 Default	1153	670.667	482.333
3	C941Y	Fly 22	12/24 Default	1188	772	416
3	C941Y	Fly 23	12/24 Default	1559.33	1023	536.333
3	WT	Fly 1	12/24 Default	458.333	253.333	205
3	WT	Fly 2	12/24 Default	1789.33	1301.33	488
3	WT	Fly 3	12/24 Default	1232	765.667	466.333
3	WT	Fly 4	12/24 Default	2161.33	1081.67	1079.67
3	WT	Fly 5	12/24 Default	1153	723.333	429.667
3	WT	Fly 6	12/24 Default	1084.67	793	291.667
3	WT	Fly 7	12/24 Default	1085	600.667	484.333
3	WT	Fly 8	12/24 Default	1242	805.667	436.333
3	WT	Fly 9	12/24 Default	726.333	561	165.333
3	WT	Fly 10	12/24 Default	925	670	255
3	WT	Fly 11	12/24 Default	1009.67	607.333	402.333
3	WT	Fly 12	12/24 Default	1667.67	946.333	721.333
3	WT	Fly 13	12/24 Default	1870.33	1210.33	660
3	WT	Fly 14	12/24 Default	1174.33	717.333	457
3	WT	Fly 15	12/24 Default	1100	419.667	680.333
3	WT	Fly 16	12/24 Default	1461.33	948.333	513
3	WT	Fly 17	12/24 Default	601	337.667	263.333
3	WT	Fly 18	12/24 Default	810	338	472
3	WT	Fly 19	12/24 Default	614	311.667	302.333
3	WT	Fly 20	12/24 Default	576.333	179	397.333
3	C941Y;OgaKO	Fly 1	12/24 Default	712.667	421	291.667
3	C941Y;OgaKO	Fly 2	12/24 Default	791.333	574.667	216.667
3	C941Y;OgaKO	Fly 3	12/24 Default	1443.33	936.667	506.667
3	C941Y;OgaKO	Fly 4	12/24 Default	947.667	640.667	307
3	C941Y;OgaKO	Fly 5	12/24 Default	453.667	260.333	193.333
3	C941Y;OgaKO	Fly 6	12/24 Default	963.333	661.667	301.667
3	C941Y;OgaKO	Fly 7	12/24 Default	611	461.667	149.333
3	C941Y;OgaKO	Fly 8	12/24 Default	894.667	624.667	270
3	C941Y;OgaKO	Fly 9	12/24 Default	1196	824.667	371.333
3	C941Y;OgaKO	Fly 10	12/24 Default	475.333	335	140.333
3	C941Y;OgaKO	Fly 11	12/24 Default	1107.67	700	407.667
3	C941Y;OgaKO	Fly 12	12/24 Default	912.667	644.333	268.333
3	C941Y;OgaKO	Fly 13	12/24 Default	768.333	448.667	319.667
3	C941Y;OgaKO	Fly 14	12/24 Default	1213.33	821.333	392
3	C941Y;OgaKO	Fly 15	12/24 Default	994	680.667	313.333
3	C941Y;OgaKO	Fly 16	12/24 Default	784	581	203
3	C941Y;OgaKO	Fly 17	12/24 Default	455.667	333.333	122.333
3	C941Y;OgaKO	Fly 18	12/24 Default	620	420	200
3	C941Y;OgaKO	Fly 19	12/24 Default	920	635.333	284.667
3	C941Y;OgaKO	Fly 20	12/24 Default	1006	592	414
3	C941Y;OgaKO	Fly 21	12/24 Default	552	437	115
3	C941Y;OgaKO	Fly 22	12/24 Default	896.333	576.667	319.667
2	WT	Fly 1	12/24 Default	1018	723.667	294.333
2	WT	Fly 2	12/24 Default	1649	793	856
2	WT	Fly 3	12/24 Default	717	515.333	201.667
2	WT	Fly 4	12/24 Default	886.667	654.333	232.333
2	WT	Fly 5	12/24 Default	607.667	401.667	206
2	WT	Fly 6	12/24 Default	1179	866.667	312.333
2	WT	Fly 7	12/24 Default	1436.33	904	532.333
2	WT	Fly 8	12/24 Default	1322	890.333	431.667
2	WT	Fly 9	12/24 Default	1321.67	930.333	391.333
2	WT	Fly 10	12/24 Default	1291.33	888.333	403
2	WT	Fly 11	12/24 Default	1671.67	1047.67	624
2	WT	Fly 12	12/24 Default	1337	1026	311
2	WT	Fly 13	12/24 Default	1324.67	968	356.667
2	WT	Fly 14	12/24 Default	907.333	588.333	319
2	WT	Fly 15	12/24 Default	1211.33	772	439.333
2	WT	Fly 16	12/24 Default	905.333	699	206.333
2	WT	Fly 17	12/24 Default	1344.67	806	538.667
2	WT	Fly 18	12/24 Default	1535	921.667	613.333
2	WT	Fly 19	12/24 Default	965.667	609	356.667
2	WT	Fly 20	12/24 Default	1747.67	1176	571.667
2	WT	Fly 21	12/24 Default	1748.67	829	919.667
2	WT	Fly 22	12/24 Default	1216.33	801	415.333
2	OgaKO	Fly 1	12/24 Default	985	511	474
2	OgaKO	Fly 2	12/24 Default	2019	914.667	1104.33
2	OgaKO	Fly 3	12/24 Default	1145	532.333	612.667
2	OgaKO	Fly 4	12/24 Default	2056	1141	915
2	OgaKO	Fly 5	12/24 Default	755	348.333	406.667
2	OgaKO	Fly 6	12/24 Default	875	592	283
2	OgaKO	Fly 7	12/24 Default	1441	667.667	773.333
2	OgaKO	Fly 8	12/24 Default	561.333	321	240.333
2	OgaKO	Fly 9	12/24 Default	2839	1781.67	1057.33
2	OgaKO	Fly 10	12/24 Default	1260.67	735.667	525
2	OgaKO	Fly 11	12/24 Default	1294.33	773.667	520.667
2	OgaKO	Fly 12	12/24 Default	1106	691.667	414.333
2	OgaKO	Fly 13	12/24 Default	1603	908.667	694.333
2	OgaKO	Fly 14	12/24 Default	399.333	295.667	103.667
2	OgaKO	Fly 15	12/24 Default	1977.67	1150.67	827
2	OgaKO	Fly 16	12/24 Default	1943.67	1230	713.667
2	OgaKO	Fly 17	12/24 Default	2999	1729	1270
2	OgaKO	Fly 18	12/24 Default	839	503	336
2	OgaKO	Fly 19	12/24 Default	1156	789	367
2	OgaKO	Fly 20	12/24 Default	1293	731	562
2	OgaKO	Fly 21	12/24 Default	1685	793.667	891.333
2	OgaKO	Fly 22	12/24 Default	1716.67	929.667	787
2	OgaKO	Fly 23	12/24 Default	1583.67	856	727.667
2	OgaKO	Fly 24	12/24 Default	1927.67	964.667	963
2	OgaKO	Fly 25	12/24 Default	1161.67	564.667	597
2	C941Y;OgaKO	Fly 1	12/24 Default	770	589.667	180.333
2	C941Y;OgaKO	Fly 2	12/24 Default	892	517.333	374.667
2	C941Y;OgaKO	Fly 3	12/24 Default	1181.67	631.667	550
2	C941Y;OgaKO	Fly 4	12/24 Default	1047	537	510
2	C941Y;OgaKO	Fly 5	12/24 Default	627	337.667	289.333
2	C941Y;OgaKO	Fly 6	12/24 Default	1091.33	789	302.333
2	C941Y;OgaKO	Fly 7	12/24 Default	1070.67	681.667	389
2	C941Y;OgaKO	Fly 8	12/24 Default	795	559.333	235.667
2	C941Y;OgaKO	Fly 9	12/24 Default	1460.67	768	692.667
2	C941Y;OgaKO	Fly 10	12/24 Default	1135	776.667	358.333
2	C941Y;OgaKO	Fly 11	12/24 Default	1364.67	963.667	401
2	C941Y;OgaKO	Fly 12	12/24 Default	651.667	281.333	370.333
2	C941Y;OgaKO	Fly 13	12/24 Default	751.667	496.667	255
2	C941Y;OgaKO	Fly 14	12/24 Default	2328.67	1348	980.667
2	C941Y;OgaKO	Fly 15	12/24 Default	733	547	186
2	C941Y;OgaKO	Fly 16	12/24 Default	1834.33	1095	739.333
2	C941Y;OgaKO	Fly 17	12/24 Default	1417.33	772	645.333
2	C941Y;OgaKO	Fly 18	12/24 Default	1140.33	781.333	359
2	C941Y	Fly 1	12/24 Default	1311.67	640.667	671
2	C941Y	Fly 2	12/24 Default	2252.33	1205	1047.33
2	C941Y	Fly 3	12/24 Default	1122	550	572
2	C941Y	Fly 4	12/24 Default	3585.67	1913	1672.67
2	C941Y	Fly 5	12/24 Default	2225.67	1051	1174.67
2	C941Y	Fly 6	12/24 Default	946	613	333
2	C941Y	Fly 7	12/24 Default	2316.33	1353	963.333
2	C941Y	Fly 8	12/24 Default	3157.67	1872.33	1285.33
2	C941Y	Fly 9	12/24 Default	1495.33	959.333	536
2	C941Y	Fly 10	12/24 Default	1496	933.667	562.333
2	C941Y	Fly 11	12/24 Default	2855.33	1533.67	1321.67
2	C941Y	Fly 12	12/24 Default	2170	1338.67	831.333
2	C941Y	Fly 13	12/24 Default	2013.67	1370.67	643
2	C941Y	Fly 14	12/24 Default	1112.33	766.333	346
2	C941Y	Fly 15	12/24 Default	1727	955.667	771.333
2	C941Y	Fly 16	12/24 Default	1819.67	1141	678.667
2	C941Y	Fly 17	12/24 Default	1265.67	840.667	425
2	C941Y	Fly 18	12/24 Default	1732.67	1014.33	718.333
2	C941Y	Fly 19	12/24 Default	1247.33	826	421.333
2	C941Y	Fly 20	12/24 Default	2074.67	1390.67	684
2	C941Y	Fly 21	12/24 Default	1710	1161.67	548.333
2	C941Y	Fly 22	12/24 Default	1969	1250.67	718.333
2	C941Y	Fly 23	12/24 Default	2130.67	1297	833.667
2	C941Y	Fly 24	12/24 Default	1131.33	698.333	433
2	C941Y	Fly 25	12/24 Default	3514.67	2245	1269.67
4	C941Y	Fly 1	12/24 Default	748	468.333	279.667
4	C941Y	Fly 2	12/24 Default	580	452.333	127.667
4	C941Y	Fly 3	12/24 Default	655.333	362	293.333
4	C941Y	Fly 4	12/24 Default	591.667	289.667	302
4	C941Y	Fly 5	12/24 Default	1678.67	1031	647.667
4	C941Y	Fly 6	12/24 Default	962	630.667	331.333
4	C941Y	Fly 7	12/24 Default	1452.33	958	494.333
4	C941Y	Fly 8	12/24 Default	1296.67	816	480.667
4	C941Y	Fly 9	12/24 Default	751	490	261
4	C941Y	Fly 10	12/24 Default	945.333	568.667	376.667
4	C941Y	Fly 11	12/24 Default	1166.33	765	401.333
4	C941Y	Fly 12	12/24 Default	303.667	176.667	127
4	C941Y	Fly 13	12/24 Default	831.333	527.333	304
4	C941Y	Fly 14	12/24 Default	1634.67	1125.33	509.333
4	C941Y	Fly 15	12/24 Default	649.333	449.333	200
4	C941Y	Fly 16	12/24 Default	967	704.333	262.667
4	C941Y	Fly 17	12/24 Default	1168	726	442
4	C941Y	Fly 18	12/24 Default	1050.67	719	331.667
4	C941Y	Fly 19	12/24 Default	632.333	430.333	202
4	C941Y	Fly 20	12/24 Default	759.667	526	233.667
4	C941Y	Fly 21	12/24 Default	1142.67	720.667	422
4	C941Y	Fly 22	12/24 Default	1536.67	1163.67	373
4	C941Y	Fly 23	12/24 Default	1099.67	738.333	361.333
4	C941Y	Fly 24	12/24 Default	394.667	229.667	165
4	C941Y	Fly 25	12/24 Default	1037.67	774	263.667
4	OgaKO	Fly 1	12/24 Default	1325.33	919.667	405.667
4	OgaKO	Fly 2	12/24 Default	1235.67	481.667	754
4	OgaKO	Fly 3	12/24 Default	757.333	486	271.333
4	OgaKO	Fly 4	12/24 Default	834.667	532.333	302.333
4	OgaKO	Fly 5	12/24 Default	1146	584.667	561.333
4	OgaKO	Fly 6	12/24 Default	1400.33	874	526.333
4	OgaKO	Fly 7	12/24 Default	1286	840	446
4	OgaKO	Fly 8	12/24 Default	2571.33	1155.33	1416
4	OgaKO	Fly 9	12/24 Default	1086.33	684.667	401.667
4	OgaKO	Fly 10	12/24 Default	1125.67	768	357.667
4	OgaKO	Fly 11	12/24 Default	2050.67	1259	791.667
4	OgaKO	Fly 12	12/24 Default	1148	775.667	372.333
4	OgaKO	Fly 13	12/24 Default	844.333	467	377.333
4	OgaKO	Fly 14	12/24 Default	1314	800.333	513.667
4	OgaKO	Fly 15	12/24 Default	1815.67	824.333	991.333
4	OgaKO	Fly 16	12/24 Default	957	564.333	392.667
4	OgaKO	Fly 17	12/24 Default	1885	933	952
4	OgaKO	Fly 18	12/24 Default	1848.67	1099.33	749.333
4	OgaKO	Fly 19	12/24 Default	1655.33	846	809.333
4	OgaKO	Fly 20	12/24 Default	751.667	576.667	175
4	OgaKO	Fly 21	12/24 Default	2645.33	1226.33	1419
4	OgaKO	Fly 22	12/24 Default	1023.67	669.333	354.333
4	OgaKO	Fly 23	12/24 Default	1157.67	647.667	510
4	OgaKO	Fly 24	12/24 Default	1125.33	708.333	417
4	OgaKO	Fly 25	12/24 Default	1446	934.333	511.667
4	WT	Fly 1	12/24 Default	1324.67	924.667	400
4	WT	Fly 2	12/24 Default	1573.67	1122.67	451
4	WT	Fly 3	12/24 Default	2204.67	1304.33	900.333
4	WT	Fly 4	12/24 Default	1218	837	381
4	WT	Fly 5	12/24 Default	1061.33	741.667	319.667
4	WT	Fly 6	12/24 Default	1255.67	816.333	439.333
4	WT	Fly 7	12/24 Default	1168.67	954	214.667
4	WT	Fly 8	12/24 Default	1257.33	815	442.333
4	WT	Fly 9	12/24 Default	1784.67	1154.67	630
4	WT	Fly 10	12/24 Default	1922	1229	693
4	WT	Fly 11	12/24 Default	1924	1058.33	865.667
4	WT	Fly 12	12/24 Default	1664.33	988.667	675.667
4	WT	Fly 13	12/24 Default	1349	923	426
4	WT	Fly 14	12/24 Default	1431.67	1030.33	401.333
4	WT	Fly 15	12/24 Default	1007.33	716.333	291
4	WT	Fly 16	12/24 Default	1345.33	891.333	454
4	WT	Fly 17	12/24 Default	1541.67	1127.33	414.333
4	WT	Fly 18	12/24 Default	1143.67	796	347.667
4	WT	Fly 19	12/24 Default	724.667	471	253.667
4	WT	Fly 20	12/24 Default	837.333	603.667	233.667
4	WT	Fly 21	12/24 Default	1126.67	746	380.667
4	WT	Fly 22	12/24 Default	905.667	620	285.667
4	WT	Fly 23	12/24 Default	1696.67	1325.33	371.333
4	WT	Fly 24	12/24 Default	889.333	608.667	280.667
4	WT	Fly 25	12/24 Default	1735.67	1080	655.667
4	WT	Fly 26	12/24 Default	1731	1153	578
4	C941Y;OgaKO	Fly 1	12/24 Default	763	604	159
4	C941Y;OgaKO	Fly 2	12/24 Default	1033	752	281
4	C941Y;OgaKO	Fly 3	12/24 Default	351	278.667	72.3333
4	C941Y;OgaKO	Fly 4	12/24 Default	659	467.333	191.667
4	C941Y;OgaKO	Fly 5	12/24 Default	554.333	439.667	114.667
4	C941Y;OgaKO	Fly 6	12/24 Default	937	535.667	401.333
4	C941Y;OgaKO	Fly 7	12/24 Default	621.333	529	92.3333
4	C941Y;OgaKO	Fly 8	12/24 Default	1006.67	775.333	231.333
4	C941Y;OgaKO	Fly 9	12/24 Default	861.667	621.667	240
4	C941Y;OgaKO	Fly 10	12/24 Default	673.667	528.333	145.333
4	C941Y;OgaKO	Fly 11	12/24 Default	630.667	519.667	111
4	C941Y;OgaKO	Fly 12	12/24 Default	1216	867.333	348.667
4	C941Y;OgaKO	Fly 13	12/24 Default	1887.33	1192.33	695
4	C941Y;OgaKO	Fly 14	12/24 Default	1211	851.333	359.667
4	C941Y;OgaKO	Fly 15	12/24 Default	647.667	406.667	241
4	C941Y;OgaKO	Fly 16	12/24 Default	801.667	694.667	107
4	C941Y;OgaKO	Fly 17	12/24 Default	715.667	491	224.667
5	C941Y	Fly 1	12/24 Default	841.333	524	317.333
5	C941Y	Fly 2	12/24 Default	1262.67	736.667	526
5	C941Y	Fly 3	12/24 Default	1635	964.333	670.667
5	C941Y	Fly 4	12/24 Default	1802.67	1187	615.667
5	C941Y	Fly 5	12/24 Default	937.333	645.333	292
5	C941Y	Fly 6	12/24 Default	865.667	677.333	188.333
5	C941Y	Fly 7	12/24 Default	925	607.667	317.333
5	C941Y	Fly 8	12/24 Default	1572.67	1051.67	521
5	C941Y	Fly 9	12/24 Default	1314.33	760.333	554
5	C941Y	Fly 10	12/24 Default	888.333	624	264.333
5	C941Y	Fly 11	12/24 Default	1207.67	729	478.667
5	C941Y	Fly 12	12/24 Default	1070.33	748.667	321.667
5	C941Y	Fly 13	12/24 Default	1163.67	695	468.667
5	C941Y	Fly 14	12/24 Default	1746.67	1217.67	529
5	C941Y	Fly 15	12/24 Default	1658.67	917	741.667
5	C941Y	Fly 16	12/24 Default	1240.33	838	402.333
5	C941Y	Fly 17	12/24 Default	1196	788.667	407.333
5	C941Y	Fly 18	12/24 Default	638.333	347.333	291
5	C941Y	Fly 19	12/24 Default	1229.33	805.667	423.667
5	C941Y	Fly 20	12/24 Default	740.667	575.333	165.333
5	C941Y	Fly 21	12/24 Default	1214	665.667	548.333
5	OgaKO	Fly 1	12/24 Default	915.333	567	348.333
5	OgaKO	Fly 2	12/24 Default	1119	722.333	396.667
5	OgaKO	Fly 3	12/24 Default	1440	742.667	697.333
5	OgaKO	Fly 4	12/24 Default	934	489.667	444.333
5	OgaKO	Fly 5	12/24 Default	1556.67	615.667	941
5	OgaKO	Fly 6	12/24 Default	1240	652.667	587.333
5	OgaKO	Fly 7	12/24 Default	748	442.333	305.667
5	OgaKO	Fly 8	12/24 Default	702	440.667	261.333
5	OgaKO	Fly 9	12/24 Default	1051	462.333	588.667
5	OgaKO	Fly 10	12/24 Default	529	380.667	148.333
5	OgaKO	Fly 11	12/24 Default	716	452.667	263.333
5	OgaKO	Fly 12	12/24 Default	1255.67	607.667	648
5	OgaKO	Fly 13	12/24 Default	891.333	443	448.333
5	OgaKO	Fly 14	12/24 Default	866	459.667	406.333
5	OgaKO	Fly 15	12/24 Default	1359.67	589.333	770.333
5	OgaKO	Fly 16	12/24 Default	1008.33	537.667	470.667
5	OgaKO	Fly 17	12/24 Default	1351	714.333	636.667
5	OgaKO	Fly 18	12/24 Default	685	437	248
5	OgaKO	Fly 19	12/24 Default	821.667	465.333	356.333
5	OgaKO	Fly 20	12/24 Default	744.667	406	338.667
5	OgaKO	Fly 21	12/24 Default	994.333	468.333	526
5	OgaKO	Fly 22	12/24 Default	710	487	223
5	WT	Fly 1	12/24 Default	1106.33	752	354.333
5	WT	Fly 2	12/24 Default	2025	1190.67	834.333
5	WT	Fly 3	12/24 Default	681.333	544.667	136.667
5	WT	Fly 4	12/24 Default	997.667	671	326.667
5	WT	Fly 5	12/24 Default	1390.67	886.333	504.333
5	WT	Fly 6	12/24 Default	659.333	494	165.333
5	WT	Fly 7	12/24 Default	559.667	417.667	142
5	WT	Fly 8	12/24 Default	1938.67	960.333	978.333
5	WT	Fly 9	12/24 Default	1236	799.667	436.333
5	WT	Fly 10	12/24 Default	1005.67	687	318.667
5	WT	Fly 11	12/24 Default	1713.33	1155.33	558
5	WT	Fly 12	12/24 Default	1258.67	850.333	408.333
5	WT	Fly 13	12/24 Default	1395	970.667	424.333
5	WT	Fly 14	12/24 Default	868	545.667	322.333
5	WT	Fly 15	12/24 Default	1241.67	692	549.667
5	WT	Fly 16	12/24 Default	514.667	328.667	186
5	WT	Fly 17	12/24 Default	1625.67	1013.67	612
5	WT	Fly 18	12/24 Default	1225.67	687	538.667
5	WT	Fly 19	12/24 Default	654.667	497	157.667
5	WT	Fly 20	12/24 Default	996	599.333	396.667
5	WT	Fly 21	12/24 Default	1690	1002.67	687.333
5	C941Y;OgaKO	Fly 1	12/24 Default	776.667	476.333	300.333
5	C941Y;OgaKO	Fly 2	12/24 Default	881.333	558	323.333
5	C941Y;OgaKO	Fly 3	12/24 Default	509	358	151
5	C941Y;OgaKO	Fly 4	12/24 Default	407.333	312.667	94.6667
5	C941Y;OgaKO	Fly 5	12/24 Default	1200.33	812.333	388
5	C941Y;OgaKO	Fly 6	12/24 Default	723.667	486.667	237
5	C941Y;OgaKO	Fly 7	12/24 Default	829	653	176
5	C941Y;OgaKO	Fly 8	12/24 Default	1182	761.333	420.667
5	C941Y;OgaKO	Fly 9	12/24 Default	647.667	392.333	255.333
5	C941Y;OgaKO	Fly 10	12/24 Default	1191.67	833	358.667
5	C941Y;OgaKO	Fly 11	12/24 Default	832.667	560	272.667
5	C941Y;OgaKO	Fly 12	12/24 Default	787.333	501.333	286
5	C941Y;OgaKO	Fly 13	12/24 Default	749	452.667	296.333
5	C941Y;OgaKO	Fly 14	12/24 Default	1779	1071	708
5	C941Y;OgaKO	Fly 15	12/24 Default	1017	739.333	277.667
5	C941Y;OgaKO	Fly 16	12/24 Default	1094.33	781.667	312.667
5	C941Y;OgaKO	Fly 17	12/24 Default	930.667	708	222.667

## Sheet: Bout Number
Rep	Group	Fly Number	Bin Length	24-hour bin	1st 12-hour bin	2nd 12-hour bin
2	WT	Fly 1	12/24 Default	32.3333	20	12.3333
2	WT	Fly 2	12/24 Default	28.6667	16.3333	12.3333
2	WT	Fly 3	12/24 Default	19.6667	12	7.6667
2	WT	Fly 4	12/24 Default	30	18	12
2	WT	Fly 5	12/24 Default	30.3333	11.6667	18.6667
2	WT	Fly 6	12/24 Default	27.3333	15	12.3333
2	WT	Fly 7	12/24 Default	25.3333	10.6667	14.6667
2	WT	Fly 8	12/24 Default	16.6667	8.6667	8
2	WT	Fly 9	12/24 Default	24.3333	13.6667	10.6667
2	WT	Fly 10	12/24 Default	19.3333	13.3333	6
2	WT	Fly 11	12/24 Default	30	13	17
2	WT	Fly 12	12/24 Default	19.6667	9.3333	10.3333
2	WT	Fly 13	12/24 Default	25	10.3333	14.6667
2	WT	Fly 14	12/24 Default	18.6667	9.6667	9
2	WT	Fly 15	12/24 Default	18.3333	11.3333	7
2	WT	Fly 16	12/24 Default	10.6667	8	2.6667
2	WT	Fly 17	12/24 Default	15.6667	8.6667	7
2	WT	Fly 18	12/24 Default	32.6667	15	17.6667
2	WT	Fly 19	12/24 Default	20.6667	14.3333	6.3333
2	WT	Fly 20	12/24 Default	8	5	3
2	WT	Fly 21	12/24 Default	25	15.6667	9.3333
2	WT	Fly 22	12/24 Default	16	9.6667	6.3333
2	OgaKO	Fly 1	12/24 Default	27.3333	13.6667	13.6667
2	OgaKO	Fly 2	12/24 Default	20.6667	12	8.6667
2	OgaKO	Fly 3	12/24 Default	25	11.3333	13.6667
2	OgaKO	Fly 4	12/24 Default	27	14	13
2	OgaKO	Fly 5	12/24 Default	29.6667	16	13.6667
2	OgaKO	Fly 6	12/24 Default	22.6667	10.3333	12.3333
2	OgaKO	Fly 7	12/24 Default	26.6667	11	15.6667
2	OgaKO	Fly 8	12/24 Default	45	26	19
2	OgaKO	Fly 9	12/24 Default	29.3333	9	20.3333
2	OgaKO	Fly 10	12/24 Default	15.3333	6.3333	9
2	OgaKO	Fly 11	12/24 Default	14.6667	6.6667	8
2	OgaKO	Fly 12	12/24 Default	27.3333	13.3333	14
2	OgaKO	Fly 13	12/24 Default	32.3333	13.6667	18.6667
2	OgaKO	Fly 14	12/24 Default	27	16	11
2	OgaKO	Fly 15	12/24 Default	17.3333	11.3333	6
2	OgaKO	Fly 16	12/24 Default	20.3333	5.3333	15
2	OgaKO	Fly 17	12/24 Default	13.6667	3	10.6667
2	OgaKO	Fly 18	12/24 Default	37.6667	13	24.6667
2	OgaKO	Fly 19	12/24 Default	33	15	18
2	OgaKO	Fly 20	12/24 Default	31.6667	11	20.6667
2	OgaKO	Fly 21	12/24 Default	31.6667	12.6667	19
2	OgaKO	Fly 22	12/24 Default	20.6667	8.6667	12
2	OgaKO	Fly 23	12/24 Default	31.3333	14.6667	16.6667
2	OgaKO	Fly 24	12/24 Default	37.3333	14.6667	22.6667
2	OgaKO	Fly 25	12/24 Default	13	5.6667	7.3333
2	C941Y;OgaKO	Fly 1	12/24 Default	40.6667	17	23.6667
2	C941Y;OgaKO	Fly 2	12/24 Default	31.3333	13.6667	17.6667
2	C941Y;OgaKO	Fly 3	12/24 Default	32.6667	13.3333	19.3333
2	C941Y;OgaKO	Fly 4	12/24 Default	26	10	16
2	C941Y;OgaKO	Fly 5	12/24 Default	32.6667	20	12.6667
2	C941Y;OgaKO	Fly 6	12/24 Default	33	16.3333	16.6667
2	C941Y;OgaKO	Fly 7	12/24 Default	29.3333	15.6667	13.6667
2	C941Y;OgaKO	Fly 8	12/24 Default	21.6667	16.6667	5
2	C941Y;OgaKO	Fly 9	12/24 Default	32.3333	12.6667	19.6667
2	C941Y;OgaKO	Fly 10	12/24 Default	34	15.6667	18.3333
2	C941Y;OgaKO	Fly 11	12/24 Default	32	15.3333	16.6667
2	C941Y;OgaKO	Fly 12	12/24 Default	32	13	19
2	C941Y;OgaKO	Fly 13	12/24 Default	21.6667	7.3333	14.3333
2	C941Y;OgaKO	Fly 14	12/24 Default	30.3333	13	17.3333
2	C941Y;OgaKO	Fly 15	12/24 Default	32.3333	14.3333	18
2	C941Y;OgaKO	Fly 16	12/24 Default	26	8	18
2	C941Y;OgaKO	Fly 17	12/24 Default	27.6667	12.6667	15
2	C941Y;OgaKO	Fly 18	12/24 Default	25.6667	15	10.6667
2	C941Y	Fly 1	12/24 Default	21.3333	9.3333	12
2	C941Y	Fly 2	12/24 Default	27.3333	15	12.3333
2	C941Y	Fly 3	12/24 Default	35.6667	16.6667	19
2	C941Y	Fly 4	12/24 Default	27.6667	16	11.6667
2	C941Y	Fly 5	12/24 Default	22	14	8
2	C941Y	Fly 6	12/24 Default	22	13.6667	8.3333
2	C941Y	Fly 7	12/24 Default	29.3333	11.6667	17.6667
2	C941Y	Fly 8	12/24 Default	22	8.6667	13.3333
2	C941Y	Fly 9	12/24 Default	34.3333	13	21.3333
2	C941Y	Fly 10	12/24 Default	30	16	14
2	C941Y	Fly 11	12/24 Default	25.6667	12	13.6667
2	C941Y	Fly 12	12/24 Default	27.3333	9.6667	17.6667
2	C941Y	Fly 13	12/24 Default	37.6667	14.6667	23
2	C941Y	Fly 14	12/24 Default	28	13	15
2	C941Y	Fly 15	12/24 Default	30.6667	11	19.6667
2	C941Y	Fly 16	12/24 Default	30.3333	15.3333	15
2	C941Y	Fly 17	12/24 Default	33.3333	13.6667	19.6667
2	C941Y	Fly 18	12/24 Default	19	7.3333	11.6667
2	C941Y	Fly 19	12/24 Default	25.3333	14	11.3333
2	C941Y	Fly 20	12/24 Default	18	8.3333	9.6667
2	C941Y	Fly 21	12/24 Default	25.3333	13.3333	12
2	C941Y	Fly 22	12/24 Default	25	11.3333	13.6667
2	C941Y	Fly 23	12/24 Default	22	11	11
2	C941Y	Fly 24	12/24 Default	23	12	11
2	C941Y	Fly 25	12/24 Default	23.3333	10.3333	13
3	OgaKO	Fly 1	12/24 Default	26.6667	12	14.6667
3	OgaKO	Fly 2	12/24 Default	23.3333	15	8.3333
3	OgaKO	Fly 3	12/24 Default	18	9.3333	8.6667
3	OgaKO	Fly 4	12/24 Default	24	8.6667	15.3333
3	OgaKO	Fly 5	12/24 Default	15.3333	10.3333	5
3	OgaKO	Fly 6	12/24 Default	17	7.3333	9.6667
3	OgaKO	Fly 7	12/24 Default	18.3333	9.3333	9
3	OgaKO	Fly 8	12/24 Default	25	13.3333	11.6667
3	OgaKO	Fly 9	12/24 Default	18.6667	8.6667	10
3	OgaKO	Fly 10	12/24 Default	21.6667	10	11.6667
3	OgaKO	Fly 11	12/24 Default	25.6667	14.6667	11
3	OgaKO	Fly 12	12/24 Default	11.6667	6	5.6667
3	OgaKO	Fly 13	12/24 Default	28.6667	13	15.6667
3	OgaKO	Fly 14	12/24 Default	8.6667	3.3333	5.3333
3	OgaKO	Fly 15	12/24 Default	9	4.6667	4.3333
3	OgaKO	Fly 16	12/24 Default	26	11.6667	14.3333
3	OgaKO	Fly 17	12/24 Default	21.6667	9.6667	12
3	OgaKO	Fly 18	12/24 Default	16.6667	5.6667	11
3	OgaKO	Fly 19	12/24 Default	9	5.6667	3.3333
3	OgaKO	Fly 20	12/24 Default	19.6667	12	7.6667
3	OgaKO	Fly 21	12/24 Default	25	10.3333	14.6667
3	OgaKO	Fly 22	12/24 Default	36.3333	20.3333	16
3	OgaKO	Fly 23	12/24 Default	28	13.3333	14.6667
3	C941Y	Fly 1	12/24 Default	20.6667	7.3333	13.3333
3	C941Y	Fly 2	12/24 Default	29.6667	12.3333	17.3333
3	C941Y	Fly 3	12/24 Default	22.6667	9.6667	13
3	C941Y	Fly 4	12/24 Default	17.6667	10.3333	7.3333
3	C941Y	Fly 5	12/24 Default	37.3333	16.6667	20.6667
3	C941Y	Fly 6	12/24 Default	23.3333	14.3333	9
3	C941Y	Fly 7	12/24 Default	23.3333	12.3333	11
3	C941Y	Fly 8	12/24 Default	20.6667	11	9.6667
3	C941Y	Fly 9	12/24 Default	22	11.6667	10.3333
3	C941Y	Fly 10	12/24 Default	36.6667	18.6667	18
3	C941Y	Fly 11	12/24 Default	29.3333	13.6667	15.6667
3	C941Y	Fly 12	12/24 Default	46	22.6667	23.3333
3	C941Y	Fly 13	12/24 Default	23.3333	11.6667	11.6667
3	C941Y	Fly 14	12/24 Default	24.6667	12	12.6667
3	C941Y	Fly 15	12/24 Default	24.3333	12.6667	11.6667
3	C941Y	Fly 16	12/24 Default	21.3333	14.6667	6.6667
3	C941Y	Fly 17	12/24 Default	22.6667	11	11.6667
3	C941Y	Fly 18	12/24 Default	26	13.3333	12.6667
3	C941Y	Fly 19	12/24 Default	35	17.3333	17.6667
3	C941Y	Fly 20	12/24 Default	25.3333	12.3333	13
3	C941Y	Fly 21	12/24 Default	19.6667	10.6667	9
3	C941Y	Fly 22	12/24 Default	22.6667	11	11.6667
3	C941Y	Fly 23	12/24 Default	31.3333	14	17.3333
3	WT	Fly 1	12/24 Default	21	10.6667	10.3333
3	WT	Fly 2	12/24 Default	18.6667	9.3333	9.3333
3	WT	Fly 3	12/24 Default	15.6667	8.6667	7
3	WT	Fly 4	12/24 Default	17	11	6
3	WT	Fly 5	12/24 Default	15.6667	8	7.6667
3	WT	Fly 6	12/24 Default	24.3333	10	14.3333
3	WT	Fly 7	12/24 Default	18	6.3333	11.6667
3	WT	Fly 8	12/24 Default	28.3333	14.3333	14
3	WT	Fly 9	12/24 Default	16.3333	10.3333	6
3	WT	Fly 10	12/24 Default	17.6667	7.3333	10.3333
3	WT	Fly 11	12/24 Default	18.6667	9	9.6667
3	WT	Fly 12	12/24 Default	18	7.6667	10.3333
3	WT	Fly 13	12/24 Default	17.3333	7	10.3333
3	WT	Fly 14	12/24 Default	17	11.6667	5.3333
3	WT	Fly 15	12/24 Default	43.3333	22.3333	21
3	WT	Fly 16	12/24 Default	23.6667	13.6667	10
3	WT	Fly 17	12/24 Default	28.6667	16.3333	12.3333
3	WT	Fly 18	12/24 Default	13.6667	2.6667	11
3	WT	Fly 19	12/24 Default	27	15.3333	11.6667
3	WT	Fly 20	12/24 Default	15	5.3333	9.6667
3	C941Y;OgaKO	Fly 1	12/24 Default	20	10.3333	9.6667
3	C941Y;OgaKO	Fly 2	12/24 Default	18	12	6
3	C941Y;OgaKO	Fly 3	12/24 Default	26.6667	13	13.6667
3	C941Y;OgaKO	Fly 4	12/24 Default	29	19	10
3	C941Y;OgaKO	Fly 5	12/24 Default	24	11.3333	12.6667
3	C941Y;OgaKO	Fly 6	12/24 Default	15.6667	7.6667	8
3	C941Y;OgaKO	Fly 7	12/24 Default	28	13	15
3	C941Y;OgaKO	Fly 8	12/24 Default	27.6667	15.3333	12.3333
3	C941Y;OgaKO	Fly 9	12/24 Default	16.3333	5.6667	10.6667
3	C941Y;OgaKO	Fly 10	12/24 Default	55.6667	37.3333	18.3333
3	C941Y;OgaKO	Fly 11	12/24 Default	20	6.6667	13.3333
3	C941Y;OgaKO	Fly 12	12/24 Default	33.6667	12.6667	21
3	C941Y;OgaKO	Fly 13	12/24 Default	21	11.6667	9.3333
3	C941Y;OgaKO	Fly 14	12/24 Default	26.6667	14	12.6667
3	C941Y;OgaKO	Fly 15	12/24 Default	23.6667	10.6667	13
3	C941Y;OgaKO	Fly 16	12/24 Default	23.3333	10.6667	12.6667
3	C941Y;OgaKO	Fly 17	12/24 Default	32.3333	15	17.3333
3	C941Y;OgaKO	Fly 18	12/24 Default	28.6667	16.6667	12
3	C941Y;OgaKO	Fly 19	12/24 Default	15.3333	9	6.3333
3	C941Y;OgaKO	Fly 20	12/24 Default	19.6667	10.6667	9
3	C941Y;OgaKO	Fly 21	12/24 Default	23.6667	15	8.6667
3	C941Y;OgaKO	Fly 22	12/24 Default	24	13.6667	10.3333
4	C941Y	Fly 1	12/24 Default	26	10.6667	15.3333
4	C941Y	Fly 2	12/24 Default	21	12.6667	8.3333
4	C941Y	Fly 3	12/24 Default	46.3333	21.6667	24.6667
4	C941Y	Fly 4	12/24 Default	21.3333	12.6667	8.6667
4	C941Y	Fly 5	12/24 Default	35.3333	13.6667	21.6667
4	C941Y	Fly 6	12/24 Default	31.6667	14	17.6667
4	C941Y	Fly 7	12/24 Default	25.6667	14	11.6667
4	C941Y	Fly 8	12/24 Default	25.3333	9.3333	16
4	C941Y	Fly 9	12/24 Default	40	20.3333	19.6667
4	C941Y	Fly 10	12/24 Default	30.6667	18.3333	12.3333
4	C941Y	Fly 11	12/24 Default	33	14.6667	18.3333
4	C941Y	Fly 12	12/24 Default	36	16	20
4	C941Y	Fly 13	12/24 Default	44	18.6667	25.3333
4	C941Y	Fly 14	12/24 Default	33.3333	18	15.3333
4	C941Y	Fly 15	12/24 Default	25	13	12
4	C941Y	Fly 16	12/24 Default	30.3333	19.3333	11
4	C941Y	Fly 17	12/24 Default	33.3333	12	21.3333
4	C941Y	Fly 18	12/24 Default	18.6667	11	7.6667
4	C941Y	Fly 19	12/24 Default	28.6667	14	14.6667
4	C941Y	Fly 20	12/24 Default	30.6667	13.3333	17.3333
4	C941Y	Fly 21	12/24 Default	27.6667	8.3333	19.3333
4	C941Y	Fly 22	12/24 Default	21	10.6667	10.3333
4	C941Y	Fly 23	12/24 Default	34	13.3333	20.6667
4	C941Y	Fly 24	12/24 Default	32.6667	20.6667	12
4	C941Y	Fly 25	12/24 Default	31.6667	20	11.6667
4	OgaKO	Fly 1	12/24 Default	20.6667	8.6667	12
4	OgaKO	Fly 2	12/24 Default	16.6667	8.6667	8
4	OgaKO	Fly 3	12/24 Default	24.3333	15	9.3333
4	OgaKO	Fly 4	12/24 Default	25.3333	14.3333	11
4	OgaKO	Fly 5	12/24 Default	31	14.3333	16.6667
4	OgaKO	Fly 6	12/24 Default	40.3333	13.3333	27
4	OgaKO	Fly 7	12/24 Default	23.6667	10.3333	13.3333
4	OgaKO	Fly 8	12/24 Default	15.3333	5.6667	9.6667
4	OgaKO	Fly 9	12/24 Default	20.6667	11.3333	9.3333
4	OgaKO	Fly 10	12/24 Default	17	9	8
4	OgaKO	Fly 11	12/24 Default	17	8	9
4	OgaKO	Fly 12	12/24 Default	23.3333	12	11.3333
4	OgaKO	Fly 13	12/24 Default	19.6667	10.6667	9
4	OgaKO	Fly 14	12/24 Default	25	12	13
4	OgaKO	Fly 15	12/24 Default	22	12.3333	9.6667
4	OgaKO	Fly 16	12/24 Default	23	8.6667	14.3333
4	OgaKO	Fly 17	12/24 Default	17.6667	6	11.6667
4	OgaKO	Fly 18	12/24 Default	17.3333	8.6667	8.6667
4	OgaKO	Fly 19	12/24 Default	19.3333	10	9.3333
4	OgaKO	Fly 20	12/24 Default	30.3333	12.3333	18
4	OgaKO	Fly 21	12/24 Default	13.6667	8	5.6667
4	OgaKO	Fly 22	12/24 Default	25.6667	14.6667	11
4	OgaKO	Fly 23	12/24 Default	21.3333	9.6667	11.6667
4	OgaKO	Fly 24	12/24 Default	17.6667	9.6667	8
4	OgaKO	Fly 25	12/24 Default	21.3333	8.6667	12.6667
4	WT	Fly 1	12/24 Default	12.6667	8	4.6667
4	WT	Fly 2	12/24 Default	15.6667	11	4.6667
4	WT	Fly 3	12/24 Default	14	10	4
4	WT	Fly 4	12/24 Default	10.3333	9	1.3333
4	WT	Fly 5	12/24 Default	14.6667	9.3333	5.3333
4	WT	Fly 6	12/24 Default	33.3333	15	18.3333
4	WT	Fly 7	12/24 Default	13.3333	9.6667	3.6667
4	WT	Fly 8	12/24 Default	23.3333	11.6667	11.6667
4	WT	Fly 9	12/24 Default	31.3333	13.6667	17.6667
4	WT	Fly 10	12/24 Default	18.6667	11.3333	7.3333
4	WT	Fly 11	12/24 Default	15	8.3333	6.6667
4	WT	Fly 12	12/24 Default	16	11	5
4	WT	Fly 13	12/24 Default	12.3333	9	3.3333
4	WT	Fly 14	12/24 Default	27.6667	15.6667	12
4	WT	Fly 15	12/24 Default	18.3333	11	7.3333
4	WT	Fly 16	12/24 Default	21.3333	15.3333	6
4	WT	Fly 17	12/24 Default	16	10	6
4	WT	Fly 18	12/24 Default	22.6667	13.3333	9.3333
4	WT	Fly 19	12/24 Default	14.3333	9.6667	4.6667
4	WT	Fly 20	12/24 Default	16	7	9
4	WT	Fly 21	12/24 Default	18	9	9
4	WT	Fly 22	12/24 Default	18.6667	14	4.6667
4	WT	Fly 23	12/24 Default	18.3333	10.6667	7.6667
4	WT	Fly 24	12/24 Default	17.6667	7.3333	10.3333
4	WT	Fly 25	12/24 Default	16.3333	9.6667	6.6667
4	WT	Fly 26	12/24 Default	16	9	7
4	C941Y;OgaKO	Fly 1	12/24 Default	18.3333	10.6667	7.6667
4	C941Y;OgaKO	Fly 2	12/24 Default	40	15.6667	24.3333
4	C941Y;OgaKO	Fly 3	12/24 Default	19.6667	11.3333	8.3333
4	C941Y;OgaKO	Fly 4	12/24 Default	22	12.6667	9.3333
4	C941Y;OgaKO	Fly 5	12/24 Default	16.3333	10.6667	5.6667
4	C941Y;OgaKO	Fly 6	12/24 Default	32	18.6667	13.3333
4	C941Y;OgaKO	Fly 7	12/24 Default	22	17	5
4	C941Y;OgaKO	Fly 8	12/24 Default	24.3333	14.6667	9.6667
4	C941Y;OgaKO	Fly 9	12/24 Default	26.3333	15.6667	10.6667
4	C941Y;OgaKO	Fly 10	12/24 Default	18.6667	15.3333	3.3333
4	C941Y;OgaKO	Fly 11	12/24 Default	17.3333	14	3.3333
4	C941Y;OgaKO	Fly 12	12/24 Default	31	13.3333	17.6667
4	C941Y;OgaKO	Fly 13	12/24 Default	44.3333	20.3333	24
4	C941Y;OgaKO	Fly 14	12/24 Default	23.3333	13	10.3333
4	C941Y;OgaKO	Fly 15	12/24 Default	49.3333	27.3333	22
4	C941Y;OgaKO	Fly 16	12/24 Default	15.3333	10.3333	5
4	C941Y;OgaKO	Fly 17	12/24 Default	39.3333	23.6667	15.6667
5	C941Y	Fly 1	12/24 Default	26.3333	17	9.3333
5	C941Y	Fly 2	12/24 Default	28.3333	14	14.3333
5	C941Y	Fly 3	12/24 Default	17	8.6667	8.3333
5	C941Y	Fly 4	12/24 Default	28.3333	12.6667	15.6667
5	C941Y	Fly 5	12/24 Default	14	9.6667	4.3333
5	C941Y	Fly 6	12/24 Default	21	14	7
5	C941Y	Fly 7	12/24 Default	23	11.6667	11.3333
5	C941Y	Fly 8	12/24 Default	14.3333	8.3333	6
5	C941Y	Fly 9	12/24 Default	25	13.3333	11.6667
5	C941Y	Fly 10	12/24 Default	20.6667	13	7.6667
5	C941Y	Fly 11	12/24 Default	18.6667	12	6.6667
5	C941Y	Fly 12	12/24 Default	20.6667	10.3333	10.3333
5	C941Y	Fly 13	12/24 Default	18	10.3333	7.6667
5	C941Y	Fly 14	12/24 Default	15.6667	8	7.6667
5	C941Y	Fly 15	12/24 Default	11.3333	5.6667	5.6667
5	C941Y	Fly 16	12/24 Default	29.6667	9.3333	20.3333
5	C941Y	Fly 17	12/24 Default	22.3333	8.6667	13.6667
5	C941Y	Fly 18	12/24 Default	34.6667	10.3333	24.3333
5	C941Y	Fly 19	12/24 Default	25.6667	12.6667	13
5	C941Y	Fly 20	12/24 Default	26.3333	17.6667	8.6667
5	C941Y	Fly 21	12/24 Default	17	9.6667	7.3333
5	OgaKO	Fly 1	12/24 Default	24	9	15
5	OgaKO	Fly 2	12/24 Default	20.6667	10.3333	10.3333
5	OgaKO	Fly 3	12/24 Default	15.3333	7.3333	8
5	OgaKO	Fly 4	12/24 Default	24	10.3333	13.6667
5	OgaKO	Fly 5	12/24 Default	10.3333	2.6667	7.6667
5	OgaKO	Fly 6	12/24 Default	7.3333	4	3.3333
5	OgaKO	Fly 7	12/24 Default	22.6667	9.6667	13
5	OgaKO	Fly 8	12/24 Default	13	6	7
5	OgaKO	Fly 9	12/24 Default	13.3333	6.6667	6.6667
5	OgaKO	Fly 10	12/24 Default	14.3333	6	8.3333
5	OgaKO	Fly 11	12/24 Default	17	4.3333	12.6667
5	OgaKO	Fly 12	12/24 Default	6.3333	1.6667	4.6667
5	OgaKO	Fly 13	12/24 Default	5.3333	2.6667	2.6667
5	OgaKO	Fly 14	12/24 Default	12.6667	7.3333	5.3333
5	OgaKO	Fly 15	12/24 Default	16	4	12
5	OgaKO	Fly 16	12/24 Default	10.6667	6.6667	4
5	OgaKO	Fly 17	12/24 Default	7.6667	3	4.6667
5	OgaKO	Fly 18	12/24 Default	14.3333	4.6667	9.6667
5	OgaKO	Fly 19	12/24 Default	7.6667	3.3333	4.3333
5	OgaKO	Fly 20	12/24 Default	29.6667	12.3333	17.3333
5	OgaKO	Fly 21	12/24 Default	13.3333	3.3333	10
5	OgaKO	Fly 22	12/24 Default	16.3333	9.3333	7
5	WT	Fly 1	12/24 Default	16.6667	10.6667	6
5	WT	Fly 2	12/24 Default	26.6667	12.3333	14.3333
5	WT	Fly 3	12/24 Default	12.6667	6	6.6667
5	WT	Fly 4	12/24 Default	16	11	5
5	WT	Fly 5	12/24 Default	12	6	6
5	WT	Fly 6	12/24 Default	14	12.3333	1.6667
5	WT	Fly 7	12/24 Default	9.3333	6.3333	3
5	WT	Fly 8	12/24 Default	9.3333	4.6667	4.6667
5	WT	Fly 9	12/24 Default	14.3333	8.3333	6
5	WT	Fly 10	12/24 Default	23	9.6667	13.3333
5	WT	Fly 11	12/24 Default	14.3333	8.3333	6
5	WT	Fly 12	12/24 Default	22.3333	9	13.3333
5	WT	Fly 13	12/24 Default	17	10	7
5	WT	Fly 14	12/24 Default	15.3333	8	7.3333
5	WT	Fly 15	12/24 Default	18.3333	10.6667	7.6667
5	WT	Fly 16	12/24 Default	13.6667	2.3333	11.3333
5	WT	Fly 17	12/24 Default	8.6667	6.3333	2.3333
5	WT	Fly 18	12/24 Default	18.6667	12	6.6667
5	WT	Fly 19	12/24 Default	14.3333	9	5.3333
5	WT	Fly 20	12/24 Default	38.3333	17	21.3333
5	WT	Fly 21	12/24 Default	14.6667	6	8.6667
5	C941Y;OgaKO	Fly 1	12/24 Default	14	8	6
5	C941Y;OgaKO	Fly 2	12/24 Default	29.6667	15.6667	14
5	C941Y;OgaKO	Fly 3	12/24 Default	21.6667	13.6667	8
5	C941Y;OgaKO	Fly 4	12/24 Default	19.3333	8.6667	10.6667
5	C941Y;OgaKO	Fly 5	12/24 Default	19.3333	11.3333	8
5	C941Y;OgaKO	Fly 6	12/24 Default	15	9.6667	5.3333
5	C941Y;OgaKO	Fly 7	12/24 Default	27.6667	17	10.6667
5	C941Y;OgaKO	Fly 8	12/24 Default	14	8.3333	5.6667
5	C941Y;OgaKO	Fly 9	12/24 Default	28.6667	11.6667	17
5	C941Y;OgaKO	Fly 10	12/24 Default	14.6667	6	8.6667
5	C941Y;OgaKO	Fly 11	12/24 Default	26	18.6667	7.3333
5	C941Y;OgaKO	Fly 12	12/24 Default	31.6667	16.3333	15.3333
5	C941Y;OgaKO	Fly 13	12/24 Default	32.3333	18.3333	14
5	C941Y;OgaKO	Fly 14	12/24 Default	29.3333	11.3333	18
5	C941Y;OgaKO	Fly 15	12/24 Default	19	11.3333	7.6667
5	C941Y;OgaKO	Fly 16	12/24 Default	19.3333	11	8.3333
5	C941Y;OgaKO	Fly 17	12/24 Default	21.6667	12.3333	9.3333

## Sheet: Total Sleep
Rep	Group	Fly Number	Bin Length	24-hour bin	1st 12-hour bin	2nd 12-hour bin
3	OgaKO	Fly 1	12/24 Default	867.333	367.667	499.667
3	OgaKO	Fly 2	12/24 Default	783	313	470
3	OgaKO	Fly 3	12/24 Default	1090.33	546	544.333
3	OgaKO	Fly 4	12/24 Default	1051.33	485.333	566
3	OgaKO	Fly 5	12/24 Default	1120.33	508.667	611.667
3	OgaKO	Fly 6	12/24 Default	636.667	284.667	352
3	OgaKO	Fly 7	12/24 Default	1182.67	592.333	590.333
3	OgaKO	Fly 8	12/24 Default	776.667	354.667	422
3	OgaKO	Fly 9	12/24 Default	1081.33	518.667	562.667
3	OgaKO	Fly 10	12/24 Default	940	444.333	495.667
3	OgaKO	Fly 11	12/24 Default	984.667	530.667	454
3	OgaKO	Fly 12	12/24 Default	982.667	417.667	565
3	OgaKO	Fly 13	12/24 Default	1015.33	478	537.333
3	OgaKO	Fly 14	12/24 Default	1036.33	485.333	551
3	OgaKO	Fly 15	12/24 Default	1097.67	457.667	640
3	OgaKO	Fly 16	12/24 Default	1002.33	463.667	538.667
3	OgaKO	Fly 17	12/24 Default	1062.67	478	584.667
3	OgaKO	Fly 18	12/24 Default	1010.67	462	548.667
3	OgaKO	Fly 19	12/24 Default	878	425.667	452.333
3	OgaKO	Fly 20	12/24 Default	1117.33	581	536.333
3	OgaKO	Fly 21	12/24 Default	756	297.333	458.667
3	OgaKO	Fly 22	12/24 Default	1167	547.667	619.333
3	OgaKO	Fly 23	12/24 Default	1042	492.667	549.333
3	C941Y	Fly 1	12/24 Default	569.333	258.667	310.667
3	C941Y	Fly 2	12/24 Default	546	152.667	393.333
3	C941Y	Fly 3	12/24 Default	643.333	336.333	307
3	C941Y	Fly 4	12/24 Default	1021.33	424.333	597
3	C941Y	Fly 5	12/24 Default	599	190.333	408.667
3	C941Y	Fly 6	12/24 Default	856.667	293.333	563.333
3	C941Y	Fly 7	12/24 Default	797.667	262.667	535
3	C941Y	Fly 8	12/24 Default	836.667	359	477.667
3	C941Y	Fly 9	12/24 Default	711.333	302	409.333
3	C941Y	Fly 10	12/24 Default	1008.67	462	546.667
3	C941Y	Fly 11	12/24 Default	559.667	275	284.667
3	C941Y	Fly 12	12/24 Default	565.333	220	345.333
3	C941Y	Fly 13	12/24 Default	916	403	513
3	C941Y	Fly 14	12/24 Default	855	377	478
3	C941Y	Fly 15	12/24 Default	726.333	285.333	441
3	C941Y	Fly 16	12/24 Default	523.667	295.333	228.333
3	C941Y	Fly 17	12/24 Default	807.333	371.333	436
3	C941Y	Fly 18	12/24 Default	807	343	464
3	C941Y	Fly 19	12/24 Default	555.667	198.333	357.333
3	C941Y	Fly 20	12/24 Default	632	221.667	410.333
3	C941Y	Fly 21	12/24 Default	878.667	408.667	470
3	C941Y	Fly 22	12/24 Default	855.667	355.667	500
3	C941Y	Fly 23	12/24 Default	570	155.333	414.667
3	WT	Fly 1	12/24 Default	1215.33	604.667	610.667
3	WT	Fly 2	12/24 Default	801.333	256.333	545
3	WT	Fly 3	12/24 Default	947	425.667	521.333
3	WT	Fly 4	12/24 Default	649	310.333	338.667
3	WT	Fly 5	12/24 Default	1047	480.333	566.667
3	WT	Fly 6	12/24 Default	1048.33	456.667	591.667
3	WT	Fly 7	12/24 Default	963	477	486
3	WT	Fly 8	12/24 Default	978.667	441.667	537
3	WT	Fly 9	12/24 Default	1049.33	423.333	626
3	WT	Fly 10	12/24 Default	1110.67	497.667	613
3	WT	Fly 11	12/24 Default	943	436.333	506.667
3	WT	Fly 12	12/24 Default	767	348	419
3	WT	Fly 13	12/24 Default	571.333	195	376.333
3	WT	Fly 14	12/24 Default	1055.67	469	586.667
3	WT	Fly 15	12/24 Default	968.333	548.333	420
3	WT	Fly 16	12/24 Default	774	289	485
3	WT	Fly 17	12/24 Default	1156.33	569	587.333
3	WT	Fly 18	12/24 Default	1146.33	614.333	532
3	WT	Fly 19	12/24 Default	1099	547.667	551.333
3	WT	Fly 20	12/24 Default	1158	648	510
3	C941Y;OgaKO	Fly 1	12/24 Default	1073.67	503	570.667
3	C941Y;OgaKO	Fly 2	12/24 Default	1035	437.333	597.667
3	C941Y;OgaKO	Fly 3	12/24 Default	701	279	422
3	C941Y;OgaKO	Fly 4	12/24 Default	975.667	399	576.667
3	C941Y;OgaKO	Fly 5	12/24 Default	1157	549.333	607.667
3	C941Y;OgaKO	Fly 6	12/24 Default	933.333	391.333	542
3	C941Y;OgaKO	Fly 7	12/24 Default	1017.67	404.333	613.333
3	C941Y;OgaKO	Fly 8	12/24 Default	917.667	368.333	549.333
3	C941Y;OgaKO	Fly 9	12/24 Default	877.333	343.333	534
3	C941Y;OgaKO	Fly 10	12/24 Default	1110.33	454	656.333
3	C941Y;OgaKO	Fly 11	12/24 Default	869	348.333	520.667
3	C941Y;OgaKO	Fly 12	12/24 Default	977.333	409.333	568
3	C941Y;OgaKO	Fly 13	12/24 Default	1042.33	499.333	543
3	C941Y;OgaKO	Fly 14	12/24 Default	863.333	363.667	499.667
3	C941Y;OgaKO	Fly 15	12/24 Default	882	334	548
3	C941Y;OgaKO	Fly 16	12/24 Default	1081.33	466	615.333
3	C941Y;OgaKO	Fly 17	12/24 Default	1188.67	545.667	643
3	C941Y;OgaKO	Fly 18	12/24 Default	1097.67	497.667	600
3	C941Y;OgaKO	Fly 19	12/24 Default	1054.33	459.333	595
3	C941Y;OgaKO	Fly 20	12/24 Default	921	406.667	514.333
3	C941Y;OgaKO	Fly 21	12/24 Default	1054	423	631
3	C941Y;OgaKO	Fly 22	12/24 Default	989.667	436	553.667
2	WT	Fly 1	12/24 Default	890	309.667	580.333
2	WT	Fly 2	12/24 Default	803.333	441.667	361.667
2	WT	Fly 3	12/24 Default	1120.67	491.667	629
2	WT	Fly 4	12/24 Default	973	382.667	590.333
2	WT	Fly 5	12/24 Default	1102.67	508.667	594
2	WT	Fly 6	12/24 Default	987.333	384	603.333
2	WT	Fly 7	12/24 Default	950.667	401.333	549.333
2	WT	Fly 8	12/24 Default	889.667	362.333	527.333
2	WT	Fly 9	12/24 Default	905	365.667	539.333
2	WT	Fly 10	12/24 Default	967.333	407.667	559.667
2	WT	Fly 11	12/24 Default	851	353	498
2	WT	Fly 12	12/24 Default	862.667	278	584.667
2	WT	Fly 13	12/24 Default	892.333	346.333	546
2	WT	Fly 14	12/24 Default	995	446.667	548.333
2	WT	Fly 15	12/24 Default	938	409	529
2	WT	Fly 16	12/24 Default	1048.67	427.667	621
2	WT	Fly 17	12/24 Default	906.667	409.667	497
2	WT	Fly 18	12/24 Default	734	336	398
2	WT	Fly 19	12/24 Default	1034.67	467	567.667
2	WT	Fly 20	12/24 Default	898.333	359.667	538.667
2	WT	Fly 21	12/24 Default	619.333	314.667	304.667
2	WT	Fly 22	12/24 Default	1069.67	492.333	577.333
2	OgaKO	Fly 1	12/24 Default	1077.33	532.333	545
2	OgaKO	Fly 2	12/24 Default	781	444	337
2	OgaKO	Fly 3	12/24 Default	1013	544	469
2	OgaKO	Fly 4	12/24 Default	689.667	302.333	387.333
2	OgaKO	Fly 5	12/24 Default	1120.67	578	542.667
2	OgaKO	Fly 6	12/24 Default	1031.33	467.667	563.667
2	OgaKO	Fly 7	12/24 Default	880	455	425
2	OgaKO	Fly 8	12/24 Default	1108.67	538.333	570.333
2	OgaKO	Fly 9	12/24 Default	465.333	141.667	323.667
2	OgaKO	Fly 10	12/24 Default	993.667	467	526.667
2	OgaKO	Fly 11	12/24 Default	977.667	472.333	505.333
2	OgaKO	Fly 12	12/24 Default	1005.67	453.667	552
2	OgaKO	Fly 13	12/24 Default	840.333	429.667	410.667
2	OgaKO	Fly 14	12/24 Default	1188	543.333	644.667
2	OgaKO	Fly 15	12/24 Default	790.667	315.333	475.333
2	OgaKO	Fly 16	12/24 Default	658.667	223	435.667
2	OgaKO	Fly 17	12/24 Default	625	251.667	373.333
2	OgaKO	Fly 18	12/24 Default	1051	520	531
2	OgaKO	Fly 19	12/24 Default	867	338	529
2	OgaKO	Fly 20	12/24 Default	826.667	373	453.667
2	OgaKO	Fly 21	12/24 Default	916.667	498	418.667
2	OgaKO	Fly 22	12/24 Default	643.667	312	331.667
2	OgaKO	Fly 23	12/24 Default	630.667	301.667	329
2	OgaKO	Fly 24	12/24 Default	615.667	319.667	296
2	OgaKO	Fly 25	12/24 Default	1063.33	548	515.333
2	C941Y;OgaKO	Fly 1	12/24 Default	1036.33	434.667	601.667
2	C941Y;OgaKO	Fly 2	12/24 Default	956.333	455	501.333
2	C941Y;OgaKO	Fly 3	12/24 Default	799	417.667	381.333
2	C941Y;OgaKO	Fly 4	12/24 Default	827.333	418	409.333
2	C941Y;OgaKO	Fly 5	12/24 Default	1047	485.333	561.667
2	C941Y;OgaKO	Fly 6	12/24 Default	948.333	322.667	625.667
2	C941Y;OgaKO	Fly 7	12/24 Default	855	348	507
2	C941Y;OgaKO	Fly 8	12/24 Default	1140.67	507.667	633
2	C941Y;OgaKO	Fly 9	12/24 Default	703	314	389
2	C941Y;OgaKO	Fly 10	12/24 Default	952	399.333	552.667
2	C941Y;OgaKO	Fly 11	12/24 Default	939.667	358	581.667
2	C941Y;OgaKO	Fly 12	12/24 Default	1221.67	630.333	591.333
2	C941Y;OgaKO	Fly 13	12/24 Default	1103	498.667	604.333
2	C941Y;OgaKO	Fly 14	12/24 Default	721	321.333	399.667
2	C941Y;OgaKO	Fly 15	12/24 Default	1089	472.333	616.667
2	C941Y;OgaKO	Fly 16	12/24 Default	793.333	348	445.333
2	C941Y;OgaKO	Fly 17	12/24 Default	863	406.333	456.667
2	C941Y;OgaKO	Fly 18	12/24 Default	951.667	398.333	553.333
2	C941Y	Fly 1	12/24 Default	969	505	464
2	C941Y	Fly 2	12/24 Default	666	344	322
2	C941Y	Fly 3	12/24 Default	975	506	469
2	C941Y	Fly 4	12/24 Default	523.333	262.333	261
2	C941Y	Fly 5	12/24 Default	694	379	315
2	C941Y	Fly 6	12/24 Default	944.333	412	532.333
2	C941Y	Fly 7	12/24 Default	590.667	273	317.667
2	C941Y	Fly 8	12/24 Default	352.667	139.667	213
2	C941Y	Fly 9	12/24 Default	786	325.333	460.667
2	C941Y	Fly 10	12/24 Default	903.333	398.667	504.667
2	C941Y	Fly 11	12/24 Default	466.667	209.333	257.333
2	C941Y	Fly 12	12/24 Default	592	245	347
2	C941Y	Fly 13	12/24 Default	602.667	176	426.667
2	C941Y	Fly 14	12/24 Default	949.667	392.667	557
2	C941Y	Fly 15	12/24 Default	721	346.333	374.667
2	C941Y	Fly 16	12/24 Default	778.667	310.333	468.333
2	C941Y	Fly 17	12/24 Default	824	339.667	484.333
2	C941Y	Fly 18	12/24 Default	578.667	259.333	319.333
2	C941Y	Fly 19	12/24 Default	1012.67	440	572.667
2	C941Y	Fly 20	12/24 Default	648.333	229.333	419
2	C941Y	Fly 21	12/24 Default	760.333	255	505.333
2	C941Y	Fly 22	12/24 Default	795.333	320	475.333
2	C941Y	Fly 23	12/24 Default	631	252	379
2	C941Y	Fly 24	12/24 Default	888.333	408.333	480
2	C941Y	Fly 25	12/24 Default	344	107	237
4	C941Y	Fly 1	12/24 Default	1012.33	454	558.333
4	C941Y	Fly 2	12/24 Default	1072.33	441.667	630.667
4	C941Y	Fly 3	12/24 Default	1079	532.333	546.667
4	C941Y	Fly 4	12/24 Default	1005.67	490.333	515.333
4	C941Y	Fly 5	12/24 Default	772	303.667	468.333
4	C941Y	Fly 6	12/24 Default	1021.67	478	543.667
4	C941Y	Fly 7	12/24 Default	752	293.333	458.667
4	C941Y	Fly 8	12/24 Default	817.333	339.333	478
4	C941Y	Fly 9	12/24 Default	1134.67	530.333	604.333
4	C941Y	Fly 10	12/24 Default	791.667	293.333	498.333
4	C941Y	Fly 11	12/24 Default	669	230	439
4	C941Y	Fly 12	12/24 Default	1235.67	599.667	636
4	C941Y	Fly 13	12/24 Default	996.333	454.333	542
4	C941Y	Fly 14	12/24 Default	867.333	333	534.333
4	C941Y	Fly 15	12/24 Default	1143.33	521.333	622
4	C941Y	Fly 16	12/24 Default	950	368.667	581.333
4	C941Y	Fly 17	12/24 Default	783.667	324.333	459.333
4	C941Y	Fly 18	12/24 Default	962.667	419.333	543.333
4	C941Y	Fly 19	12/24 Default	963.333	381.667	581.667
4	C941Y	Fly 20	12/24 Default	1055.67	481	574.667
4	C941Y	Fly 21	12/24 Default	883.333	398.333	485
4	C941Y	Fly 22	12/24 Default	792.333	264	528.333
4	C941Y	Fly 23	12/24 Default	821	343.667	477.333
4	C941Y	Fly 24	12/24 Default	1228.67	600	628.667
4	C941Y	Fly 25	12/24 Default	973	375.333	597.667
4	OgaKO	Fly 1	12/24 Default	902.333	366	536.333
4	OgaKO	Fly 2	12/24 Default	1031.67	563.667	468
4	OgaKO	Fly 3	12/24 Default	935.667	389.667	546
4	OgaKO	Fly 4	12/24 Default	1058.33	470	588.333
4	OgaKO	Fly 5	12/24 Default	1025.33	501.333	524
4	OgaKO	Fly 6	12/24 Default	963	468.667	494.333
4	OgaKO	Fly 7	12/24 Default	729.333	327.333	402
4	OgaKO	Fly 8	12/24 Default	550	270.667	279.333
4	OgaKO	Fly 9	12/24 Default	879.333	370.667	508.667
4	OgaKO	Fly 10	12/24 Default	1022.33	440.667	581.667
4	OgaKO	Fly 11	12/24 Default	815.333	337	478.333
4	OgaKO	Fly 12	12/24 Default	845.667	315.333	530.333
4	OgaKO	Fly 13	12/24 Default	1064.33	510.667	553.667
4	OgaKO	Fly 14	12/24 Default	825	342.667	482.333
4	OgaKO	Fly 15	12/24 Default	749.333	373.333	376
4	OgaKO	Fly 16	12/24 Default	979	441	538
4	OgaKO	Fly 17	12/24 Default	580	238.667	341.333
4	OgaKO	Fly 18	12/24 Default	688.667	261.667	427
4	OgaKO	Fly 19	12/24 Default	731.333	342	389.333
4	OgaKO	Fly 20	12/24 Default	1007.33	404.333	603
4	OgaKO	Fly 21	12/24 Default	668.667	364.333	304.333
4	OgaKO	Fly 22	12/24 Default	848.667	340	508.667
4	OgaKO	Fly 23	12/24 Default	954	452.667	501.333
4	OgaKO	Fly 24	12/24 Default	894.333	374.333	520
4	OgaKO	Fly 25	12/24 Default	1029	478	551
4	WT	Fly 1	12/24 Default	965.667	403	562.667
4	WT	Fly 2	12/24 Default	908.333	346.333	562
4	WT	Fly 3	12/24 Default	772.667	329	443.667
4	WT	Fly 4	12/24 Default	1058.67	462	596.667
4	WT	Fly 5	12/24 Default	1021.33	434.667	586.667
4	WT	Fly 6	12/24 Default	810.667	328.667	482
4	WT	Fly 7	12/24 Default	933.667	314	619.667
4	WT	Fly 8	12/24 Default	936	391.333	544.667
4	WT	Fly 9	12/24 Default	761	283	478
4	WT	Fly 10	12/24 Default	821.667	328.667	493
4	WT	Fly 11	12/24 Default	723	318.333	404.667
4	WT	Fly 12	12/24 Default	813.333	359	454.333
4	WT	Fly 13	12/24 Default	846	322	524
4	WT	Fly 14	12/24 Default	863.667	304	559.667
4	WT	Fly 15	12/24 Default	1017.67	439	578.667
4	WT	Fly 16	12/24 Default	937.333	402.333	535
4	WT	Fly 17	12/24 Default	841	311.667	529.333
4	WT	Fly 18	12/24 Default	791.333	299.333	492
4	WT	Fly 19	12/24 Default	1069.33	479.333	590
4	WT	Fly 20	12/24 Default	1080	466	614
4	WT	Fly 21	12/24 Default	937.667	404.333	533.333
4	WT	Fly 22	12/24 Default	1099.33	493.667	605.667
4	WT	Fly 23	12/24 Default	964	360.333	603.667
4	WT	Fly 24	12/24 Default	1022.67	443.667	579
4	WT	Fly 25	12/24 Default	852	362.333	489.667
4	WT	Fly 26	12/24 Default	783.333	264.333	519
4	C941Y;OgaKO	Fly 1	12/24 Default	1144.33	498.333	646
4	C941Y;OgaKO	Fly 2	12/24 Default	824.667	292.667	532
4	C941Y;OgaKO	Fly 3	12/24 Default	1257.33	584.667	672.667
4	C941Y;OgaKO	Fly 4	12/24 Default	1046.33	451.333	595
4	C941Y;OgaKO	Fly 5	12/24 Default	1203.67	528	675.667
4	C941Y;OgaKO	Fly 6	12/24 Default	920	406.333	513.667
4	C941Y;OgaKO	Fly 7	12/24 Default	1077.67	417.667	660
4	C941Y;OgaKO	Fly 8	12/24 Default	848.333	262.667	585.667
4	C941Y;OgaKO	Fly 9	12/24 Default	942.667	376.333	566.333
4	C941Y;OgaKO	Fly 10	12/24 Default	1096	462	634
4	C941Y;OgaKO	Fly 11	12/24 Default	1048	386	662
4	C941Y;OgaKO	Fly 12	12/24 Default	912.667	365.667	547
4	C941Y;OgaKO	Fly 13	12/24 Default	745.667	304.333	441.333
4	C941Y;OgaKO	Fly 14	12/24 Default	787.333	298.667	488.667
4	C941Y;OgaKO	Fly 15	12/24 Default	950	419.667	530.333
4	C941Y;OgaKO	Fly 16	12/24 Default	1086.33	419.333	667
4	C941Y;OgaKO	Fly 17	12/24 Default	945	357	588
5	C941Y	Fly 1	12/24 Default	971.667	431.333	540.333
5	C941Y	Fly 2	12/24 Default	779.333	318	461.333
5	C941Y	Fly 3	12/24 Default	560.333	220.333	340
5	C941Y	Fly 4	12/24 Default	686.667	265	421.667
5	C941Y	Fly 5	12/24 Default	952.333	383.667	568.667
5	C941Y	Fly 6	12/24 Default	972.667	355	617.667
5	C941Y	Fly 7	12/24 Default	911	381.333	529.667
5	C941Y	Fly 8	12/24 Default	681	252	429
5	C941Y	Fly 9	12/24 Default	801	373.667	427.333
5	C941Y	Fly 10	12/24 Default	880.667	332.333	548.333
5	C941Y	Fly 11	12/24 Default	844.667	356.667	488
5	C941Y	Fly 12	12/24 Default	910	351.667	558.333
5	C941Y	Fly 13	12/24 Default	883.333	401.667	481.667
5	C941Y	Fly 14	12/24 Default	666	195	471
5	C941Y	Fly 15	12/24 Default	680.333	279.333	401
5	C941Y	Fly 16	12/24 Default	582	159	423
5	C941Y	Fly 17	12/24 Default	863.667	343.667	520
5	C941Y	Fly 18	12/24 Default	1016.67	504.333	512.333
5	C941Y	Fly 19	12/24 Default	797	340	457
5	C941Y	Fly 20	12/24 Default	912.667	320.667	592
5	C941Y	Fly 21	12/24 Default	884.333	426.667	457.667
5	OgaKO	Fly 1	12/24 Default	975.667	411.333	564.333
5	OgaKO	Fly 2	12/24 Default	817.333	320	497.333
5	OgaKO	Fly 3	12/24 Default	815	414.333	400.667
5	OgaKO	Fly 4	12/24 Default	948	450	498
5	OgaKO	Fly 5	12/24 Default	843	447	396
5	OgaKO	Fly 6	12/24 Default	1030.33	478.333	552
5	OgaKO	Fly 7	12/24 Default	1067.33	509	558.333
5	OgaKO	Fly 8	12/24 Default	1048.67	451.333	597.333
5	OgaKO	Fly 9	12/24 Default	990	516.667	473.333
5	OgaKO	Fly 10	12/24 Default	1095.33	479.667	615.667
5	OgaKO	Fly 11	12/24 Default	1151.33	556.333	595
5	OgaKO	Fly 12	12/24 Default	1056	524.667	531.333
5	OgaKO	Fly 13	12/24 Default	1079.67	536	543.667
5	OgaKO	Fly 14	12/24 Default	1046.67	511.667	535
5	OgaKO	Fly 15	12/24 Default	955.333	513	442.333
5	OgaKO	Fly 16	12/24 Default	1004.33	479.333	525
5	OgaKO	Fly 17	12/24 Default	917.667	438.333	479.333
5	OgaKO	Fly 18	12/24 Default	1106.67	513	593.667
5	OgaKO	Fly 19	12/24 Default	1043.33	511.333	532
5	OgaKO	Fly 20	12/24 Default	1058.67	528	530.667
5	OgaKO	Fly 21	12/24 Default	934.667	501	433.667
5	OgaKO	Fly 22	12/24 Default	1139	507.667	631.333
5	WT	Fly 1	12/24 Default	969	406.333	562.667
5	WT	Fly 2	12/24 Default	691.667	274	417.667
5	WT	Fly 3	12/24 Default	1080	436	644
5	WT	Fly 4	12/24 Default	918.333	378.667	539.667
5	WT	Fly 5	12/24 Default	838	355.667	482.333
5	WT	Fly 6	12/24 Default	1043.67	414	629.667
5	WT	Fly 7	12/24 Default	1144.67	496	648.667
5	WT	Fly 8	12/24 Default	861	413	448
5	WT	Fly 9	12/24 Default	1007.67	446.667	561
5	WT	Fly 10	12/24 Default	912.333	374.333	538
5	WT	Fly 11	12/24 Default	896	364.333	531.667
5	WT	Fly 12	12/24 Default	916.667	371.333	545.333
5	WT	Fly 13	12/24 Default	915.667	379	536.667
5	WT	Fly 14	12/24 Default	971.333	447.333	524
5	WT	Fly 15	12/24 Default	914.333	433.333	481
5	WT	Fly 16	12/24 Default	1263.67	624.667	639
5	WT	Fly 17	12/24 Default	863.667	368	495.667
5	WT	Fly 18	12/24 Default	952	440.667	511.333
5	WT	Fly 19	12/24 Default	1110.33	483.667	626.667
5	WT	Fly 20	12/24 Default	881.333	386.333	495
5	WT	Fly 21	12/24 Default	685	261.667	423.333
5	C941Y;OgaKO	Fly 1	12/24 Default	908.667	408.333	500.333
5	C941Y;OgaKO	Fly 2	12/24 Default	933	400.667	532.333
5	C941Y;OgaKO	Fly 3	12/24 Default	1135	509	626
5	C941Y;OgaKO	Fly 4	12/24 Default	1226.33	559.667	666.667
5	C941Y;OgaKO	Fly 5	12/24 Default	897	357.333	539.667
5	C941Y;OgaKO	Fly 6	12/24 Default	984.333	408	576.333
5	C941Y;OgaKO	Fly 7	12/24 Default	1015	388	627
5	C941Y;OgaKO	Fly 8	12/24 Default	831.333	318.667	512.667
5	C941Y;OgaKO	Fly 9	12/24 Default	1066	491	575
5	C941Y;OgaKO	Fly 10	12/24 Default	837.333	314.667	522.667
5	C941Y;OgaKO	Fly 11	12/24 Default	940.667	378.333	562.333
5	C941Y;OgaKO	Fly 12	12/24 Default	990.333	452.333	538
5	C941Y;OgaKO	Fly 13	12/24 Default	950.333	417	533.333
5	C941Y;OgaKO	Fly 14	12/24 Default	704.333	315.667	388.667
5	C941Y;OgaKO	Fly 15	12/24 Default	903.667	348.333	555.333
5	C941Y;OgaKO	Fly 16	12/24 Default	795.667	276	519.667
5	C941Y;OgaKO	Fly 17	12/24 Default	895.333	324.333	571

## Sheet: Average sleep bout duration
Rep	Group	Fly Number	Bin Length	24-hour bin	1st 12-hour bin	2nd 12-hour bin
3	OgaKO	Fly 1	12/24 Default	34.8834	30.6976	40.9775
3	OgaKO	Fly 2	12/24 Default	34.1825	22.7508	59.4372
3	OgaKO	Fly 3	12/24 Default	62.5134	59.8451	65.5633
3	OgaKO	Fly 4	12/24 Default	44.0078	57.1196	37.1326
3	OgaKO	Fly 5	12/24 Default	75.9468	53.7562	122.333
3	OgaKO	Fly 6	12/24 Default	44.0906	45.2762	42.375
3	OgaKO	Fly 7	12/24 Default	67.1106	64.3413	74.1934
3	OgaKO	Fly 8	12/24 Default	33.0173	29.7257	36.9009
3	OgaKO	Fly 9	12/24 Default	59.194	62.54	56.6993
3	OgaKO	Fly 10	12/24 Default	43.6841	48.9286	48.9143
3	OgaKO	Fly 11	12/24 Default	38.934	37.2165	42.6624
3	OgaKO	Fly 12	12/24 Default	84.2141	72.4306	107.143
3	OgaKO	Fly 13	12/24 Default	39.0646	40.0875	43.7644
3	OgaKO	Fly 14	12/24 Default	133.939	183.778	125.556
3	OgaKO	Fly 15	12/24 Default	123.353	101.722	186.967
3	OgaKO	Fly 16	12/24 Default	43.5236	53.2667	39.5603
3	OgaKO	Fly 17	12/24 Default	51.7382	60.8429	49.9905
3	OgaKO	Fly 18	12/24 Default	85.3508	95.5463	104.847
3	OgaKO	Fly 19	12/24 Default	103.341	74.981	173.722
3	OgaKO	Fly 20	12/24 Default	57.9725	49.2429	71.8657
3	OgaKO	Fly 21	12/24 Default	30.3235	29.9943	31.8023
3	OgaKO	Fly 22	12/24 Default	32.6992	27.7193	42.8096
3	OgaKO	Fly 23	12/24 Default	37.5394	47.8727	38.857
3	C941Y	Fly 1	12/24 Default	27.3516	34.8528	23.8731
3	C941Y	Fly 2	12/24 Default	18.583	12.3397	23.4206
3	C941Y	Fly 3	12/24 Default	29.1554	39.1085	23.6194
3	C941Y	Fly 4	12/24 Default	57.8072	41.2963	81.8631
3	C941Y	Fly 5	12/24 Default	16.0285	11.6598	19.9032
3	C941Y	Fly 6	12/24 Default	37.1946	21.6414	63.0917
3	C941Y	Fly 7	12/24 Default	34.1654	21.4266	49.7464
3	C941Y	Fly 8	12/24 Default	41.0741	33.0202	51.7937
3	C941Y	Fly 9	12/24 Default	32.3988	26.3675	40.0539
3	C941Y	Fly 10	12/24 Default	27.6185	25.7814	30.682
3	C941Y	Fly 11	12/24 Default	19.2068	21.9291	19.032
3	C941Y	Fly 12	12/24 Default	12.4602	10.2566	14.7872
3	C941Y	Fly 13	12/24 Default	40.998	36.685	48.052
3	C941Y	Fly 14	12/24 Default	35.8687	32.0926	44.6333
3	C941Y	Fly 15	12/24 Default	31.9695	22.5949	44.9715
3	C941Y	Fly 16	12/24 Default	24.8971	20.9283	34.1667
3	C941Y	Fly 17	12/24 Default	36.0041	34.8651	37.4829
3	C941Y	Fly 18	12/24 Default	32.0019	27.9396	37.0325
3	C941Y	Fly 19	12/24 Default	15.9614	11.5875	20.2786
3	C941Y	Fly 20	12/24 Default	24.8653	18.5582	31.8333
3	C941Y	Fly 21	12/24 Default	45.0829	38.7256	53.8393
3	C941Y	Fly 22	12/24 Default	39.9337	32.6237	54.8444
3	C941Y	Fly 23	12/24 Default	18.3653	10.9841	24.3252
3	WT	Fly 1	12/24 Default	58.2175	59.5974	61.0644
3	WT	Fly 2	12/24 Default	46.2037	28.0518	70.5672
3	WT	Fly 3	12/24 Default	68.5535	52.3667	98.4889
3	WT	Fly 4	12/24 Default	38.5164	30.2137	61.1583
3	WT	Fly 5	12/24 Default	71.9311	60.0417	106.847
3	WT	Fly 6	12/24 Default	44.3874	55.2392	41.8205
3	WT	Fly 7	12/24 Default	53.3819	83.15	41.7113
3	WT	Fly 8	12/24 Default	36.0941	34.159	43.2556
3	WT	Fly 9	12/24 Default	69.3987	42.6449	128.315
3	WT	Fly 10	12/24 Default	64.0981	80.7284	59.1987
3	WT	Fly 11	12/24 Default	50.6753	52.3737	53.6712
3	WT	Fly 12	12/24 Default	44.7249	48.0333	44.6496
3	WT	Fly 13	12/24 Default	33.7748	42.6335	35.7
3	WT	Fly 14	12/24 Default	65.1662	41.0957	155.875
3	WT	Fly 15	12/24 Default	22.3738	25.2463	19.7943
3	WT	Fly 16	12/24 Default	33.1457	22.9091	51.0944
3	WT	Fly 17	12/24 Default	40.3881	36.9365	58.5806
3	WT	Fly 18	12/24 Default	95.1742	375.7	52.3
3	WT	Fly 19	12/24 Default	41.8454	37.5963	52.4186
3	WT	Fly 20	12/24 Default	77.7059	120.5	55.3194
3	C941Y;OgaKO	Fly 1	12/24 Default	56.4555	55.4256	60.1098
3	C941Y;OgaKO	Fly 2	12/24 Default	59.3089	39.9815	101.683
3	C941Y;OgaKO	Fly 3	12/24 Default	26.2246	22.9042	31.4603
3	C941Y;OgaKO	Fly 4	12/24 Default	35.3445	21.7083	62.6455
3	C941Y;OgaKO	Fly 5	12/24 Default	52.195	57.6444	78.649
3	C941Y;OgaKO	Fly 6	12/24 Default	60.4347	51.6019	68.6038
3	C941Y;OgaKO	Fly 7	12/24 Default	36.8925	31.3025	42.1333
3	C941Y;OgaKO	Fly 8	12/24 Default	33.6771	25.3243	44.4957
3	C941Y;OgaKO	Fly 9	12/24 Default	54.0755	66	52.8131
3	C941Y;OgaKO	Fly 10	12/24 Default	20.1225	13.1396	34.4116
3	C941Y;OgaKO	Fly 11	12/24 Default	44.3202	54.0857	42.1296
3	C941Y;OgaKO	Fly 12	12/24 Default	29.1158	32.377	27.1819
3	C941Y;OgaKO	Fly 13	12/24 Default	52.4853	43.787	65.7593
3	C941Y;OgaKO	Fly 14	12/24 Default	32.4341	26.4611	39.7724
3	C941Y;OgaKO	Fly 15	12/24 Default	38.883	31.9937	46.86
3	C941Y;OgaKO	Fly 16	12/24 Default	54.6278	48.3951	66.5108
3	C941Y;OgaKO	Fly 17	12/24 Default	37.9848	40.8417	40.0758
3	C941Y;OgaKO	Fly 18	12/24 Default	38.6698	34.0208	56.4444
3	C941Y;OgaKO	Fly 19	12/24 Default	71.7064	55.619	94.4683
3	C941Y;OgaKO	Fly 20	12/24 Default	47.045	38.3278	61.7646
3	C941Y;OgaKO	Fly 21	12/24 Default	46.0484	29.3133	77.7828
3	C941Y;OgaKO	Fly 22	12/24 Default	41.5536	32.1563	55.2165
2	WT	Fly 1	12/24 Default	27.4711	15.3428	48.3556
2	WT	Fly 2	12/24 Default	28.8235	27.7603	32.3508
2	WT	Fly 3	12/24 Default	57.3696	41.4794	89.8167
2	WT	Fly 4	12/24 Default	35.8652	22.333	82.3468
2	WT	Fly 5	12/24 Default	37.3274	48.8539	31.8389
2	WT	Fly 6	12/24 Default	38.7995	35.7877	49.2471
2	WT	Fly 7	12/24 Default	39.5347	42.8022	39.0416
2	WT	Fly 8	12/24 Default	53.7349	43.7444	66.67
2	WT	Fly 9	12/24 Default	37.2991	26.7197	50.9389
2	WT	Fly 10	12/24 Default	50.7659	30.4302	104.396
2	WT	Fly 11	12/24 Default	28.4228	27.1389	29.4002
2	WT	Fly 12	12/24 Default	46.9006	37.3889	57.0907
2	WT	Fly 13	12/24 Default	37.5321	33.8222	42.6034
2	WT	Fly 14	12/24 Default	55.3361	58.7312	61.9298
2	WT	Fly 15	12/24 Default	51.1569	41.6587	98.3889
2	WT	Fly 16	12/24 Default	101.695	55.9343	261.5
2	WT	Fly 17	12/24 Default	59.4921	48.4583	72.8333
2	WT	Fly 18	12/24 Default	24.6114	25.649	24.0571
2	WT	Fly 19	12/24 Default	50.474	32.7934	106.083
2	WT	Fly 20	12/24 Default	116.505	79.6667	180.222
2	WT	Fly 21	12/24 Default	27.652	25.1872	35.3307
2	WT	Fly 22	12/24 Default	74.504	54.9913	114.689
2	OgaKO	Fly 1	12/24 Default	45.3266	43.0879	63.4639
2	OgaKO	Fly 2	12/24 Default	38.0186	40.4481	41.4194
2	OgaKO	Fly 3	12/24 Default	43.4481	51.4216	37.2121
2	OgaKO	Fly 4	12/24 Default	25.5128	22.0093	30.2402
2	OgaKO	Fly 5	12/24 Default	42.5187	44.9858	46.1121
2	OgaKO	Fly 6	12/24 Default	57.7355	45.8611	97.0386
2	OgaKO	Fly 7	12/24 Default	33.7873	41.3237	29.1368
2	OgaKO	Fly 8	12/24 Default	26.6801	24.0013	30.928
2	OgaKO	Fly 9	12/24 Default	15.9824	15.8365	16.2167
2	OgaKO	Fly 10	12/24 Default	67.561	92.5344	58.5194
2	OgaKO	Fly 11	12/24 Default	68.3056	80.1772	63.2811
2	OgaKO	Fly 12	12/24 Default	38.1529	38.5229	39.997
2	OgaKO	Fly 13	12/24 Default	26.3514	33.6389	22.0185
2	OgaKO	Fly 14	12/24 Default	47.0532	43.4524	53.8274
2	OgaKO	Fly 15	12/24 Default	49.1132	33.7704	83.5167
2	OgaKO	Fly 16	12/24 Default	33.673	42.1667	33.7414
2	OgaKO	Fly 17	12/24 Default	46.8384	83.8889	36.3333
2	OgaKO	Fly 18	12/24 Default	42.7569	88.8642	29.8077
2	OgaKO	Fly 19	12/24 Default	27.13	23.356	30.386
2	OgaKO	Fly 20	12/24 Default	27.6909	38.7143	22.7199
2	OgaKO	Fly 21	12/24 Default	30.2893	43.6579	22.9707
2	OgaKO	Fly 22	12/24 Default	39.1325	42.5079	42.3698
2	OgaKO	Fly 23	12/24 Default	20.7519	21.463	21.0894
2	OgaKO	Fly 24	12/24 Default	16.4898	22.6389	13.0194
2	OgaKO	Fly 25	12/24 Default	90.4813	103.883	81.3389
2	C941Y;OgaKO	Fly 1	12/24 Default	30.6189	26.4294	42.8915
2	C941Y;OgaKO	Fly 2	12/24 Default	30.5202	34.1918	28.89
2	C941Y;OgaKO	Fly 3	12/24 Default	24.9254	32.261	20.0185
2	C941Y;OgaKO	Fly 4	12/24 Default	31.7399	45.6566	26.4164
2	C941Y;OgaKO	Fly 5	12/24 Default	38.2301	24.8307	244.75
2	C941Y;OgaKO	Fly 6	12/24 Default	28.7592	19.5427	38.4018
2	C941Y;OgaKO	Fly 7	12/24 Default	29.7693	22.1625	40.2153
2	C941Y;OgaKO	Fly 8	12/24 Default	54.9754	44.6724	287.333
2	C941Y;OgaKO	Fly 9	12/24 Default	21.7167	24.3043	19.8444
2	C941Y;OgaKO	Fly 10	12/24 Default	32.8557	31.7845	35.0826
2	C941Y;OgaKO	Fly 11	12/24 Default	30.1246	23.7076	37.26
2	C941Y;OgaKO	Fly 12	12/24 Default	49.0249	56.878	45.8094
2	C941Y;OgaKO	Fly 13	12/24 Default	55.4269	68.2976	48.9516
2	C941Y;OgaKO	Fly 14	12/24 Default	26.4589	27.0333	26.3049
2	C941Y;OgaKO	Fly 15	12/24 Default	40.1405	41.8036	39.6292
2	C941Y;OgaKO	Fly 16	12/24 Default	30.5032	56.15	25.307
2	C941Y;OgaKO	Fly 17	12/24 Default	32.8603	34.0708	31.8483
2	C941Y;OgaKO	Fly 18	12/24 Default	40.5731	26.6016	96.6925
2	C941Y	Fly 1	12/24 Default	46.3044	56.9913	49.6988
2	C941Y	Fly 2	12/24 Default	24.5125	23.1984	26.4824
2	C941Y	Fly 3	12/24 Default	27.4409	30.402	24.8062
2	C941Y	Fly 4	12/24 Default	18.3311	15.4639	22.5132
2	C941Y	Fly 5	12/24 Default	33.2274	29.1275	47.8106
2	C941Y	Fly 6	12/24 Default	44.5142	32.7898	64.1435
2	C941Y	Fly 7	12/24 Default	21.9021	27.082	18.8909
2	C941Y	Fly 8	12/24 Default	17.9549	16.1296	19.7475
2	C941Y	Fly 9	12/24 Default	23.4603	25.3874	22.2665
2	C941Y	Fly 10	12/24 Default	31.2247	26.3952	36.8707
2	C941Y	Fly 11	12/24 Default	19.2922	17.1797	20.8568
2	C941Y	Fly 12	12/24 Default	23.7811	25.33	23.1185
2	C941Y	Fly 13	12/24 Default	17.9344	16.9702	19.9158
2	C941Y	Fly 14	12/24 Default	34.6858	32.0566	37.3089
2	C941Y	Fly 15	12/24 Default	26.3376	33.5861	22.6657
2	C941Y	Fly 16	12/24 Default	26.1308	21.1992	32.8675
2	C941Y	Fly 17	12/24 Default	25.0582	27.6492	24.958
2	C941Y	Fly 18	12/24 Default	34.4706	35.9643	33.907
2	C941Y	Fly 19	12/24 Default	40.9338	33.4947	50.9222
2	C941Y	Fly 20	12/24 Default	38.5894	30.1253	45.9154
2	C941Y	Fly 21	12/24 Default	30.7931	19.4653	47.3004
2	C941Y	Fly 22	12/24 Default	32.1558	29.6052	35.1937
2	C941Y	Fly 23	12/24 Default	30.0278	25.2744	39.0516
2	C941Y	Fly 24	12/24 Default	39.4249	37.0556	44.0838
2	C941Y	Fly 25	12/24 Default	14.5438	10.5019	17.8442
4	C941Y	Fly 1	12/24 Default	39.4217	45.2893	40.506
4	C941Y	Fly 2	12/24 Default	52.0002	34.6496	85.7417
4	C941Y	Fly 3	12/24 Default	24.9771	27.6344	23.0678
4	C941Y	Fly 4	12/24 Default	49.1338	43.1077	62.2955
4	C941Y	Fly 5	12/24 Default	22.8575	21.9744	25.7716
4	C941Y	Fly 6	12/24 Default	32.8024	34.1896	33.1197
4	C941Y	Fly 7	12/24 Default	29.5685	21.3373	42.0306
4	C941Y	Fly 8	12/24 Default	34.3017	37.05	33.0029
4	C941Y	Fly 9	12/24 Default	28.9662	26.0921	33.1875
4	C941Y	Fly 10	12/24 Default	26.633	16.1959	48.6369
4	C941Y	Fly 11	12/24 Default	22.2831	15.6034	30.5248
4	C941Y	Fly 12	12/24 Default	34.8486	37.6075	33.5233
4	C941Y	Fly 13	12/24 Default	23.3417	24.3585	22.8651
4	C941Y	Fly 14	12/24 Default	29.178	19.1323	47.7473
4	C941Y	Fly 15	12/24 Default	47.1633	42.7276	54.7852
4	C941Y	Fly 16	12/24 Default	31.9048	19.1053	56.5481
4	C941Y	Fly 17	12/24 Default	23.8613	29.2083	23.691
4	C941Y	Fly 18	12/24 Default	53.0587	39.75	80.125
4	C941Y	Fly 19	12/24 Default	35.8974	29.5768	41.7741
4	C941Y	Fly 20	12/24 Default	37.0166	40.0333	43.2496
4	C941Y	Fly 21	12/24 Default	33.5793	59.2288	25.6004
4	C941Y	Fly 22	12/24 Default	38.5261	27.1667	52.6296
4	C941Y	Fly 23	12/24 Default	24.4051	27.6431	24.1225
4	C941Y	Fly 24	12/24 Default	40.331	29.6044	254.15
4	C941Y	Fly 25	12/24 Default	30.9403	18.902	51.5361
4	OgaKO	Fly 1	12/24 Default	50.5911	44.3642	67.3056
4	OgaKO	Fly 2	12/24 Default	68.4563	69.3	78.0595
4	OgaKO	Fly 3	12/24 Default	39.0995	27.4242	58.6333
4	OgaKO	Fly 4	12/24 Default	42.7944	33.2653	59.1528
4	OgaKO	Fly 5	12/24 Default	34.609	37.8737	32.9121
4	OgaKO	Fly 6	12/24 Default	24.0012	37.4281	18.6917
4	OgaKO	Fly 7	12/24 Default	33.9134	34.4028	34.6546
4	OgaKO	Fly 8	12/24 Default	39.7497	48.3429	35.1071
4	OgaKO	Fly 9	12/24 Default	44.542	34.0476	59.5444
4	OgaKO	Fly 10	12/24 Default	63.5003	50.7952	81.2222
4	OgaKO	Fly 11	12/24 Default	55.0284	48.5682	61.078
4	OgaKO	Fly 12	12/24 Default	36.4649	28.6131	47.7194
4	OgaKO	Fly 13	12/24 Default	55.6423	49.7281	63.5635
4	OgaKO	Fly 14	12/24 Default	33.2948	28.3974	39.3939
4	OgaKO	Fly 15	12/24 Default	34.1003	30.9758	40.7619
4	OgaKO	Fly 16	12/24 Default	43.5538	60.9963	40.6644
4	OgaKO	Fly 17	12/24 Default	32.5718	43.2222	31.1059
4	OgaKO	Fly 18	12/24 Default	40.0787	31.0709	50.1005
4	OgaKO	Fly 19	12/24 Default	37.9482	35.3639	47.0232
4	OgaKO	Fly 20	12/24 Default	36.9655	34.4233	66.938
4	OgaKO	Fly 21	12/24 Default	50.6494	48.8038	64.9259
4	OgaKO	Fly 22	12/24 Default	33.2914	24.0621	54.0591
4	OgaKO	Fly 23	12/24 Default	45.4374	47.8152	44.3111
4	OgaKO	Fly 24	12/24 Default	53.5948	42.8929	66.4857
4	OgaKO	Fly 25	12/24 Default	50.3333	60.5	69.3306
4	WT	Fly 1	12/24 Default	77.3586	54.937	164.833
4	WT	Fly 2	12/24 Default	60.5016	33.2447	124.556
4	WT	Fly 3	12/24 Default	56.5139	34.7343	124.944
4	WT	Fly 4	12/24 Default	111.573	56.7126	490
4	WT	Fly 5	12/24 Default	70.7966	48.3394	114.278
4	WT	Fly 6	12/24 Default	24.4348	22.6154	29.0063
4	WT	Fly 7	12/24 Default	79.5152	33.987	318.238
4	WT	Fly 8	12/24 Default	43.0934	38.0341	58.8357
4	WT	Fly 9	12/24 Default	24.6599	22.6819	31.5754
4	WT	Fly 10	12/24 Default	44.0916	29.3278	67.3393
4	WT	Fly 11	12/24 Default	50.179	42.7212	74.3381
4	WT	Fly 12	12/24 Default	52.4536	34.6688	94.1222
4	WT	Fly 13	12/24 Default	69.3333	37.8889	177.778
4	WT	Fly 14	12/24 Default	32.0756	19.6587	61.8889
4	WT	Fly 15	12/24 Default	56.6604	42.1912	93.0926
4	WT	Fly 16	12/24 Default	45.0198	28.2399	90.3619
4	WT	Fly 17	12/24 Default	55.0735	32.1444	94.9667
4	WT	Fly 18	12/24 Default	35.0027	22.7893	52.2778
4	WT	Fly 19	12/24 Default	76.8903	50.9583	131.528
4	WT	Fly 20	12/24 Default	80.9333	69.7228	142.378
4	WT	Fly 21	12/24 Default	53.2917	47.2619	74.6825
4	WT	Fly 22	12/24 Default	64.4834	37.7845	228.3
4	WT	Fly 23	12/24 Default	56.2797	33.8667	133.343
4	WT	Fly 24	12/24 Default	61.6629	66.3095	59.0228
4	WT	Fly 25	12/24 Default	52.5507	38.4907	78.763
4	WT	Fly 26	12/24 Default	49.2064	29.3704	86.7652
4	C941Y;OgaKO	Fly 1	12/24 Default	66.8465	49.344	118.811
4	C941Y;OgaKO	Fly 2	12/24 Default	20.73	18.9153	21.9372
4	C941Y;OgaKO	Fly 3	12/24 Default	64.4676	63.5486	68.9004
4	C941Y;OgaKO	Fly 4	12/24 Default	47.7032	36.4857	69.3049
4	C941Y;OgaKO	Fly 5	12/24 Default	74.0792	50.8254	122.333
4	C941Y;OgaKO	Fly 6	12/24 Default	31.232	26.6801	38.9461
4	C941Y;OgaKO	Fly 7	12/24 Default	49.6281	25.015	136.444
4	C941Y;OgaKO	Fly 8	12/24 Default	40.3456	20.6255	74.3556
4	C941Y;OgaKO	Fly 9	12/24 Default	36.8246	24.2418	88.4512
4	C941Y;OgaKO	Fly 10	12/24 Default	59.643	30.6297	217.044
4	C941Y;OgaKO	Fly 11	12/24 Default	62.9943	28.246	230.522
4	C941Y;OgaKO	Fly 12	12/24 Default	30.7935	32.8603	31.4797
4	C941Y;OgaKO	Fly 13	12/24 Default	17.0277	14.9383	19.103
4	C941Y;OgaKO	Fly 14	12/24 Default	37.6795	23.9291	60.1667
4	C941Y;OgaKO	Fly 15	12/24 Default	19.2725	15.4573	24.5256
4	C941Y;OgaKO	Fly 16	12/24 Default	73.3102	41.8577	187.5
4	C941Y;OgaKO	Fly 17	12/24 Default	24.1692	14.6595	38.6575
5	C941Y	Fly 1	12/24 Default	38.9357	26.7332	60.9606
5	C941Y	Fly 2	12/24 Default	27.9253	24.0817	36.9452
5	C941Y	Fly 3	12/24 Default	35.6809	25.85	58.0404
5	C941Y	Fly 4	12/24 Default	26.0011	21.7861	30.0024
5	C941Y	Fly 5	12/24 Default	69.0667	40.4411	144.028
5	C941Y	Fly 6	12/24 Default	46.786	26.347	122.944
5	C941Y	Fly 7	12/24 Default	40.0578	35.231	61.4769
5	C941Y	Fly 8	12/24 Default	48.7892	30.5926	76.4722
5	C941Y	Fly 9	12/24 Default	32.1614	29.2343	36.7825
5	C941Y	Fly 10	12/24 Default	42.6106	25.5839	73.7315
5	C941Y	Fly 11	12/24 Default	51.6253	37.5944	74.1349
5	C941Y	Fly 12	12/24 Default	44.529	34.3434	54.8167
5	C941Y	Fly 13	12/24 Default	50.0619	41.359	63.4762
5	C941Y	Fly 14	12/24 Default	47.4306	27.9228	69.1167
5	C941Y	Fly 15	12/24 Default	62.3429	54.1583	74.8333
5	C941Y	Fly 16	12/24 Default	21.4364	18.2143	23.1992
5	C941Y	Fly 17	12/24 Default	43.5701	46.9182	42.6222
5	C941Y	Fly 18	12/24 Default	29.421	49.4473	21.4574
5	C941Y	Fly 19	12/24 Default	31.2926	27.8095	38.9105
5	C941Y	Fly 20	12/24 Default	34.721	18.2026	68.8417
5	C941Y	Fly 21	12/24 Default	52.3111	45.0139	64.5159
5	OgaKO	Fly 1	12/24 Default	47.9171	57.3097	43.4551
5	OgaKO	Fly 2	12/24 Default	39.5413	30.9364	48.2152
5	OgaKO	Fly 3	12/24 Default	53.2542	60.6815	51.2714
5	OgaKO	Fly 4	12/24 Default	49.7971	51.1222	50.1664
5	OgaKO	Fly 5	12/24 Default	96.1905	173.167	69.55
5	OgaKO	Fly 6	12/24 Default	169.3	148.167	213.667
5	OgaKO	Fly 7	12/24 Default	48.5879	53.4175	45.3104
5	OgaKO	Fly 8	12/24 Default	89.5229	122.148	86.7837
5	OgaKO	Fly 9	12/24 Default	77.6766	85.9	73.4833
5	OgaKO	Fly 10	12/24 Default	79.727	99.4921	93.1389
5	OgaKO	Fly 11	12/24 Default	82.5175	169.681	58.4762
5	OgaKO	Fly 12	12/24 Default	186.046	348.333	129.417
5	OgaKO	Fly 13	12/24 Default	251.167	383.778	212.167
5	OgaKO	Fly 14	12/24 Default	86.8654	75.6571	105.188
5	OgaKO	Fly 15	12/24 Default	144.004	168.921	189.151
5	OgaKO	Fly 16	12/24 Default	98.3977	94.6698	137.244
5	OgaKO	Fly 17	12/24 Default	120.089	206.956	114.722
5	OgaKO	Fly 18	12/24 Default	91.7025	136.069	73.9238
5	OgaKO	Fly 19	12/24 Default	138.064	170.5	143.936
5	OgaKO	Fly 20	12/24 Default	36.1326	43.4779	32.2482
5	OgaKO	Fly 21	12/24 Default	70.631	154.194	45.2652
5	OgaKO	Fly 22	12/24 Default	72.7162	54.7583	104.339
5	WT	Fly 1	12/24 Default	59.2413	39.837	93.8889
5	WT	Fly 2	12/24 Default	26.9825	23.3059	30.9665
5	WT	Fly 3	12/24 Default	86.8886	75.1833	126.625
5	WT	Fly 4	12/24 Default	59.2195	38.0833	110.05
5	WT	Fly 5	12/24 Default	73.098	64.2583	82.4698
5	WT	Fly 6	12/24 Default	77.4888	36.2824	420.167
5	WT	Fly 7	12/24 Default	172.795	150.417	103
5	WT	Fly 8	12/24 Default	98.7792	92.0833	119.064
5	WT	Fly 9	12/24 Default	71.4615	53.662	98.85
5	WT	Fly 10	12/24 Default	39.8588	38.4053	41.5139
5	WT	Fly 11	12/24 Default	65.3033	50.7905	90.0349
5	WT	Fly 12	12/24 Default	44.056	46.4087	43.0402
5	WT	Fly 13	12/24 Default	58.6875	45.6806	78.498
5	WT	Fly 14	12/24 Default	71.384	58.6361	103.167
5	WT	Fly 15	12/24 Default	55.1196	54.7922	65.7476
5	WT	Fly 16	12/24 Default	107.308	244.778	76.8616
5	WT	Fly 17	12/24 Default	132.35	74.4111	295.889
5	WT	Fly 18	12/24 Default	53.3671	37.7818	87.4167
5	WT	Fly 19	12/24 Default	84.8344	56.0289	163.694
5	WT	Fly 20	12/24 Default	23.265	26.0238	23.0783
5	WT	Fly 21	12/24 Default	51.7262	72.6111	49.5333
5	C941Y;OgaKO	Fly 1	12/24 Default	68.0778	53.5083	99.1667
5	C941Y;OgaKO	Fly 2	12/24 Default	31.6087	25.7927	38.1111
5	C941Y;OgaKO	Fly 3	12/24 Default	56.9209	40.3783	86.1778
5	C941Y;OgaKO	Fly 4	12/24 Default	64.3383	64.8513	66.1905
5	C941Y;OgaKO	Fly 5	12/24 Default	46.4981	32.5394	70.1667
5	C941Y;OgaKO	Fly 6	12/24 Default	66.4172	42.2741	114.567
5	C941Y;OgaKO	Fly 7	12/24 Default	37.2506	22.8706	63.8803
5	C941Y;OgaKO	Fly 8	12/24 Default	59.381	38.7655	96.4206
5	C941Y;OgaKO	Fly 9	12/24 Default	39.3156	87.4691	35.3922
5	C941Y;OgaKO	Fly 10	12/24 Default	60.1852	52.2222	69.1303
5	C941Y;OgaKO	Fly 11	12/24 Default	36.2962	20.5747	78.6389
5	C941Y;OgaKO	Fly 12	12/24 Default	31.8695	28.4231	35.7202
5	C941Y;OgaKO	Fly 13	12/24 Default	32.1898	23.2058	51.6154
5	C941Y;OgaKO	Fly 14	12/24 Default	24.0168	28.3036	22.2505
5	C941Y;OgaKO	Fly 15	12/24 Default	50.0271	31.7639	77.7926
5	C941Y;OgaKO	Fly 16	12/24 Default	42.5711	25.5929	67.4246
5	C941Y;OgaKO	Fly 17	12/24 Default	41.6702	26.4686	66.125
