# Supplementary material for: Rescuable sleep and synaptogenesis phenotypes in a Drosophila model of O-GlcNAc transferase intellectual disability
Source: eLife. 2024 Nov 13;13:e90376. doi: 10.7554/eLife.90376 (PMC11623933; doi:10.7554/eLife.90376)
Supplement: Figure 6—source data 2. [file elife-90376-fig6-data2.xlsx]

## Sheet: Mean Sleep Bout Duration
Repeat	Group	FlyNumber	BinLength	24h	1st12h	2nd12h
1	WT	Fly 1	12/24 Default	45.4486	27.4029	100.917
1	WT	Fly 2	12/24 Default	19.3463	14.1361	26.039
1	WT	Fly 3	12/24 Default	33.0012	34.2609	35.3699
1	WT	Fly 4	12/24 Default	36.532	36.0656	38.6576
1	WT	Fly 5	12/24 Default	46.6186	34.0157	71.3476
1	WT	Fly 6	12/24 Default	51.2386	31.6722	102.611
1	WT	Fly 7	12/24 Default	33.6777	28.9846	41.3889
1	WT	Fly 8	12/24 Default	40.1751	34.8365	49.7649
1	WT	Fly 9	12/24 Default	35.511	26.7073	48.7273
1	WT	Fly 10	12/24 Default	37.0865	33.0718	41.5333
1	WT	Fly 11	12/24 Default	40.3358	46.5613	37.127
1	WT	Fly 12	12/24 Default	34.6723	37.9023	34.458
1	WT	Fly 13	12/24 Default	40.0227	53.0741	33.8917
1	WT	Fly 14	12/24 Default	46.9487	35.5178	71.4192
1	WT	Fly 15	12/24 Default	33.2019	15.2045	117.367
1	WT	Fly 16	12/24 Default	31.7081	25.6075	37.1422
1	WT	Fly 17	12/24 Default	28.6578	24.7677	33.4025
1	WT	Fly 18	12/24 Default	33.7983	42.1624	33.4417
1	C941Y	Fly 1	12/24 Default	19.2	13.5695	23.7843
1	C941Y	Fly 2	12/24 Default	34.8924	24.8053	51.6581
1	C941Y	Fly 3	12/24 Default	15.8102	15.0057	16.5315
1	C941Y	Fly 4	12/24 Default	10.9473	8.8492	11.7853
1	C941Y	Fly 5	12/24 Default	37.6733	28.4813	55.0556
1	C941Y	Fly 6	12/24 Default	27.9001	21.3357	36.6619
1	C941Y	Fly 7	12/24 Default	17.4184	14.3688	22.3058
1	C941Y	Fly 8	12/24 Default	15.9331	15.0666	17.8436
1	C941Y	Fly 9	12/24 Default	34.8486	19.4907	132.972
1	C941Y	Fly 10	12/24 Default	50.0398	32.2641	110.896
1	C941Y	Fly 11	12/24 Default	37.0161	40.0185	35.8185
1	C941Y	Fly 12	12/24 Default	32.6313	27.8676	38.9589
1	C941Y	Fly 13	12/24 Default	36.5807	25.8711	49.6637
1	C941Y	Fly 14	12/24 Default	17.1568	13.8002	20.1826
1	C941Y	Fly 15	12/24 Default	22.9094	13.9816	35.7595
1	C941Y	Fly 16	12/24 Default	25.9969	25.0125	27.0588
1	C941Y	Fly 17	12/24 Default	33.2192	32.9142	37.5329
1	C941Y	Fly 18	12/24 Default	19.5934	10.4723	27.3368
1	C941Y	Fly 19	12/24 Default	45.2766	40.0753	59.8903
1	C941Y3mMTMG	Fly 1	12/24 Default	15.8189	13.7886	17.2752
1	C941Y3mMTMG	Fly 2	12/24 Default	27.407	18.5826	41.3883
1	C941Y3mMTMG	Fly 3	12/24 Default	13.5401	12.0989	15.8189
1	C941Y3mMTMG	Fly 4	12/24 Default	45.3658	26.8928	91.5556
1	C941Y3mMTMG	Fly 5	12/24 Default	38.781	40.0537	38.4222
1	C941Y3mMTMG	Fly 6	12/24 Default	38.7118	23.689	102.465
1	C941Y3mMTMG	Fly 7	12/24 Default	46.7772	25.4157	88.1667
1	C941Y3mMTMG	Fly 8	12/24 Default	18.3093	13.5579	25.267
1	C941Y3mMTMG	Fly 9	12/24 Default	20.536	16.7832	26.0342
1	C941Y3mMTMG	Fly 10	12/24 Default	18.2371	17.1171	19.463
1	C941Y3mMTMG	Fly 11	12/24 Default	14.2341	15.2374	14.4017
1	C941Y3mMTMG	Fly 12	12/24 Default	12.7511	8.4706	16.1754
1	C941Y3mMTMG	Fly 13	12/24 Default	50.2202	38.9613	259.462
2	C941Y	Fly 1	12/24 Default	24.4847	21.6069	43.7686
2	C941Y	Fly 2	12/24 Default	28.1172	20.4945	43.4735
2	C941Y	Fly 3	12/24 Default	38.8687	29.482	55.4471
2	C941Y	Fly 4	12/24 Default	39	34.8201	43.935
2	C941Y	Fly 5	12/24 Default	19.3565	16.6647	22.6067
2	C941Y	Fly 6	12/24 Default	29.9063	18.0194	55.4487
2	C941Y	Fly 7	12/24 Default	40.1842	27.3483	72.2857
2	C941Y	Fly 8	12/24 Default	29.9198	22.1998	45.2329
2	C941Y	Fly 9	12/24 Default	32.1827	22.8786	48.7637
2	C941Y	Fly 10	12/24 Default	27.7971	18.0972	50.2239
2	C941Y	Fly 11	12/24 Default	58.2407	33.4359	142.022
2	C941Y	Fly 12	12/24 Default	29.4436	22.6564	38.4885
2	C941Y	Fly 13	12/24 Default	35.3007	30.9129	43.6414
2	C941Y	Fly 14	12/24 Default	36.1718	21.7941	58.8814
2	C941Y	Fly 15	12/24 Default	30.8723	18.8667	53.6866
2	C941Y	Fly 16	12/24 Default	34.9937	37.7956	33.3393
2	C941Y	Fly 17	12/24 Default	20.7051	19.5926	22.0904
2	C941Y	Fly 18	12/24 Default	40.4173	27.7794	63.0333
2	C941Y3mMTMG	Fly 1	12/24 Default	33.8437	26.3298	46.9861
2	C941Y3mMTMG	Fly 2	12/24 Default	16.7827	11.1128	22.6173
2	C941Y3mMTMG	Fly 3	12/24 Default	27.5808	28.4623	31.7997
2	C941Y3mMTMG	Fly 4	12/24 Default	19.2285	20.2144	18.5175
2	C941Y3mMTMG	Fly 5	12/24 Default	39.8872	32.2853	56.9352
2	C941Y3mMTMG	Fly 6	12/24 Default	35.6341	26.5983	49.8222
2	C941Y3mMTMG	Fly 7	12/24 Default	46.7604	33.5984	88.7441
2	C941Y3mMTMG	Fly 8	12/24 Default	56.846	36.1342	102.898
2	C941Y3mMTMG	Fly 9	12/24 Default	37.3465	35.3414	43.5217
2	C941Y3mMTMG	Fly 10	12/24 Default	22.6973	19.75	26.9313
2	C941Y3mMTMG	Fly 11	12/24 Default	36.0915	30.3464	43.1875
2	C941Y3mMTMG	Fly 12	12/24 Default	52.8558	43.2457	74.8111
2	C941Y3mMTMG	Fly 13	12/24 Default	36.9383	31.9556	43.6667
2	C941Y3mMTMG	Fly 14	12/24 Default	35.1521	36.2432	39.5784
2	C941Y3mMTMG	Fly 15	12/24 Default	33.6655	29.7783	39.2273
2	C941Y3mMTMG	Fly 16	12/24 Default	33.5986	29.1769	40.9983
2	C941Y3mMTMG	Fly 17	12/24 Default	32.734	20.8425	60.1167
2	C941Y3mMTMG	Fly 18	12/24 Default	37.2711	25.7375	58.0444
2	C941Y3mMTMG	Fly 19	12/24 Default	31.2233	27.1863	37.6421
2	C941Y3mMTMG	Fly 20	12/24 Default	43.0457	36.7576	58.2283
2	C941Y3mMTMG	Fly 21	12/24 Default	70.2725	61.7143	81.331
2	C941Y3mMTMG	Fly 22	12/24 Default	41.5099	35.106	49.5398
2	C941Y3mMTMG	Fly 23	12/24 Default	27.4425	21.2351	33.8875
2	C941Y3mMTMG	Fly 24	12/24 Default	46.9192	33.9643	75.4102
2	WT	Fly 1	12/24 Default	60.2538	50.1566	129.617
2	WT	Fly 2	12/24 Default	58.2226	51.544	80.7106
2	WT	Fly 3	12/24 Default	33.8456	27.8028	41.6118
2	WT	Fly 4	12/24 Default	31.9024	21.7772	48.1363
2	WT	Fly 5	12/24 Default	57.1508	49.3111	130.298
2	WT	Fly 6	12/24 Default	39.2619	34.3803	44.7854
2	WT	Fly 7	12/24 Default	42.8296	38.9778	50.881
2	WT	Fly 8	12/24 Default	30.5899	28.3979	33.2544
2	WT	Fly 9	12/24 Default	32.2993	24.4316	46.3647
2	WT	Fly 10	12/24 Default	65.7159	48.4778	159.44
2	WT	Fly 11	12/24 Default	38.3213	42.4412	51.1294
2	WT	Fly 12	12/24 Default	62.0929	58.1111	73.4389
2	WT	Fly 13	12/24 Default	30.0705	18.0157	53.7196
2	WT	Fly 14	12/24 Default	37.545	25.7051	68.6391
2	WT	Fly 15	12/24 Default	28.1722	20.5	46.4393
2	WT	Fly 16	12/24 Default	36.7959	23.0902	80.0314
2	WT	Fly 17	12/24 Default	30.6828	22.7097	48.1905
2	WT	Fly 18	12/24 Default	51.0253	36.5895	103.761
2	WT	Fly 19	12/24 Default	23.6679	24.6304	22.9392
2	WT	Fly 20	12/24 Default	42.1061	31	58.6
3	WT	Fly 1	12/24 Default	23.7539	22.3132	25.1512
3	WT	Fly 2	12/24 Default	33.1757	25.1615	40.8902
3	WT	Fly 3	12/24 Default	37.9205	29.0421	47.1647
3	WT	Fly 4	12/24 Default	36.6827	28.3882	47.9578
3	WT	Fly 5	12/24 Default	41.6363	40.3	43.9435
3	WT	Fly 6	12/24 Default	42.0051	27.2301	67.3939
3	WT	Fly 7	12/24 Default	18.1325	11.3752	23.6904
3	WT	Fly 8	12/24 Default	44.7633	24.8423	145.875
3	WT	Fly 9	12/24 Default	72.5028	48.8381	117.244
3	WT	Fly 10	12/24 Default	27.305	21.5351	35.0983
3	WT	Fly 11	12/24 Default	60.6582	56.8889	76.2037
3	WT	Fly 12	12/24 Default	17.252	14.7727	19.3363
3	WT	Fly 13	12/24 Default	47.9311	34.8616	77.8296
3	WT	Fly 14	12/24 Default	33.5569	20.1389	61.4829
3	WT	Fly 15	12/24 Default	24.3294	17.0021	31.5658
3	WT	Fly 16	12/24 Default	31.201	21.2057	59.1805
3	WT	Fly 17	12/24 Default	42.9152	25.3241	83.0142
3	WT	Fly 18	12/24 Default	34.1433	14.0778	158.125
3	WT	Fly 19	12/24 Default	38.9311	21.5597	85.9697
3	WT	Fly 20	12/24 Default	55.4031	46.342	64.9022
3	WT	Fly 21	12/24 Default	26.0556	19.7852	31.1426
3	WT	Fly 22	12/24 Default	54.0393	23.6674	255.167
3	WT	Fly 23	12/24 Default	30.1977	24.089	36.9588
3	WT	Fly 24	12/24 Default	45.5598	29.5038	82.9833
3	WT	Fly 25	12/24 Default	50.4528	23.9043	118.944
3	C941Y	Fly 1	12/24 Default	36.5429	22.2157	76.2309
3	C941Y	Fly 2	12/24 Default	22.4462	17.9515	28.9763
3	C941Y	Fly 3	12/24 Default	25.6217	26.4472	25.4499
3	C941Y	Fly 4	12/24 Default	37.1713	27.257	61.032
3	C941Y	Fly 5	12/24 Default	23.0316	17.888	29.1275
3	C941Y	Fly 6	12/24 Default	30.575	24.7048	38.9907
3	C941Y	Fly 7	12/24 Default	60.3082	38.0897	124.497
3	C941Y	Fly 8	12/24 Default	44.3532	22.2619	310.796
3	C941Y	Fly 9	12/24 Default	28.7951	26.2825	32.4092
3	C941Y	Fly 10	12/24 Default	33.469	21.809	55.7407
3	C941Y	Fly 11	12/24 Default	24.9192	21.0344	29.7756
3	C941Y	Fly 12	12/24 Default	21.3809	16.0064	30.1459
3	C941Y	Fly 13	12/24 Default	25.8096	17.2207	38.9252
3	C941Y	Fly 14	12/24 Default	37.7011	33.5148	54.4083
3	C941Y	Fly 15	12/24 Default	30.1778	27.9199	33.0803
3	C941Y	Fly 16	12/24 Default	17.8842	10.4586	26.9326
3	C941Y	Fly 17	12/24 Default	33.7779	28.4182	40.2194
3	C941Y	Fly 18	12/24 Default	40.8519	27.667	69.0819
3	C941Y	Fly 19	12/24 Default	35.4281	19.4925	74.5051
3	C941Y	Fly 20	12/24 Default	27.5455	18.4963	46.2929
3	C941Y3mMTMG	Fly 1	12/24 Default	29.94	25.1335	35.403
3	C941Y3mMTMG	Fly 2	12/24 Default	30.9539	26.939	35.8518
3	C941Y3mMTMG	Fly 3	12/24 Default	25.6118	24.4173	26.6143
3	C941Y3mMTMG	Fly 4	12/24 Default	33.3336	25.7715	42.1249
3	C941Y3mMTMG	Fly 5	12/24 Default	19.9107	13.8208	27.4559
3	C941Y3mMTMG	Fly 6	12/24 Default	22.4092	13.1017	35.0533
3	C941Y3mMTMG	Fly 7	12/24 Default	31.0222	19.9429	54.575
3	C941Y3mMTMG	Fly 8	12/24 Default	33.7145	19.7491	72.05
3	C941Y3mMTMG	Fly 9	12/24 Default	28.2278	21.4167	36.4934
3	C941Y3mMTMG	Fly 10	12/24 Default	58.6287	36.3838	98.8492
3	C941Y3mMTMG	Fly 11	12/24 Default	30.0006	16.4967	51.7529
3	C941Y3mMTMG	Fly 12	12/24 Default	26.5917	15.9161	46.3333
3	C941Y3mMTMG	Fly 13	12/24 Default	38.2759	24.9909	63.7083
3	C941Y3mMTMG	Fly 14	12/24 Default	43.2416	45.606	44.8528
3	C941Y3mMTMG	Fly 15	12/24 Default	29.851	26.8519	33.3587
3	C941Y3mMTMG	Fly 16	12/24 Default	40.4648	20.7258	125.869
3	C941Y3mMTMG	Fly 17	12/24 Default	49.3739	27.056	103.15
3	C941Y3mMTMG	Fly 18	12/24 Default	47.6294	25.1417	174.122
3	C941Y3mMTMG	Fly 19	12/24 Default	33.1902	20.336	68.0545
3	C941Y3mMTMG	Fly 20	12/24 Default	35.2612	25.6449	56.4127
3	C941Y3mMTMG	Fly 21	12/24 Default	21.798	17.415	28.0742
3	C941Y3mMTMG	Fly 22	12/24 Default	32.1732	17.2304	140.298
3	C941Y3mMTMG	Fly 23	12/24 Default	62.3833	37.4722	287.368

## Sheet: Total Sleep
Repeat	Group	FlyNumber	BinLength	24h	1st12h	2nd12h
1	WT	Fly 1	12/24 Default	1065	464	601
1	WT	Fly 2	12/24 Default	864	340	524
1	WT	Fly 3	12/24 Default	934.667	379.667	555
1	WT	Fly 4	12/24 Default	758	334.667	423.333
1	WT	Fly 5	12/24 Default	869	378.667	490.333
1	WT	Fly 6	12/24 Default	1159.33	504	655.333
1	WT	Fly 7	12/24 Default	1085.67	491.333	594.333
1	WT	Fly 8	12/24 Default	1015.33	479	536.333
1	WT	Fly 9	12/24 Default	945	421	524
1	WT	Fly 10	12/24 Default	956.333	427	529.333
1	WT	Fly 11	12/24 Default	903.333	403.667	499.667
1	WT	Fly 12	12/24 Default	954	410.667	543.333
1	WT	Fly 13	12/24 Default	1079.67	507	572.667
1	WT	Fly 14	12/24 Default	905	394	511
1	WT	Fly 15	12/24 Default	904.333	326.333	578
1	WT	Fly 16	12/24 Default	920.667	344.667	576
1	WT	Fly 17	12/24 Default	869	384.667	484.333
1	WT	Fly 18	12/24 Default	796	350.333	445.667
1	C941Y	Fly 1	12/24 Default	653.333	214.333	439
1	C941Y	Fly 2	12/24 Default	1021	452	569
1	C941Y	Fly 3	12/24 Default	896	373.333	522.667
1	C941Y	Fly 4	12/24 Default	478.333	158	320.333
1	C941Y	Fly 5	12/24 Default	1155	540	615
1	C941Y	Fly 6	12/24 Default	1051	461	590
1	C941Y	Fly 7	12/24 Default	784.333	323.333	461
1	C941Y	Fly 8	12/24 Default	824	368.667	455.333
1	C941Y	Fly 9	12/24 Default	928.667	336.667	592
1	C941Y	Fly 10	12/24 Default	1085.33	456.333	629
1	C941Y	Fly 11	12/24 Default	1243	605.667	637.333
1	C941Y	Fly 12	12/24 Default	912.333	370.667	541.667
1	C941Y	Fly 13	12/24 Default	948	360.667	587.333
1	C941Y	Fly 14	12/24 Default	686.667	255	431.667
1	C941Y	Fly 15	12/24 Default	833	277	556
1	C941Y	Fly 16	12/24 Default	948	428	520
1	C941Y	Fly 17	12/24 Default	1015.67	434.333	581.333
1	C941Y	Fly 18	12/24 Default	591.667	139	452.667
1	C941Y	Fly 19	12/24 Default	879	363.333	515.667
1	C941Y3mMTMG	Fly 1	12/24 Default	441.667	164.333	277.333
1	C941Y3mMTMG	Fly 2	12/24 Default	924.667	361	563.667
1	C941Y3mMTMG	Fly 3	12/24 Default	550.667	256.333	294.333
1	C941Y3mMTMG	Fly 4	12/24 Default	1052.33	444.333	608
1	C941Y3mMTMG	Fly 5	12/24 Default	876.667	442.667	434
1	C941Y3mMTMG	Fly 6	12/24 Default	1190.67	532.333	658.333
1	C941Y3mMTMG	Fly 7	12/24 Default	937.333	326.667	610.667
1	C941Y3mMTMG	Fly 8	12/24 Default	565.667	194	371.667
1	C941Y3mMTMG	Fly 9	12/24 Default	531.667	242.667	289
1	C941Y3mMTMG	Fly 10	12/24 Default	344.667	159	185.667
1	C941Y3mMTMG	Fly 11	12/24 Default	585.333	230.667	354.667
1	C941Y3mMTMG	Fly 12	12/24 Default	435.333	114.667	320.667
1	C941Y3mMTMG	Fly 13	12/24 Default	1022	516	506
2	C941Y	Fly 1	12/24 Default	1024.33	473.667	550.667
2	C941Y	Fly 2	12/24 Default	899	367.333	531.667
2	C941Y	Fly 3	12/24 Default	983.667	415.333	568.333
2	C941Y	Fly 4	12/24 Default	1029	484.333	544.667
2	C941Y	Fly 5	12/24 Default	673	281.333	391.667
2	C941Y	Fly 6	12/24 Default	859.667	348	511.667
2	C941Y	Fly 7	12/24 Default	914	388.667	525.333
2	C941Y	Fly 8	12/24 Default	895.333	411.667	483.667
2	C941Y	Fly 9	12/24 Default	948.333	414.333	534
2	C941Y	Fly 10	12/24 Default	784.667	326.333	458.333
2	C941Y	Fly 11	12/24 Default	1027	449.333	577.667
2	C941Y	Fly 12	12/24 Default	751.333	310	441.333
2	C941Y	Fly 13	12/24 Default	935	410.333	524.667
2	C941Y	Fly 14	12/24 Default	899	327	572
2	C941Y	Fly 15	12/24 Default	1005.33	400	605.333
2	C941Y	Fly 16	12/24 Default	878.333	410.333	468
2	C941Y	Fly 17	12/24 Default	385.333	130	255.333
2	C941Y	Fly 18	12/24 Default	1049.67	454.333	595.333
2	C941Y3mMTMG	Fly 1	12/24 Default	1044.33	479.333	565
2	C941Y3mMTMG	Fly 2	12/24 Default	611	199	412
2	C941Y3mMTMG	Fly 3	12/24 Default	713.667	303	410.667
2	C941Y3mMTMG	Fly 4	12/24 Default	766.667	334	432.667
2	C941Y3mMTMG	Fly 5	12/24 Default	983	448.333	534.667
2	C941Y3mMTMG	Fly 6	12/24 Default	995.333	428.667	566.667
2	C941Y3mMTMG	Fly 7	12/24 Default	896.333	394	502.333
2	C941Y3mMTMG	Fly 8	12/24 Default	1038.67	429.333	609.333
2	C941Y3mMTMG	Fly 9	12/24 Default	975.667	421.667	554
2	C941Y3mMTMG	Fly 10	12/24 Default	904.333	391.333	513
2	C941Y3mMTMG	Fly 11	12/24 Default	937.333	425	512.333
2	C941Y3mMTMG	Fly 12	12/24 Default	870.667	360.667	510
2	C941Y3mMTMG	Fly 13	12/24 Default	1002.67	445	557.667
2	C941Y3mMTMG	Fly 14	12/24 Default	821.333	337.333	484
2	C941Y3mMTMG	Fly 15	12/24 Default	837	332.333	504.667
2	C941Y3mMTMG	Fly 16	12/24 Default	1016	503.333	512.667
2	C941Y3mMTMG	Fly 17	12/24 Default	1028.67	430.667	598
2	C941Y3mMTMG	Fly 18	12/24 Default	969.333	402.667	566.667
2	C941Y3mMTMG	Fly 19	12/24 Default	955	444	511
2	C941Y3mMTMG	Fly 20	12/24 Default	860.333	391.667	468.667
2	C941Y3mMTMG	Fly 21	12/24 Default	1201.33	540.667	660.667
2	C941Y3mMTMG	Fly 22	12/24 Default	1133	518.333	614.667
2	C941Y3mMTMG	Fly 23	12/24 Default	767.667	281.667	486
2	C941Y3mMTMG	Fly 24	12/24 Default	963.333	448	515.333
2	WT	Fly 1	12/24 Default	1042.33	469.667	572.667
2	WT	Fly 2	12/24 Default	1043.33	539	504.333
2	WT	Fly 3	12/24 Default	842	369.333	472.667
2	WT	Fly 4	12/24 Default	724.667	293.667	431
2	WT	Fly 5	12/24 Default	901.667	411.333	490.333
2	WT	Fly 6	12/24 Default	935.667	430.667	505
2	WT	Fly 7	12/24 Default	1052.67	500.667	552
2	WT	Fly 8	12/24 Default	905.667	405.667	500
2	WT	Fly 9	12/24 Default	1032.67	459	573.667
2	WT	Fly 10	12/24 Default	921.333	388.333	533
2	WT	Fly 11	12/24 Default	894	373.333	520.667
2	WT	Fly 12	12/24 Default	984	422.667	561.333
2	WT	Fly 13	12/24 Default	916.333	368.333	548
2	WT	Fly 14	12/24 Default	1049.67	444.333	605.333
2	WT	Fly 15	12/24 Default	845	373.667	471.333
2	WT	Fly 16	12/24 Default	1028.33	443.667	584.667
2	WT	Fly 17	12/24 Default	777.333	356	421.333
2	WT	Fly 18	12/24 Default	945	447	498
2	WT	Fly 19	12/24 Default	615	327.667	287.333
2	WT	Fly 20	12/24 Default	795	346.667	448.333
3	WT	Fly 1	12/24 Default	739	343	396
3	WT	Fly 2	12/24 Default	799.333	275	524.333
3	WT	Fly 3	12/24 Default	823.333	283.333	540
3	WT	Fly 4	12/24 Default	1017	434.333	582.667
3	WT	Fly 5	12/24 Default	963.667	403	560.667
3	WT	Fly 6	12/24 Default	1071.67	429	642.667
3	WT	Fly 7	12/24 Default	675.667	204.667	471
3	WT	Fly 8	12/24 Default	869.333	383.667	485.667
3	WT	Fly 9	12/24 Default	1006	442.333	563.667
3	WT	Fly 10	12/24 Default	928.333	395	533.333
3	WT	Fly 11	12/24 Default	820	302.333	517.667
3	WT	Fly 12	12/24 Default	749.333	301	448.333
3	WT	Fly 13	12/24 Default	1094	477	617
3	WT	Fly 14	12/24 Default	878.333	336.333	542
3	WT	Fly 15	12/24 Default	764	241	523
3	WT	Fly 16	12/24 Default	884.333	358.333	526
3	WT	Fly 17	12/24 Default	740	235	505
3	WT	Fly 18	12/24 Default	784	254.333	529.667
3	WT	Fly 19	12/24 Default	759.333	264.333	495
3	WT	Fly 20	12/24 Default	1059.67	455.667	604
3	WT	Fly 21	12/24 Default	799.333	260.667	538.667
3	WT	Fly 22	12/24 Default	1065	403	662
3	WT	Fly 23	12/24 Default	820	303	517
3	WT	Fly 24	12/24 Default	926.333	333	593.333
3	WT	Fly 25	12/24 Default	928	294	634
3	C941Y	Fly 1	12/24 Default	1050.33	441.667	608.667
3	C941Y	Fly 2	12/24 Default	725.667	318	407.667
3	C941Y	Fly 3	12/24 Default	962.667	447.667	515
3	C941Y	Fly 4	12/24 Default	994	412	582
3	C941Y	Fly 5	12/24 Default	840.667	329	511.667
3	C941Y	Fly 6	12/24 Default	788	335.333	452.667
3	C941Y	Fly 7	12/24 Default	1116	470	646
3	C941Y	Fly 8	12/24 Default	1040.67	423	617.667
3	C941Y	Fly 9	12/24 Default	1064.33	506.333	558
3	C941Y	Fly 10	12/24 Default	992.333	416.667	575.667
3	C941Y	Fly 11	12/24 Default	947.667	426	521.667
3	C941Y	Fly 12	12/24 Default	1022.67	453	569.667
3	C941Y	Fly 13	12/24 Default	800.667	320.667	480
3	C941Y	Fly 14	12/24 Default	1068	484.667	583.333
3	C941Y	Fly 15	12/24 Default	931.667	422	509.667
3	C941Y	Fly 16	12/24 Default	668	192.333	475.667
3	C941Y	Fly 17	12/24 Default	1091	466.667	624.333
3	C941Y	Fly 18	12/24 Default	1110.67	489	621.667
3	C941Y	Fly 19	12/24 Default	990	362.667	627.333
3	C941Y	Fly 20	12/24 Default	737	281.667	455.333
3	C941Y3mMTMG	Fly 1	12/24 Default	884.333	355	529.333
3	C941Y3mMTMG	Fly 2	12/24 Default	993.333	461.667	531.667
3	C941Y3mMTMG	Fly 3	12/24 Default	911.333	383.667	527.667
3	C941Y3mMTMG	Fly 4	12/24 Default	906	377.667	528.333
3	C941Y3mMTMG	Fly 5	12/24 Default	774	281	493
3	C941Y3mMTMG	Fly 6	12/24 Default	835.333	279.667	555.667
3	C941Y3mMTMG	Fly 7	12/24 Default	950.667	408.333	542.333
3	C941Y3mMTMG	Fly 8	12/24 Default	973	361	612
3	C941Y3mMTMG	Fly 9	12/24 Default	882.333	361.667	520.667
3	C941Y3mMTMG	Fly 10	12/24 Default	957	372	585
3	C941Y3mMTMG	Fly 11	12/24 Default	842.667	289.333	553.333
3	C941Y3mMTMG	Fly 12	12/24 Default	919.333	350.667	568.667
3	C941Y3mMTMG	Fly 13	12/24 Default	1066	447.667	618.333
3	C941Y3mMTMG	Fly 14	12/24 Default	863.667	367	496.667
3	C941Y3mMTMG	Fly 15	12/24 Default	909.333	367	542.333
3	C941Y3mMTMG	Fly 16	12/24 Default	1000.67	409.333	591.333
3	C941Y3mMTMG	Fly 17	12/24 Default	874	328	546
3	C941Y3mMTMG	Fly 18	12/24 Default	1097.67	434.333	663.333
3	C941Y3mMTMG	Fly 19	12/24 Default	1119.33	496.333	623
3	C941Y3mMTMG	Fly 20	12/24 Default	991	444	547
3	C941Y3mMTMG	Fly 21	12/24 Default	864	363	501
3	C941Y3mMTMG	Fly 22	12/24 Default	996.667	351.333	645.333
3	C941Y3mMTMG	Fly 23	12/24 Default	1096	449.333	646.667

## Sheet: Sleep bout number
Repeat	Group	FlyNumber	BinLength	24h	1st12h	2nd12h
1	WT	Fly 1	12/24 Default	23.6667	17	6.6667
1	WT	Fly 2	12/24 Default	44.6667	24.3333	20.3333
1	WT	Fly 3	12/24 Default	28.3333	12	16.3333
1	WT	Fly 4	12/24 Default	21	10	11
1	WT	Fly 5	12/24 Default	18.6667	11.3333	7.3333
1	WT	Fly 6	12/24 Default	22.6667	16	6.6667
1	WT	Fly 7	12/24 Default	33	17	16
1	WT	Fly 8	12/24 Default	26	14	12
1	WT	Fly 9	12/24 Default	27	16	11
1	WT	Fly 10	12/24 Default	27	13.6667	13.3333
1	WT	Fly 11	12/24 Default	22.6667	9	13.6667
1	WT	Fly 12	12/24 Default	27.6667	11.6667	16
1	WT	Fly 13	12/24 Default	28.3333	9.6667	18.6667
1	WT	Fly 14	12/24 Default	21.6667	11.6667	10
1	WT	Fly 15	12/24 Default	26.6667	18.6667	8
1	WT	Fly 16	12/24 Default	29.6667	14	15.6667
1	WT	Fly 17	12/24 Default	31.6667	17	14.6667
1	WT	Fly 18	12/24 Default	24	10	14
1	C941Y	Fly 1	12/24 Default	33.6667	15	18.6667
1	C941Y	Fly 2	12/24 Default	29.6667	18.3333	11.3333
1	C941Y	Fly 3	12/24 Default	56.6667	24.6667	32
1	C941Y	Fly 4	12/24 Default	40.3333	15.3333	25
1	C941Y	Fly 5	12/24 Default	31.3333	19	12.3333
1	C941Y	Fly 6	12/24 Default	39.6667	22	17.6667
1	C941Y	Fly 7	12/24 Default	45.6667	21.6667	24
1	C941Y	Fly 8	12/24 Default	53	26.6667	26.3333
1	C941Y	Fly 9	12/24 Default	30.6667	17.3333	13.3333
1	C941Y	Fly 10	12/24 Default	24	15	9
1	C941Y	Fly 11	12/24 Default	33.6667	15.6667	18
1	C941Y	Fly 12	12/24 Default	29.3333	13.6667	15.6667
1	C941Y	Fly 13	12/24 Default	27.6667	14.3333	13.3333
1	C941Y	Fly 14	12/24 Default	41.3333	18.6667	22.6667
1	C941Y	Fly 15	12/24 Default	36.6667	20.3333	16.3333
1	C941Y	Fly 16	12/24 Default	37	17	20
1	C941Y	Fly 17	12/24 Default	32.6667	15.3333	17.3333
1	C941Y	Fly 18	12/24 Default	33.3333	14	19.3333
1	C941Y	Fly 19	12/24 Default	21.3333	9.3333	12
1	C941Y3mMTMG	Fly 1	12/24 Default	30	13	17
1	C941Y3mMTMG	Fly 2	12/24 Default	34.6667	21	13.6667
1	C941Y3mMTMG	Fly 3	12/24 Default	40	21.6667	18.3333
1	C941Y3mMTMG	Fly 4	12/24 Default	23.3333	16.6667	6.6667
1	C941Y3mMTMG	Fly 5	12/24 Default	22.6667	10.3333	12.3333
1	C941Y3mMTMG	Fly 6	12/24 Default	31.3333	23.6667	7.6667
1	C941Y3mMTMG	Fly 7	12/24 Default	20.6667	13	7.6667
1	C941Y3mMTMG	Fly 8	12/24 Default	31	14.3333	16.6667
1	C941Y3mMTMG	Fly 9	12/24 Default	24	14	10
1	C941Y3mMTMG	Fly 10	12/24 Default	20.3333	9.3333	11
1	C941Y3mMTMG	Fly 11	12/24 Default	41.6667	17	24.6667
1	C941Y3mMTMG	Fly 12	12/24 Default	33.6667	13.3333	20.3333
1	C941Y3mMTMG	Fly 13	12/24 Default	25.3333	14.3333	11
2	C941Y	Fly 1	12/24 Default	42.3333	23	19.3333
2	C941Y	Fly 2	12/24 Default	32	18.3333	13.6667
2	C941Y	Fly 3	12/24 Default	25.3333	14.6667	10.6667
2	C941Y	Fly 4	12/24 Default	27	14.3333	12.6667
2	C941Y	Fly 5	12/24 Default	35.3333	17.6667	17.6667
2	C941Y	Fly 6	12/24 Default	29.3333	20	9.3333
2	C941Y	Fly 7	12/24 Default	23.6667	15	8.6667
2	C941Y	Fly 8	12/24 Default	32	19	13
2	C941Y	Fly 9	12/24 Default	30	18.3333	11.6667
2	C941Y	Fly 10	12/24 Default	30	18.3333	11.6667
2	C941Y	Fly 11	12/24 Default	18	13.6667	4.3333
2	C941Y	Fly 12	12/24 Default	27	13.6667	13.3333
2	C941Y	Fly 13	12/24 Default	26.3333	14	12.3333
2	C941Y	Fly 14	12/24 Default	25	15	10
2	C941Y	Fly 15	12/24 Default	33	21.3333	11.6667
2	C941Y	Fly 16	12/24 Default	26	11.3333	14.6667
2	C941Y	Fly 17	12/24 Default	21	8.3333	12.6667
2	C941Y	Fly 18	12/24 Default	26	16.3333	9.6667
2	C941Y3mMTMG	Fly 1	12/24 Default	31.3333	18.3333	13
2	C941Y3mMTMG	Fly 2	12/24 Default	36.6667	18	18.6667
2	C941Y3mMTMG	Fly 3	12/24 Default	27	11.3333	15.6667
2	C941Y3mMTMG	Fly 4	12/24 Default	40.3333	16.6667	23.6667
2	C941Y3mMTMG	Fly 5	12/24 Default	26	14	12
2	C941Y3mMTMG	Fly 6	12/24 Default	30	16.6667	13.3333
2	C941Y3mMTMG	Fly 7	12/24 Default	19.6667	12	7.6667
2	C941Y3mMTMG	Fly 8	12/24 Default	18.6667	12	6.6667
2	C941Y3mMTMG	Fly 9	12/24 Default	26.6667	13.6667	13
2	C941Y3mMTMG	Fly 10	12/24 Default	40	20.3333	19.6667
2	C941Y3mMTMG	Fly 11	12/24 Default	26.6667	13.3333	13.3333
2	C941Y3mMTMG	Fly 12	12/24 Default	17.3333	8.6667	8.6667
2	C941Y3mMTMG	Fly 13	12/24 Default	27.3333	14	13.3333
2	C941Y3mMTMG	Fly 14	12/24 Default	23.6667	10	13.6667
2	C941Y3mMTMG	Fly 15	12/24 Default	25.6667	11.3333	14.3333
2	C941Y3mMTMG	Fly 16	12/24 Default	31	17.3333	13.6667
2	C941Y3mMTMG	Fly 17	12/24 Default	33	20.6667	12.3333
2	C941Y3mMTMG	Fly 18	12/24 Default	26.3333	15.6667	10.6667
2	C941Y3mMTMG	Fly 19	12/24 Default	32.3333	16.6667	15.6667
2	C941Y3mMTMG	Fly 20	12/24 Default	21	10.6667	10.3333
2	C941Y3mMTMG	Fly 21	12/24 Default	17.3333	9	8.3333
2	C941Y3mMTMG	Fly 22	12/24 Default	30.3333	17	13.3333
2	C941Y3mMTMG	Fly 23	12/24 Default	28	13.3333	14.6667
2	C941Y3mMTMG	Fly 24	12/24 Default	20.6667	13.3333	7.3333
2	WT	Fly 1	12/24 Default	17.6667	11	6.6667
2	WT	Fly 2	12/24 Default	19.3333	11.3333	8
2	WT	Fly 3	12/24 Default	26	13.6667	12.3333
2	WT	Fly 4	12/24 Default	23.6667	14	9.6667
2	WT	Fly 5	12/24 Default	16.3333	10.6667	5.6667
2	WT	Fly 6	12/24 Default	24	12.6667	11.3333
2	WT	Fly 7	12/24 Default	25.3333	13.3333	12
2	WT	Fly 8	12/24 Default	29.6667	14.3333	15.3333
2	WT	Fly 9	12/24 Default	33.3333	20.3333	13
2	WT	Fly 10	12/24 Default	14.3333	10	4.3333
2	WT	Fly 11	12/24 Default	23.3333	10.6667	12.6667
2	WT	Fly 12	12/24 Default	16	8	8
2	WT	Fly 13	12/24 Default	31.6667	21	10.6667
2	WT	Fly 14	12/24 Default	28.6667	17.6667	11
2	WT	Fly 15	12/24 Default	31	19.6667	11.3333
2	WT	Fly 16	12/24 Default	28.3333	19.6667	8.6667
2	WT	Fly 17	12/24 Default	26	15.6667	10.3333
2	WT	Fly 18	12/24 Default	19	12.3333	6.6667
2	WT	Fly 19	12/24 Default	26	13.6667	12.3333
2	WT	Fly 20	12/24 Default	19.3333	11.3333	8
3	WT	Fly 1	12/24 Default	31.6667	15.6667	16
3	WT	Fly 2	12/24 Default	24.3333	11	13.3333
3	WT	Fly 3	12/24 Default	25.3333	10.6667	14.6667
3	WT	Fly 4	12/24 Default	29.3333	16.6667	12.6667
3	WT	Fly 5	12/24 Default	23.3333	10	13.3333
3	WT	Fly 6	12/24 Default	25.6667	16	9.6667
3	WT	Fly 7	12/24 Default	39.3333	17.6667	21.6667
3	WT	Fly 8	12/24 Default	20.3333	15.6667	4.6667
3	WT	Fly 9	12/24 Default	19.3333	13	6.3333
3	WT	Fly 10	12/24 Default	34.3333	18.3333	16
3	WT	Fly 11	12/24 Default	17.3333	10.3333	7
3	WT	Fly 12	12/24 Default	45	21.3333	23.6667
3	WT	Fly 13	12/24 Default	23.6667	14	9.6667
3	WT	Fly 14	12/24 Default	26.6667	16.6667	10
3	WT	Fly 15	12/24 Default	33	13.6667	19.3333
3	WT	Fly 16	12/24 Default	29.6667	17	12.6667
3	WT	Fly 17	12/24 Default	21	9.6667	11.3333
3	WT	Fly 18	12/24 Default	23	18.3333	4.6667
3	WT	Fly 19	12/24 Default	20.6667	13	7.6667
3	WT	Fly 20	12/24 Default	20.6667	10.6667	10
3	WT	Fly 21	12/24 Default	31	12.6667	18.3333
3	WT	Fly 22	12/24 Default	21	17.3333	3.6667
3	WT	Fly 23	12/24 Default	27.6667	13	14.6667
3	WT	Fly 24	12/24 Default	21.6667	14	7.6667
3	WT	Fly 25	12/24 Default	20.3333	13	7.3333
3	C941Y	Fly 1	12/24 Default	32.3333	20.6667	11.6667
3	C941Y	Fly 2	12/24 Default	32.3333	17.6667	14.6667
3	C941Y	Fly 3	12/24 Default	37.6667	17	20.6667
3	C941Y	Fly 4	12/24 Default	27.3333	15.6667	11.6667
3	C941Y	Fly 5	12/24 Default	36.6667	19	17.6667
3	C941Y	Fly 6	12/24 Default	26	13.6667	12.3333
3	C941Y	Fly 7	12/24 Default	19	12.3333	6.6667
3	C941Y	Fly 8	12/24 Default	28	20.6667	7.3333
3	C941Y	Fly 9	12/24 Default	37	19.6667	17.3333
3	C941Y	Fly 10	12/24 Default	31.3333	20.3333	11
3	C941Y	Fly 11	12/24 Default	38	20.3333	17.6667
3	C941Y	Fly 12	12/24 Default	48.6667	28.3333	20.3333
3	C941Y	Fly 13	12/24 Default	31	18.6667	12.3333
3	C941Y	Fly 14	12/24 Default	28.3333	16	12.3333
3	C941Y	Fly 15	12/24 Default	31.6667	15.3333	16.3333
3	C941Y	Fly 16	12/24 Default	37.6667	18.3333	19.3333
3	C941Y	Fly 17	12/24 Default	32.6667	17	15.6667
3	C941Y	Fly 18	12/24 Default	28.6667	18	10.6667
3	C941Y	Fly 19	12/24 Default	28	18.6667	9.3333
3	C941Y	Fly 20	12/24 Default	27	15.3333	11.6667
3	C941Y3mMTMG	Fly 1	12/24 Default	29.6667	14.6667	15
3	C941Y3mMTMG	Fly 2	12/24 Default	33.6667	17.6667	16
3	C941Y3mMTMG	Fly 3	12/24 Default	36	16	20
3	C941Y3mMTMG	Fly 4	12/24 Default	28.3333	15	13.3333
3	C941Y3mMTMG	Fly 5	12/24 Default	39	21	18
3	C941Y3mMTMG	Fly 6	12/24 Default	37.3333	21.3333	16
3	C941Y3mMTMG	Fly 7	12/24 Default	31.6667	21	10.6667
3	C941Y3mMTMG	Fly 8	12/24 Default	29.3333	18.3333	11
3	C941Y3mMTMG	Fly 9	12/24 Default	31.6667	17	14.6667
3	C941Y3mMTMG	Fly 10	12/24 Default	16.3333	10.3333	6
3	C941Y3mMTMG	Fly 11	12/24 Default	28.3333	17.3333	11
3	C941Y3mMTMG	Fly 12	12/24 Default	34.6667	22	12.6667
3	C941Y3mMTMG	Fly 13	12/24 Default	28	18	10
3	C941Y3mMTMG	Fly 14	12/24 Default	20	8.3333	11.6667
3	C941Y3mMTMG	Fly 15	12/24 Default	31	14	17
3	C941Y3mMTMG	Fly 16	12/24 Default	25.3333	20.3333	5
3	C941Y3mMTMG	Fly 17	12/24 Default	18.3333	12.3333	6
3	C941Y3mMTMG	Fly 18	12/24 Default	23.3333	17.3333	6
3	C941Y3mMTMG	Fly 19	12/24 Default	34.3333	24.6667	9.6667
3	C941Y3mMTMG	Fly 20	12/24 Default	28.6667	17.3333	11.3333
3	C941Y3mMTMG	Fly 21	12/24 Default	39.6667	21.3333	18.3333
3	C941Y3mMTMG	Fly 22	12/24 Default	34.3333	20.6667	13.6667
3	C941Y3mMTMG	Fly 23	12/24 Default	19	12.3333	6.6667
