# Supplementary material for: Rescuable sleep and synaptogenesis phenotypes in a Drosophila model of O-GlcNAc transferase intellectual disability
Source: eLife. 2024 Nov 13;13:e90376. doi: 10.7554/eLife.90376 (PMC11623933; doi:10.7554/eLife.90376)
Supplement: Figure 7—source data 2. [file elife-90376-fig7-data2.xlsx]

## Sheet: TotalSleep
Repeat	Group	FlyNumber	BinLength	24h	1st12h	2nd12h
1	elav>sxcRNAi	Fly 1	12/24 Default	823.333	232.333	591
1	elav>sxcRNAi	Fly 2	12/24 Default	269.667	69	200.667
1	elav>sxcRNAi	Fly 3	12/24 Default	476.333	192	284.333
1	elav>sxcRNAi	Fly 4	12/24 Default	422.667	93	329.667
1	elav>sxcRNAi	Fly 5	12/24 Default	344	122.667	221.333
1	elav>sxcRNAi	Fly 6	12/24 Default	534.667	177.333	357.333
1	elav>sxcRNAi	Fly 7	12/24 Default	456.333	24.6667	431.667
1	elav>sxcRNAi	Fly 8	12/24 Default	963.667	328.667	635
1	elav>sxcRNAi	Fly 9	12/24 Default	81	0	81
1	elav>sxcRNAi	Fly 10	12/24 Default	703	225	478
1	elav>sxcRNAi	Fly 11	12/24 Default	689.667	156.667	533
1	elav>sxcRNAi	Fly 12	12/24 Default	435.667	49.6667	386
1	elav>sxcRNAi	Fly 13	12/24 Default	186	12.3333	173.667
1	elav>sxcRNAi	Fly 14	12/24 Default	547	170.667	376.333
1	elav>sxcRNAi	Fly 15	12/24 Default	282.667	24	258.667
1	elav>sxcRNAi	Fly 16	12/24 Default	476.333	125.667	350.667
1	repo>sxcRNAi	Fly 1	12/24 Default	600	327.667	272.333
1	repo>sxcRNAi	Fly 2	12/24 Default	691	303	388
1	repo>sxcRNAi	Fly 3	12/24 Default	229.667	45	184.667
1	repo>sxcRNAi	Fly 4	12/24 Default	772	350	422
1	repo>sxcRNAi	Fly 5	12/24 Default	209	121.333	87.6667
1	repo>sxcRNAi	Fly 6	12/24 Default	623	280.667	342.333
1	repo>sxcRNAi	Fly 7	12/24 Default	739	318	421
1	repo>sxcRNAi	Fly 8	12/24 Default	824.333	324	500.333
1	repo>sxcRNAi	Fly 9	12/24 Default	841.667	292.667	549
1	repo>sxcRNAi	Fly 10	12/24 Default	597.333	173	424.333
1	repo>sxcRNAi	Fly 11	12/24 Default	623.333	271.667	351.667
1	repo>sxcRNAi	Fly 12	12/24 Default	567.667	120.333	447.333
1	repo>sxcRNAi	Fly 13	12/24 Default	1272	632.333	639.667
1	repo>sxcRNAi	Fly 14	12/24 Default	682	319.333	362.667
1	repo>sxcRNAi	Fly 15	12/24 Default	828	383.333	444.667
1	repo>sxcRNAi	Fly 16	12/24 Default	386	159.333	226.667
1	repo>sxcRNAi	Fly 17	12/24 Default	720	260.333	459.667
1	repo>sxcRNAi	Fly 18	12/24 Default	1081.33	515	566.333
1	repo>sxcRNAi	Fly 19	12/24 Default	834.667	360.667	474
1	repo>sxcRNAi	Fly 20	12/24 Default	649.667	303.333	346.333
1	repo>sxcRNAi	Fly 21	12/24 Default	663.667	236	427.667
1	repo>sxcRNAi	Fly 22	12/24 Default	392.667	154	238.667
1	repo>sxcRNAi	Fly 23	12/24 Default	819.333	364.667	454.667
1	repo>sxcRNAi	Fly 24	12/24 Default	929.667	380	549.667
1	repo>sxcRNAi	Fly 25	12/24 Default	428.333	132	296.333
1	repo>sxcRNAi	Fly 26	12/24 Default	438	269	169
1	repo>sxcRNAi	Fly 27	12/24 Default	718.333	343.667	374.667
1	repo>sxcRNAi	Fly 28	12/24 Default	536.333	247.333	289
1	repo>sxcRNAi	Fly 29	12/24 Default	654	291.333	362.667
1	repo>sxcRNAi	Fly 30	12/24 Default	424.333	179.667	244.667
1	repo>sxcRNAi	Fly 31	12/24 Default	606	243	363
1	elav>+	Fly 1	12/24 Default	321	134.333	186.667
1	elav>+	Fly 2	12/24 Default	236	155.667	80.3333
1	elav>+	Fly 3	12/24 Default	401.333	134	267.333
1	elav>+	Fly 4	12/24 Default	534	123.333	410.667
1	elav>+	Fly 5	12/24 Default	552.667	263	289.667
1	elav>+	Fly 6	12/24 Default	525.333	187.333	338
1	elav>+	Fly 7	12/24 Default	529	214	315
1	elav>+	Fly 8	12/24 Default	517	163.333	353.667
1	elav>+	Fly 9	12/24 Default	510	248	262
1	elav>+	Fly 10	12/24 Default	772	227	545
1	elav>+	Fly 11	12/24 Default	333	99	234
1	elav>+	Fly 12	12/24 Default	521.333	150.667	370.667
1	elav>+	Fly 13	12/24 Default	732	416.667	315.333
1	elav>+	Fly 14	12/24 Default	765.333	287.333	478
1	elav>+	Fly 15	12/24 Default	223.333	109.333	114
1	elav>+	Fly 16	12/24 Default	560.333	169.333	391
1	elav>+	Fly 17	12/24 Default	396	95.3333	300.667
1	elav>+	Fly 18	12/24 Default	641.667	180.333	461.333
1	elav>+	Fly 19	12/24 Default	283	104	179
1	elav>+	Fly 20	12/24 Default	293	173.333	119.667
1	elav>+	Fly 21	12/24 Default	1002	435	567
1	elav>+	Fly 22	12/24 Default	392.333	36.6667	355.667
1	elav>+	Fly 23	12/24 Default	154	23.3333	130.667
1	elav>+	Fly 24	12/24 Default	660	225.667	434.333
1	elav>+	Fly 25	12/24 Default	492.333	213	279.333
1	elav>+	Fly 26	12/24 Default	314.333	40	274.333
1	elav>+	Fly 27	12/24 Default	273	55.3333	217.667
1	elav>+	Fly 28	12/24 Default	469.333	107.667	361.667
1	elav>+	Fly 29	12/24 Default	516	211.667	304.333
1	ctrl_sxcRNAi	Fly 1	12/24 Default	895.333	332.333	563
1	ctrl_sxcRNAi	Fly 2	12/24 Default	982	393	589
1	ctrl_sxcRNAi	Fly 3	12/24 Default	960.667	376.667	584
1	ctrl_sxcRNAi	Fly 4	12/24 Default	946.333	385.333	561
1	ctrl_sxcRNAi	Fly 5	12/24 Default	890	346.667	543.333
1	ctrl_sxcRNAi	Fly 6	12/24 Default	1056.33	448.667	607.667
1	ctrl_sxcRNAi	Fly 7	12/24 Default	841.667	382.333	459.333
1	ctrl_sxcRNAi	Fly 8	12/24 Default	990	451.333	538.667
1	ctrl_sxcRNAi	Fly 9	12/24 Default	980.333	398.667	581.667
1	ctrl_sxcRNAi	Fly 10	12/24 Default	832.333	277.333	555
1	ctrl_sxcRNAi	Fly 11	12/24 Default	900	407	493
1	ctrl_sxcRNAi	Fly 12	12/24 Default	963	399.333	563.667
1	ctrl_sxcRNAi	Fly 13	12/24 Default	1002.33	417.333	585
1	ctrl_sxcRNAi	Fly 14	12/24 Default	997	435.667	561.333
1	ctrl_sxcRNAi	Fly 15	12/24 Default	1021.67	406.667	615
1	ctrl_sxcRNAi	Fly 16	12/24 Default	877.333	325.333	552
1	ctrl_sxcRNAi	Fly 17	12/24 Default	981	408.333	572.667
1	ctrl_sxcRNAi	Fly 18	12/24 Default	861.667	331.667	530
1	ctrl_sxcRNAi	Fly 19	12/24 Default	657	252.333	404.667
1	ctrl_sxcRNAi	Fly 20	12/24 Default	908.333	381.667	526.667
1	ctrl_sxcRNAi	Fly 21	12/24 Default	1027.67	444	583.667
1	ctrl_sxcRNAi	Fly 22	12/24 Default	881	390	491
1	ctrl_sxcRNAi	Fly 23	12/24 Default	751.333	201	550.333
1	ctrl_sxcRNAi	Fly 24	12/24 Default	922	379.333	542.667
1	ctrl_sxcRNAi	Fly 25	12/24 Default	846.333	300.333	546
1	ctrl_sxcRNAi	Fly 26	12/24 Default	694	312	382
1	ctrl_sxcRNAi	Fly 27	12/24 Default	976.333	382	594.333
1	ctrl_sxcRNAi	Fly 28	12/24 Default	895.333	348.333	547
1	ctrl_sxcRNAi	Fly 29	12/24 Default	872	341.667	530.333
1	ctrl_sxcRNAi	Fly 30	12/24 Default	1003	412.667	590.333
1	ctrl_sxcRNAi	Fly 31	12/24 Default	684.333	229.333	455
1	ctrl_sxcRNAi	Fly 32	12/24 Default	896.333	342	554.333
2	repo>+	Fly 1	12/24 Default	684.333	291.667	392.667
2	repo>+	Fly 2	12/24 Default	758.333	375	383.333
2	repo>+	Fly 3	12/24 Default	817.333	434.667	382.667
2	repo>+	Fly 4	12/24 Default	1049.33	419.667	629.667
2	repo>+	Fly 5	12/24 Default	795.667	454	341.667
2	repo>+	Fly 6	12/24 Default	802.667	411	391.667
2	repo>+	Fly 7	12/24 Default	979.667	407.667	572
2	repo>+	Fly 8	12/24 Default	985.333	438.667	546.667
2	repo>+	Fly 9	12/24 Default	853.333	441.333	412
2	repo>+	Fly 10	12/24 Default	689.667	343.667	346
2	repo>+	Fly 11	12/24 Default	934	473	461
2	repo>+	Fly 12	12/24 Default	804	406.333	397.667
2	repo>+	Fly 13	12/24 Default	833.333	432.667	400.667
2	repo>+	Fly 14	12/24 Default	751.333	378.333	373
2	repo>+	Fly 15	12/24 Default	1006.33	448	558.333
2	repo>+	Fly 16	12/24 Default	925	442.667	482.333
2	repo>+	Fly 17	12/24 Default	746	381.333	364.667
2	repo>+	Fly 18	12/24 Default	721	328	393
2	repo>+	Fly 19	12/24 Default	813	398.667	414.333
2	repo>+	Fly 20	12/24 Default	894.333	439.333	455
2	repo>+	Fly 21	12/24 Default	758.667	350.667	408
2	repo>+	Fly 22	12/24 Default	937.333	468.333	469
2	repo>+	Fly 23	12/24 Default	738	350	388
2	repo>+	Fly 24	12/24 Default	700.667	266.333	434.333
2	repo>+	Fly 25	12/24 Default	652.667	342	310.667
2	repo>+	Fly 26	12/24 Default	830.333	456.667	373.667
2	repo>+	Fly 27	12/24 Default	796.333	367.333	429
2	repo>+	Fly 28	12/24 Default	929	580.667	348.333
2	repo>+	Fly 29	12/24 Default	770.333	346.333	424
2	repo>+	Fly 30	12/24 Default	740.667	419.667	321
2	repo>sxcRNAi	Fly 1	12/24 Default	827	326	501
2	repo>sxcRNAi	Fly 2	12/24 Default	870.333	376.667	493.667
2	repo>sxcRNAi	Fly 3	12/24 Default	706	308.667	397.333
2	repo>sxcRNAi	Fly 4	12/24 Default	820	400	420
2	repo>sxcRNAi	Fly 5	12/24 Default	611	256.333	354.667
2	repo>sxcRNAi	Fly 6	12/24 Default	828	348.333	479.667
2	repo>sxcRNAi	Fly 7	12/24 Default	844.333	370	474.333
2	repo>sxcRNAi	Fly 8	12/24 Default	613.667	168.333	445.333
2	repo>sxcRNAi	Fly 9	12/24 Default	863.667	448.667	415
2	repo>sxcRNAi	Fly 10	12/24 Default	432.333	205.333	227
2	repo>sxcRNAi	Fly 11	12/24 Default	596.333	312.667	283.667
2	repo>sxcRNAi	Fly 12	12/24 Default	638.667	249	389.667
2	repo>sxcRNAi	Fly 13	12/24 Default	815.667	417	398.667
2	repo>sxcRNAi	Fly 14	12/24 Default	646.333	294.667	351.667
2	repo>sxcRNAi	Fly 15	12/24 Default	515.667	258	257.667
2	repo>sxcRNAi	Fly 16	12/24 Default	784	362	422
2	repo>sxcRNAi	Fly 17	12/24 Default	829.667	425.667	404
2	repo>sxcRNAi	Fly 18	12/24 Default	706.667	382	324.667
2	repo>sxcRNAi	Fly 19	12/24 Default	669.333	325.667	343.667
2	repo>sxcRNAi	Fly 20	12/24 Default	593.667	257	336.667
2	repo>sxcRNAi	Fly 21	12/24 Default	867	368.667	498.333
2	repo>sxcRNAi	Fly 22	12/24 Default	839.667	364.667	475
2	repo>sxcRNAi	Fly 23	12/24 Default	832.667	364	468.667
2	elav>sxcRNAi	Fly 1	12/24 Default	397.667	20.6667	377
2	elav>sxcRNAi	Fly 2	12/24 Default	338.667	55.3333	283.333
2	elav>sxcRNAi	Fly 3	12/24 Default	1167.67	529.667	638
2	elav>sxcRNAi	Fly 4	12/24 Default	313.667	101.333	212.333
2	elav>sxcRNAi	Fly 5	12/24 Default	312	27.3333	284.667
2	elav>sxcRNAi	Fly 6	12/24 Default	488.333	145.333	343
2	elav>sxcRNAi	Fly 7	12/24 Default	575	176	399
2	elav>sxcRNAi	Fly 8	12/24 Default	603	163.667	439.333
2	elav>sxcRNAi	Fly 9	12/24 Default	490.667	165	325.667
2	elav>sxcRNAi	Fly 10	12/24 Default	274	84.6667	189.333
2	elav>sxcRNAi	Fly 11	12/24 Default	472	97	375
2	elav>sxcRNAi	Fly 12	12/24 Default	66.3333	0	66.3333
2	elav>sxcRNAi	Fly 13	12/24 Default	296	66.6667	229.333
2	elav>sxcRNAi	Fly 14	12/24 Default	761.667	324.333	437.333
2	elav>sxcRNAi	Fly 15	12/24 Default	532	196.667	335.333
2	elav>sxcRNAi	Fly 16	12/24 Default	576.333	210	366.333
2	elav>sxcRNAi	Fly 17	12/24 Default	527	186.333	340.667
2	elav>sxcRNAi	Fly 18	12/24 Default	540.333	166	374.333
2	elav>sxcRNAi	Fly 19	12/24 Default	439.333	130.333	309
2	elav>sxcRNAi	Fly 20	12/24 Default	468.667	172	296.667
2	elav>sxcRNAi	Fly 21	12/24 Default	298	20.3333	277.667
2	elav>sxcRNAi	Fly 22	12/24 Default	640.333	118.667	521.667
2	elav>sxcRNAi	Fly 23	12/24 Default	496	109.333	386.667
2	elav>sxcRNAi	Fly 24	12/24 Default	1386.67	681.667	705
2	elav>sxcRNAi	Fly 25	12/24 Default	465.333	137	328.333
2	elav>sxcRNAi	Fly 26	12/24 Default	448.667	12.3333	436.333
2	ctrl_sxcRNAi	Fly 1	12/24 Default	992.667	453	539.667
2	ctrl_sxcRNAi	Fly 2	12/24 Default	1088.33	453.667	634.667
2	ctrl_sxcRNAi	Fly 3	12/24 Default	990.667	403.333	587.333
2	ctrl_sxcRNAi	Fly 4	12/24 Default	1034.33	442	592.333
2	ctrl_sxcRNAi	Fly 5	12/24 Default	851	389.333	461.667
2	ctrl_sxcRNAi	Fly 6	12/24 Default	628.667	257.333	371.333
2	ctrl_sxcRNAi	Fly 7	12/24 Default	1147	483.667	663.333
2	ctrl_sxcRNAi	Fly 8	12/24 Default	915.667	438.333	477.333
2	ctrl_sxcRNAi	Fly 9	12/24 Default	984.667	406.667	578
2	ctrl_sxcRNAi	Fly 10	12/24 Default	1112.33	441	671.333
2	ctrl_sxcRNAi	Fly 11	12/24 Default	970	411	559
2	ctrl_sxcRNAi	Fly 12	12/24 Default	1024.67	409	615.667
2	ctrl_sxcRNAi	Fly 13	12/24 Default	983.333	417.667	565.667

## Sheet: MeanBoutDuration
Repeat	Group	FlyNumber	BinLength	24h	1st12h	2nd12h
1	elav>sxcRNAi	Fly 1	12/24 Default	30.2083	27.5952	37.9277
1	elav>sxcRNAi	Fly 2	12/24 Default	18.8986	24.7778	17.4338
1	elav>sxcRNAi	Fly 3	12/24 Default	20.3503	17.8864	23.2712
1	elav>sxcRNAi	Fly 4	12/24 Default	16.7904	13.7831	17.5749
1	elav>sxcRNAi	Fly 5	12/24 Default	25.8601	18.5635	36.1476
1	elav>sxcRNAi	Fly 6	12/24 Default	26.3385	41.0222	23.1395
1	elav>sxcRNAi	Fly 7	12/24 Default	24.1079	15.5833	26.2884
1	elav>sxcRNAi	Fly 8	12/24 Default	43.9186	30.135	68.3598
1	elav>sxcRNAi	Fly 9	12/24 Default	19.8889	0	19.8889
1	elav>sxcRNAi	Fly 10	12/24 Default	28.6655	34.681	28.6817
1	elav>sxcRNAi	Fly 11	12/24 Default	30.6845	21.15	37.8182
1	elav>sxcRNAi	Fly 12	12/24 Default	26.4659	8.2778	27.2595
1	elav>sxcRNAi	Fly 13	12/24 Default	10.62	5.1667	11.7044
1	elav>sxcRNAi	Fly 14	12/24 Default	19.0686	13.8953	23.1262
1	elav>sxcRNAi	Fly 15	12/24 Default	10.688	6.3333	11.4802
1	elav>sxcRNAi	Fly 16	12/24 Default	17.5905	15.9241	19.2009
1	repo>sxcRNAi	Fly 1	12/24 Default	33.2754	51.7778	27.4426
1	repo>sxcRNAi	Fly 2	12/24 Default	39.2324	39.5476	39.7603
1	repo>sxcRNAi	Fly 3	12/24 Default	17.7889	7.0833	29.1769
1	repo>sxcRNAi	Fly 4	12/24 Default	40.796	63.4667	36.6503
1	repo>sxcRNAi	Fly 5	12/24 Default	11.3149	10.8444	10.8167
1	repo>sxcRNAi	Fly 6	12/24 Default	41.9279	67.4881	34.3675
1	repo>sxcRNAi	Fly 7	12/24 Default	30.8343	28.8485	33.3904
1	repo>sxcRNAi	Fly 8	12/24 Default	39.038	41.8258	38.4872
1	repo>sxcRNAi	Fly 9	12/24 Default	52.7619	36.85	85.1579
1	repo>sxcRNAi	Fly 10	12/24 Default	22.6533	14.3019	35.5696
1	repo>sxcRNAi	Fly 11	12/24 Default	11.9529	8.7949	17.1984
1	repo>sxcRNAi	Fly 12	12/24 Default	26.7415	10.9358	46.5486
1	repo>sxcRNAi	Fly 13	12/24 Default	90.5042	60.1801	300.2
1	repo>sxcRNAi	Fly 14	12/24 Default	21.4842	19.0356	26.2758
1	repo>sxcRNAi	Fly 15	12/24 Default	31.2742	29.8028	33.0061
1	repo>sxcRNAi	Fly 16	12/24 Default	19.4203	13.8167	32.494
1	repo>sxcRNAi	Fly 17	12/24 Default	25.8028	24.6528	47.0378
1	repo>sxcRNAi	Fly 18	12/24 Default	30.714	30.8725	5.1176
1	repo>sxcRNAi	Fly 19	12/24 Default	55.1929	44.2726	73.4011
1	repo>sxcRNAi	Fly 20	12/24 Default	16.643	14.0425	20.1004
1	repo>sxcRNAi	Fly 21	12/24 Default	20.1865	13.4631	28.0954
1	repo>sxcRNAi	Fly 22	12/24 Default	22.1529	25.9333	21.0532
1	repo>sxcRNAi	Fly 23	12/24 Default	37.6401	33.4897	48.75
1	repo>sxcRNAi	Fly 24	12/24 Default	60.713	103.73	64.6778
1	repo>sxcRNAi	Fly 25	12/24 Default	14.3189	9.9175	17.7079
1	repo>sxcRNAi	Fly 26	12/24 Default	22.0088	30.4336	15.1083
1	repo>sxcRNAi	Fly 27	12/24 Default	37.0539	34.5794	48.1872
1	repo>sxcRNAi	Fly 28	12/24 Default	19.2685	17.9247	20.7838
1	repo>sxcRNAi	Fly 29	12/24 Default	24.7715	25.9651	25.4564
1	repo>sxcRNAi	Fly 30	12/24 Default	18.6755	16.9744	19.3718
1	repo>sxcRNAi	Fly 31	12/24 Default	15.2996	12.0152	20.1292
1	elav>+	Fly 1	12/24 Default	12.817	9.9608	16.0455
1	elav>+	Fly 2	12/24 Default	11.3342	10.2139	15.1032
1	elav>+	Fly 3	12/24 Default	19.2233	12.4788	27.0723
1	elav>+	Fly 4	12/24 Default	20.6459	8.0486	38.1714
1	elav>+	Fly 5	12/24 Default	25.2638	26.3361	25.0654
1	elav>+	Fly 6	12/24 Default	31.0484	17.8222	59.375
1	elav>+	Fly 7	12/24 Default	24.881	24.0063	30.1587
1	elav>+	Fly 8	12/24 Default	31.9576	15.5833	61.7556
1	elav>+	Fly 9	12/24 Default	29.377	29.9387	34.4339
1	elav>+	Fly 10	12/24 Default	51.7361	58.8444	73.6768
1	elav>+	Fly 11	12/24 Default	13.8935	10.7567	16.1804
1	elav>+	Fly 12	12/24 Default	17.8334	10.7433	24.5382
1	elav>+	Fly 13	12/24 Default	29.613	28.3455	30.3359
1	elav>+	Fly 14	12/24 Default	34.3614	25.6092	47.5749
1	elav>+	Fly 15	12/24 Default	12.2625	9.1212	19.8889
1	elav>+	Fly 16	12/24 Default	21.7848	10.3583	41.5685
1	elav>+	Fly 17	12/24 Default	14.4749	7.34	22.7297
1	elav>+	Fly 18	12/24 Default	20.9171	11.2623	34.1833
1	elav>+	Fly 19	12/24 Default	14.404	9.154	21.3175
1	elav>+	Fly 20	12/24 Default	18.1083	18.3258	27.8524
1	elav>+	Fly 21	12/24 Default	30.7869	26.1401	53.0022
1	elav>+	Fly 22	12/24 Default	22.4488	6.4444	30.4524
1	elav>+	Fly 23	12/24 Default	12.1498	7.0556	13.9242
1	elav>+	Fly 24	12/24 Default	21.2492	12.5874	32.8562
1	elav>+	Fly 25	12/24 Default	17.0887	13.4265	21.4884
1	elav>+	Fly 26	12/24 Default	28.675	7.6381	50.9333
1	elav>+	Fly 27	12/24 Default	12.32	8.6587	13.5194
1	elav>+	Fly 28	12/24 Default	20.4703	10.4392	26.6438
1	elav>+	Fly 29	12/24 Default	16.8329	14.2884	22.39
1	ctrl_sxcRNAi	Fly 1	12/24 Default	52.9374	33.6382	81.625
1	ctrl_sxcRNAi	Fly 2	12/24 Default	51.4214	44.6111	62.2778
1	ctrl_sxcRNAi	Fly 3	12/24 Default	60.2328	51.875	69.0783
1	ctrl_sxcRNAi	Fly 4	12/24 Default	50.7134	60.5844	44.2
1	ctrl_sxcRNAi	Fly 5	12/24 Default	59.9418	51.3167	71.8095
1	ctrl_sxcRNAi	Fly 6	12/24 Default	87.2794	83.0979	128.076
1	ctrl_sxcRNAi	Fly 7	12/24 Default	38.5222	50.2976	32.964
1	ctrl_sxcRNAi	Fly 8	12/24 Default	39.4089	33.0183	49.8648
1	ctrl_sxcRNAi	Fly 9	12/24 Default	51.0824	63.702	42.2833
1	ctrl_sxcRNAi	Fly 10	12/24 Default	40.5776	18.5361	114.463
1	ctrl_sxcRNAi	Fly 11	12/24 Default	53.825	43.7778	70.6768
1	ctrl_sxcRNAi	Fly 12	12/24 Default	35.8204	39.2862	35.0531
1	ctrl_sxcRNAi	Fly 13	12/24 Default	75.3961	56.8333	107.933
1	ctrl_sxcRNAi	Fly 14	12/24 Default	51.8148	62.8472	46.7777
1	ctrl_sxcRNAi	Fly 15	12/24 Default	49.9635	32.627	157.537
1	ctrl_sxcRNAi	Fly 16	12/24 Default	34.4929	22.7508	72.7532
1	ctrl_sxcRNAi	Fly 17	12/24 Default	49.6484	34.7032	84.1722
1	ctrl_sxcRNAi	Fly 18	12/24 Default	55.4739	62.8667	77.6357
1	ctrl_sxcRNAi	Fly 19	12/24 Default	28.2681	50.3968	25.2801
1	ctrl_sxcRNAi	Fly 20	12/24 Default	42	37.8912	45.9158
1	ctrl_sxcRNAi	Fly 21	12/24 Default	88.6634	96.8796	39.8056
1	ctrl_sxcRNAi	Fly 22	12/24 Default	67.6611	166.19	82.3175
1	ctrl_sxcRNAi	Fly 23	12/24 Default	31.5287	15.6273	50.7292
1	ctrl_sxcRNAi	Fly 24	12/24 Default	24.9607	21.0778	28.7801
1	ctrl_sxcRNAi	Fly 25	12/24 Default	50.8162	25.2045	121.083
1	ctrl_sxcRNAi	Fly 26	12/24 Default	42.1836	38.5417	49.3429
1	ctrl_sxcRNAi	Fly 27	12/24 Default	46.4881	28.3213	105.748
1	ctrl_sxcRNAi	Fly 28	12/24 Default	62.7269	62.5833	62.8763
1	ctrl_sxcRNAi	Fly 29	12/24 Default	61.8847	62.4	70.5317
1	ctrl_sxcRNAi	Fly 30	12/24 Default	56.4889	40.3744	83.5556
1	ctrl_sxcRNAi	Fly 31	12/24 Default	21.6244	12.7763	33.5706
1	ctrl_sxcRNAi	Fly 32	12/24 Default	33.6706	26.6017	49.4015
2	repo>+	Fly 1	12/24 Default	11.2785	8.3949	15.4535
2	repo>+	Fly 2	12/24 Default	34.2178	31.6558	38.8485
2	repo>+	Fly 3	12/24 Default	39.55	36.2944	50.4866
2	repo>+	Fly 4	12/24 Default	39.07	29.6117	58.0511
2	repo>+	Fly 5	12/24 Default	56.6159	72.3413	44.8519
2	repo>+	Fly 6	12/24 Default	25.7347	21.769	32.722
2	repo>+	Fly 7	12/24 Default	51.6613	26.9041	280.556
2	repo>+	Fly 8	12/24 Default	40.0559	24.0408	86.8413
2	repo>+	Fly 9	12/24 Default	49.233	56.5212	69.3083
2	repo>+	Fly 10	12/24 Default	43.8261	34.6118	63.4286
2	repo>+	Fly 11	12/24 Default	51.9524	59.6746	46.8513
2	repo>+	Fly 12	12/24 Default	56.5899	87.8167	42.3985
2	repo>+	Fly 13	12/24 Default	82.6582	100.883	79.8603
2	repo>+	Fly 14	12/24 Default	43.3197	50.9667	45.9417
2	repo>+	Fly 15	12/24 Default	32.0897	20.9585	89.2141
2	repo>+	Fly 16	12/24 Default	64.6	69.2095	64.4603
2	repo>+	Fly 17	12/24 Default	44.5782	57.1333	37.0278
2	repo>+	Fly 18	12/24 Default	22.398	19.5481	26.3495
2	repo>+	Fly 19	12/24 Default	44.3422	87.4278	30.3189
2	repo>+	Fly 20	12/24 Default	63.3912	121.048	49.7677
2	repo>+	Fly 21	12/24 Default	23.9032	23.4132	24.8432
2	repo>+	Fly 22	12/24 Default	32.0566	31.9282	34.2293
2	repo>+	Fly 23	12/24 Default	40.4211	32.9444	51.7566
2	repo>+	Fly 24	12/24 Default	21.2944	27.6698	19.5774
2	repo>+	Fly 25	12/24 Default	44.4206	47.5972	44.7244
2	repo>+	Fly 26	12/24 Default	47.0991	48.2902	48.537
2	repo>+	Fly 27	12/24 Default	29.6076	39.3704	24.6562
2	repo>+	Fly 28	12/24 Default	63.0278	93.3905	46.8083
2	repo>+	Fly 29	12/24 Default	29.5261	22.5988	42.03
2	repo>+	Fly 30	12/24 Default	45.8341	40.9183	62.15
2	repo>sxcRNAi	Fly 1	12/24 Default	26.1587	22.7306	31.1071
2	repo>sxcRNAi	Fly 2	12/24 Default	32.773	50.7111	26.7083
2	repo>sxcRNAi	Fly 3	12/24 Default	47.1455	93.8333	36.5087
2	repo>sxcRNAi	Fly 4	12/24 Default	18.6703	20.0787	17.6619
2	repo>sxcRNAi	Fly 5	12/24 Default	41.7472	39	46.2417
2	repo>sxcRNAi	Fly 6	12/24 Default	21.5937	15.0502	32.4213
2	repo>sxcRNAi	Fly 7	12/24 Default	34.176	39.2091	31.5441
2	repo>sxcRNAi	Fly 8	12/24 Default	20.8606	20.337	21.2232
2	repo>sxcRNAi	Fly 9	12/24 Default	46.8024	46.9418	56.2735
2	repo>sxcRNAi	Fly 10	12/24 Default	19.6721	35.1611	14.862
2	repo>sxcRNAi	Fly 11	12/24 Default	23.2829	20.4408	33.1742
2	repo>sxcRNAi	Fly 12	12/24 Default	33.5541	42.9682	30.4457
2	repo>sxcRNAi	Fly 13	12/24 Default	33.6646	56.287	24.0471
2	repo>sxcRNAi	Fly 14	12/24 Default	22.2617	26.76	19.5
2	repo>sxcRNAi	Fly 15	12/24 Default	15.9448	14.7961	17.7668
2	repo>sxcRNAi	Fly 16	12/24 Default	33.3754	71.7803	23.9063
2	repo>sxcRNAi	Fly 17	12/24 Default	28.2959	24.097	34.7096
2	repo>sxcRNAi	Fly 18	12/24 Default	34.9698	32.9298	38.4354
2	repo>sxcRNAi	Fly 19	12/24 Default	16.6408	16.5996	17.9769
2	repo>sxcRNAi	Fly 20	12/24 Default	25.6708	27.1432	26.119
2	repo>sxcRNAi	Fly 21	12/24 Default	272.066	292.889	279
2	repo>sxcRNAi	Fly 22	12/24 Default	61.5188	47.8611	80.1556
2	repo>sxcRNAi	Fly 23	12/24 Default	41.497	31.6317	65.4848
2	elav>sxcRNAi	Fly 1	12/24 Default	14.6567	6.8889	15.6232
2	elav>sxcRNAi	Fly 2	12/24 Default	17.8627	10.6349	21.8989
2	elav>sxcRNAi	Fly 3	12/24 Default	35.1857	29.0707	46.4878
2	elav>sxcRNAi	Fly 4	12/24 Default	17.7712	16.8889	18.298
2	elav>sxcRNAi	Fly 5	12/24 Default	14.5555	13.2222	14.6031
2	elav>sxcRNAi	Fly 6	12/24 Default	19.9861	10.9202	35.7205
2	elav>sxcRNAi	Fly 7	12/24 Default	27.037	19.5954	32.5707
2	elav>sxcRNAi	Fly 8	12/24 Default	19.6029	11.1511	27.1836
2	elav>sxcRNAi	Fly 9	12/24 Default	17.0366	16.3952	17.8342
2	elav>sxcRNAi	Fly 10	12/24 Default	17.3	13.8833	20.2103
2	elav>sxcRNAi	Fly 11	12/24 Default	22.6624	15.5185	26.2907
2	elav>sxcRNAi	Fly 12	12/24 Default	11.4148	0	11.4148
2	elav>sxcRNAi	Fly 13	12/24 Default	28.3956	18.8	33.7417
2	elav>sxcRNAi	Fly 14	12/24 Default	27.6929	31.1279	27.9167
2	elav>sxcRNAi	Fly 15	12/24 Default	20.3646	23.3301	19.1999
2	elav>sxcRNAi	Fly 16	12/24 Default	28.62	19.7232	38.2055
2	elav>sxcRNAi	Fly 17	12/24 Default	20.2864	19.5417	21.1159
2	elav>sxcRNAi	Fly 18	12/24 Default	13.7945	11.4166	15.2642
2	elav>sxcRNAi	Fly 19	12/24 Default	23.7865	21.0417	25.1958
2	elav>sxcRNAi	Fly 20	12/24 Default	16.2488	20.7151	14.5389
2	elav>sxcRNAi	Fly 21	12/24 Default	12.5532	5.1778	13.1727
2	elav>sxcRNAi	Fly 22	12/24 Default	30.3194	17.873	38.4981
2	elav>sxcRNAi	Fly 23	12/24 Default	21.0198	10.403	30.0219
2	elav>sxcRNAi	Fly 24	12/24 Default	63.8569	55.2272	91.5
2	elav>sxcRNAi	Fly 25	12/24 Default	20.7224	17.6611	22.5573
2	elav>sxcRNAi	Fly 26	12/24 Default	16.1222	4.7778	16.8137
2	ctrl_sxcRNAi	Fly 1	12/24 Default	36.0135	55.6134	32.95
2	ctrl_sxcRNAi	Fly 2	12/24 Default	70.0905	45.6414	132.952
2	ctrl_sxcRNAi	Fly 3	12/24 Default	39.0132	25.3593	67.2262
2	ctrl_sxcRNAi	Fly 4	12/24 Default	44.2532	36.0537	56.9788
2	ctrl_sxcRNAi	Fly 5	12/24 Default	33.8988	27.2479	43.2341
2	ctrl_sxcRNAi	Fly 6	12/24 Default	28.9183	30.1167	28.9127
2	ctrl_sxcRNAi	Fly 7	12/24 Default	48.2778	48.6222	47.2817
2	ctrl_sxcRNAi	Fly 8	12/24 Default	40.4056	40.2487	41.1329
2	ctrl_sxcRNAi	Fly 9	12/24 Default	26.3216	18.1047	39.6175
2	ctrl_sxcRNAi	Fly 10	12/24 Default	50.3367	34.746	109.064
2	ctrl_sxcRNAi	Fly 11	12/24 Default	28.2857	23.7222	33.0362
2	ctrl_sxcRNAi	Fly 12	12/24 Default	50.9229	28.2421	130.071
2	ctrl_sxcRNAi	Fly 13	12/24 Default	47.2769	47.4771	52.065

## Sheet: BoutNumber
Repeat	Group	FlyNumber	BinLength	24h	1st12h	2nd12h
1	elav>sxcRNAi	Fly 1	12/24 Default	27.6667	11.6667	16
1	elav>sxcRNAi	Fly 2	12/24 Default	11.3333	2.3333	9
1	elav>sxcRNAi	Fly 3	12/24 Default	24.3333	10.6667	13.6667
1	elav>sxcRNAi	Fly 4	12/24 Default	25	5.6667	19.3333
1	elav>sxcRNAi	Fly 5	12/24 Default	13.6667	6.6667	7
1	elav>sxcRNAi	Fly 6	12/24 Default	20.6667	4.6667	16
1	elav>sxcRNAi	Fly 7	12/24 Default	19.6667	2	17.6667
1	elav>sxcRNAi	Fly 8	12/24 Default	22.3333	14.6667	7.6667
1	elav>sxcRNAi	Fly 9	12/24 Default	5	0	5
1	elav>sxcRNAi	Fly 10	12/24 Default	24.6667	8	16.6667
1	elav>sxcRNAi	Fly 11	12/24 Default	22.6667	8.3333	14.3333
1	elav>sxcRNAi	Fly 12	12/24 Default	16.3333	2	14.3333
1	elav>sxcRNAi	Fly 13	12/24 Default	15.6667	2.3333	13.3333
1	elav>sxcRNAi	Fly 14	12/24 Default	28.6667	12.3333	16.3333
1	elav>sxcRNAi	Fly 15	12/24 Default	25.3333	3.6667	21.6667
1	elav>sxcRNAi	Fly 16	12/24 Default	27	8.6667	18.3333
1	repo>sxcRNAi	Fly 1	12/24 Default	18	7.6667	10.3333
1	repo>sxcRNAi	Fly 2	12/24 Default	18	7.6667	10.3333
1	repo>sxcRNAi	Fly 3	12/24 Default	14.3333	5.6667	8.6667
1	repo>sxcRNAi	Fly 4	12/24 Default	19	6.3333	12.6667
1	repo>sxcRNAi	Fly 5	12/24 Default	17.6667	9.6667	8
1	repo>sxcRNAi	Fly 6	12/24 Default	15	4.6667	10.3333
1	repo>sxcRNAi	Fly 7	12/24 Default	24.6667	11.6667	13
1	repo>sxcRNAi	Fly 8	12/24 Default	21.3333	8.3333	13
1	repo>sxcRNAi	Fly 9	12/24 Default	16.6667	8	8.6667
1	repo>sxcRNAi	Fly 10	12/24 Default	27.6667	13.3333	14.3333
1	repo>sxcRNAi	Fly 11	12/24 Default	53.6667	31	22.6667
1	repo>sxcRNAi	Fly 12	12/24 Default	22	11	11
1	repo>sxcRNAi	Fly 13	12/24 Default	14.3333	10.6667	3.6667
1	repo>sxcRNAi	Fly 14	12/24 Default	31.6667	17	14.6667
1	repo>sxcRNAi	Fly 15	12/24 Default	27.3333	13.6667	13.6667
1	repo>sxcRNAi	Fly 16	12/24 Default	22.6667	15.6667	7
1	repo>sxcRNAi	Fly 17	12/24 Default	28.6667	14	14.6667
1	repo>sxcRNAi	Fly 18	12/24 Default	25	19.3333	5.6667
1	repo>sxcRNAi	Fly 19	12/24 Default	15.3333	8.3333	7
1	repo>sxcRNAi	Fly 20	12/24 Default	39.6667	22.3333	17.3333
1	repo>sxcRNAi	Fly 21	12/24 Default	34	18.6667	15.3333
1	repo>sxcRNAi	Fly 22	12/24 Default	18.3333	6	12.3333
1	repo>sxcRNAi	Fly 23	12/24 Default	24.6667	11	13.6667
1	repo>sxcRNAi	Fly 24	12/24 Default	16	5	11
1	repo>sxcRNAi	Fly 25	12/24 Default	30	13.6667	16.3333
1	repo>sxcRNAi	Fly 26	12/24 Default	21.3333	10.3333	11
1	repo>sxcRNAi	Fly 27	12/24 Default	22	12.6667	9.3333
1	repo>sxcRNAi	Fly 28	12/24 Default	29	14	15
1	repo>sxcRNAi	Fly 29	12/24 Default	26.3333	12	14.3333
1	repo>sxcRNAi	Fly 30	12/24 Default	22.6667	10.6667	12
1	repo>sxcRNAi	Fly 31	12/24 Default	41.6667	21.6667	20
1	elav>+	Fly 1	12/24 Default	25.3333	13.6667	11.6667
1	elav>+	Fly 2	12/24 Default	20.6667	15.3333	5.3333
1	elav>+	Fly 3	12/24 Default	21	10.6667	10.3333
1	elav>+	Fly 4	12/24 Default	27.6667	15.3333	12.3333
1	elav>+	Fly 5	12/24 Default	22.6667	11	11.6667
1	elav>+	Fly 6	12/24 Default	17	11	6
1	elav>+	Fly 7	12/24 Default	21.3333	10.3333	11
1	elav>+	Fly 8	12/24 Default	17.6667	11	6.6667
1	elav>+	Fly 9	12/24 Default	20	12.3333	7.6667
1	elav>+	Fly 10	12/24 Default	15.3333	8.6667	6.6667
1	elav>+	Fly 11	12/24 Default	24	9.3333	14.6667
1	elav>+	Fly 12	12/24 Default	29.3333	14	15.3333
1	elav>+	Fly 13	12/24 Default	25.3333	15	10.3333
1	elav>+	Fly 14	12/24 Default	24.6667	13.3333	11.3333
1	elav>+	Fly 15	12/24 Default	18	12	6
1	elav>+	Fly 16	12/24 Default	26.6667	16.6667	10
1	elav>+	Fly 17	12/24 Default	28	13	15
1	elav>+	Fly 18	12/24 Default	31.3333	16.3333	15
1	elav>+	Fly 19	12/24 Default	19.6667	11.3333	8.3333
1	elav>+	Fly 20	12/24 Default	16.3333	10	6.3333
1	elav>+	Fly 21	12/24 Default	32.6667	19.3333	13.3333
1	elav>+	Fly 22	12/24 Default	17.6667	5.6667	12
1	elav>+	Fly 23	12/24 Default	11	3	8
1	elav>+	Fly 24	12/24 Default	33	19	14
1	elav>+	Fly 25	12/24 Default	29.6667	15.6667	14
1	elav>+	Fly 26	12/24 Default	11.3333	5	6.3333
1	elav>+	Fly 27	12/24 Default	23.6667	7	16.6667
1	elav>+	Fly 28	12/24 Default	23.3333	9.3333	14
1	elav>+	Fly 29	12/24 Default	31.3333	15	16.3333
1	ctrl_sxcRNAi	Fly 1	12/24 Default	17.3333	10.3333	7
1	ctrl_sxcRNAi	Fly 2	12/24 Default	22.6667	11.6667	11
1	ctrl_sxcRNAi	Fly 3	12/24 Default	16	7.3333	8.6667
1	ctrl_sxcRNAi	Fly 4	12/24 Default	21.6667	12	9.6667
1	ctrl_sxcRNAi	Fly 5	12/24 Default	15.6667	8	7.6667
1	ctrl_sxcRNAi	Fly 6	12/24 Default	13.6667	7.3333	6.3333
1	ctrl_sxcRNAi	Fly 7	12/24 Default	22	7.6667	14.3333
1	ctrl_sxcRNAi	Fly 8	12/24 Default	25.6667	13.6667	12
1	ctrl_sxcRNAi	Fly 9	12/24 Default	22	9.6667	12.3333
1	ctrl_sxcRNAi	Fly 10	12/24 Default	21	15	6
1	ctrl_sxcRNAi	Fly 11	12/24 Default	17	9.3333	7.6667
1	ctrl_sxcRNAi	Fly 12	12/24 Default	28	10.3333	17.6667
1	ctrl_sxcRNAi	Fly 13	12/24 Default	14	9.3333	4.6667
1	ctrl_sxcRNAi	Fly 14	12/24 Default	19.3333	7	12.3333
1	ctrl_sxcRNAi	Fly 15	12/24 Default	20.6667	16	4.6667
1	ctrl_sxcRNAi	Fly 16	12/24 Default	26	15	11
1	ctrl_sxcRNAi	Fly 17	12/24 Default	20.6667	12	8.6667
1	ctrl_sxcRNAi	Fly 18	12/24 Default	16.3333	7.6667	8.6667
1	ctrl_sxcRNAi	Fly 19	12/24 Default	23.3333	7	16.3333
1	ctrl_sxcRNAi	Fly 20	12/24 Default	23	11	12
1	ctrl_sxcRNAi	Fly 21	12/24 Default	12	8.3333	3.6667
1	ctrl_sxcRNAi	Fly 22	12/24 Default	14.6667	4.6667	10
1	ctrl_sxcRNAi	Fly 23	12/24 Default	26.3333	14.3333	12
1	ctrl_sxcRNAi	Fly 24	12/24 Default	37.6667	18.3333	19.3333
1	ctrl_sxcRNAi	Fly 25	12/24 Default	16.6667	12	4.6667
1	ctrl_sxcRNAi	Fly 26	12/24 Default	16.6667	8.6667	8
1	ctrl_sxcRNAi	Fly 27	12/24 Default	23.6667	16.3333	7.3333
1	ctrl_sxcRNAi	Fly 28	12/24 Default	15.6667	6	9.6667
1	ctrl_sxcRNAi	Fly 29	12/24 Default	14.6667	6.3333	8.3333
1	ctrl_sxcRNAi	Fly 30	12/24 Default	18.3333	10.6667	7.6667
1	ctrl_sxcRNAi	Fly 31	12/24 Default	31.6667	18	13.6667
1	ctrl_sxcRNAi	Fly 32	12/24 Default	26.6667	14.6667	12
2	repo>+	Fly 1	12/24 Default	61	35	26
2	repo>+	Fly 2	12/24 Default	23.3333	12	11.3333
2	repo>+	Fly 3	12/24 Default	21.3333	12.3333	9
2	repo>+	Fly 4	12/24 Default	29.6667	14.3333	15.3333
2	repo>+	Fly 5	12/24 Default	14	6.3333	7.6667
2	repo>+	Fly 6	12/24 Default	31.6667	19.6667	12
2	repo>+	Fly 7	12/24 Default	19	15.3333	3.6667
2	repo>+	Fly 8	12/24 Default	24.6667	18.3333	6.3333
2	repo>+	Fly 9	12/24 Default	17.6667	9	8.6667
2	repo>+	Fly 10	12/24 Default	17.6667	11.6667	6
2	repo>+	Fly 11	12/24 Default	20.6667	9	11.6667
2	repo>+	Fly 12	12/24 Default	14.6667	4.6667	10
2	repo>+	Fly 13	12/24 Default	11.6667	4.3333	7.3333
2	repo>+	Fly 14	12/24 Default	18.6667	8.3333	10.3333
2	repo>+	Fly 15	12/24 Default	34.3333	21.6667	12.6667
2	repo>+	Fly 16	12/24 Default	14.3333	6.6667	7.6667
2	repo>+	Fly 17	12/24 Default	17.6667	7.6667	10
2	repo>+	Fly 18	12/24 Default	32.3333	17	15.3333
2	repo>+	Fly 19	12/24 Default	19.6667	5.3333	14.3333
2	repo>+	Fly 20	12/24 Default	15	4.6667	10.3333
2	repo>+	Fly 21	12/24 Default	32.3333	15	17.3333
2	repo>+	Fly 22	12/24 Default	29.3333	15	14.3333
2	repo>+	Fly 23	12/24 Default	18.3333	10.6667	7.6667
2	repo>+	Fly 24	12/24 Default	34.3333	11.6667	22.6667
2	repo>+	Fly 25	12/24 Default	15.6667	7.3333	8.3333
2	repo>+	Fly 26	12/24 Default	17.6667	9.6667	8
2	repo>+	Fly 27	12/24 Default	27.3333	9.3333	18
2	repo>+	Fly 28	12/24 Default	15.6667	6.3333	9.3333
2	repo>+	Fly 29	12/24 Default	26.3333	15.6667	10.6667
2	repo>+	Fly 30	12/24 Default	18	12.6667	5.3333
2	repo>sxcRNAi	Fly 1	12/24 Default	32.3333	14.3333	18
2	repo>sxcRNAi	Fly 2	12/24 Default	26.6667	8	18.6667
2	repo>sxcRNAi	Fly 3	12/24 Default	17	3.3333	13.6667
2	repo>sxcRNAi	Fly 4	12/24 Default	44	20	24
2	repo>sxcRNAi	Fly 5	12/24 Default	14.6667	6.6667	8
2	repo>sxcRNAi	Fly 6	12/24 Default	38.6667	23.3333	15.3333
2	repo>sxcRNAi	Fly 7	12/24 Default	25	9.6667	15.3333
2	repo>sxcRNAi	Fly 8	12/24 Default	29.3333	8.3333	21
2	repo>sxcRNAi	Fly 9	12/24 Default	19.6667	11.3333	8.3333
2	repo>sxcRNAi	Fly 10	12/24 Default	22	6.3333	15.6667
2	repo>sxcRNAi	Fly 11	12/24 Default	27	18.3333	8.6667
2	repo>sxcRNAi	Fly 12	12/24 Default	20	6.6667	13.3333
2	repo>sxcRNAi	Fly 13	12/24 Default	24.3333	7.6667	16.6667
2	repo>sxcRNAi	Fly 14	12/24 Default	30	11.3333	18.6667
2	repo>sxcRNAi	Fly 15	12/24 Default	33.6667	18.3333	15.3333
2	repo>sxcRNAi	Fly 16	12/24 Default	24	6.3333	17.6667
2	repo>sxcRNAi	Fly 17	12/24 Default	29.6667	18	11.6667
2	repo>sxcRNAi	Fly 18	12/24 Default	21.6667	13	8.6667
2	repo>sxcRNAi	Fly 19	12/24 Default	40.3333	21	19.3333
2	repo>sxcRNAi	Fly 20	12/24 Default	23.3333	10.3333	13
2	repo>sxcRNAi	Fly 21	12/24 Default	5.3333	1.6667	3.6667
2	repo>sxcRNAi	Fly 22	12/24 Default	15.6667	9.3333	6.3333
2	repo>sxcRNAi	Fly 23	12/24 Default	22	11.6667	10.3333
2	elav>sxcRNAi	Fly 1	12/24 Default	27	3	24
2	elav>sxcRNAi	Fly 2	12/24 Default	19.3333	5.6667	13.6667
2	elav>sxcRNAi	Fly 3	12/24 Default	33.3333	21.3333	12
2	elav>sxcRNAi	Fly 4	12/24 Default	17.6667	6	11.6667
2	elav>sxcRNAi	Fly 5	12/24 Default	21.6667	2	19.6667
2	elav>sxcRNAi	Fly 6	12/24 Default	24.6667	13.3333	11.3333
2	elav>sxcRNAi	Fly 7	12/24 Default	21.3333	9	12.3333
2	elav>sxcRNAi	Fly 8	12/24 Default	31	14.6667	16.3333
2	elav>sxcRNAi	Fly 9	12/24 Default	29	10.3333	18.6667
2	elav>sxcRNAi	Fly 10	12/24 Default	17	6.3333	10.6667
2	elav>sxcRNAi	Fly 11	12/24 Default	21	6.3333	14.6667
2	elav>sxcRNAi	Fly 12	12/24 Default	5.6667	0	5.6667
2	elav>sxcRNAi	Fly 13	12/24 Default	11	3.6667	7.3333
2	elav>sxcRNAi	Fly 14	12/24 Default	28	10.6667	17.3333
2	elav>sxcRNAi	Fly 15	12/24 Default	26.6667	9	17.6667
2	elav>sxcRNAi	Fly 16	12/24 Default	22	11.6667	10.3333
2	elav>sxcRNAi	Fly 17	12/24 Default	26.6667	9.6667	17
2	elav>sxcRNAi	Fly 18	12/24 Default	39.6667	15	24.6667
2	elav>sxcRNAi	Fly 19	12/24 Default	18.6667	6.3333	12.3333
2	elav>sxcRNAi	Fly 20	12/24 Default	29.6667	9.3333	20.3333
2	elav>sxcRNAi	Fly 21	12/24 Default	24	2.6667	21.3333
2	elav>sxcRNAi	Fly 22	12/24 Default	22.3333	6.6667	15.6667
2	elav>sxcRNAi	Fly 23	12/24 Default	25	11	14
2	elav>sxcRNAi	Fly 24	12/24 Default	22.6667	18.6667	4
2	elav>sxcRNAi	Fly 25	12/24 Default	22.6667	8	14.6667
2	elav>sxcRNAi	Fly 26	12/24 Default	28	1.6667	26.3333
2	ctrl_sxcRNAi	Fly 1	12/24 Default	28.3333	11.6667	16.6667
2	ctrl_sxcRNAi	Fly 2	12/24 Default	15.6667	10	5.6667
2	ctrl_sxcRNAi	Fly 3	12/24 Default	25.6667	16	9.6667
2	ctrl_sxcRNAi	Fly 4	12/24 Default	24	15.3333	8.6667
2	ctrl_sxcRNAi	Fly 5	12/24 Default	25.3333	14.3333	11
2	ctrl_sxcRNAi	Fly 6	12/24 Default	22	8.6667	13.3333
2	ctrl_sxcRNAi	Fly 7	12/24 Default	25.3333	12.6667	12.6667
2	ctrl_sxcRNAi	Fly 8	12/24 Default	22.6667	11	11.6667
2	ctrl_sxcRNAi	Fly 9	12/24 Default	37.6667	23.3333	14.3333
2	ctrl_sxcRNAi	Fly 10	12/24 Default	23	14.3333	8.6667
2	ctrl_sxcRNAi	Fly 11	12/24 Default	34.3333	17.3333	17
2	ctrl_sxcRNAi	Fly 12	12/24 Default	20.3333	15	5.3333
2	ctrl_sxcRNAi	Fly 13	12/24 Default	21	10	11
