# Supplementary figures and images for: Rescuable sleep and synaptogenesis phenotypes in a Drosophila model of O-GlcNAc transferase intellectual disability
Source: eLife journal article supplement (doi:10.7554/elife.90376), 2024-10-21

A

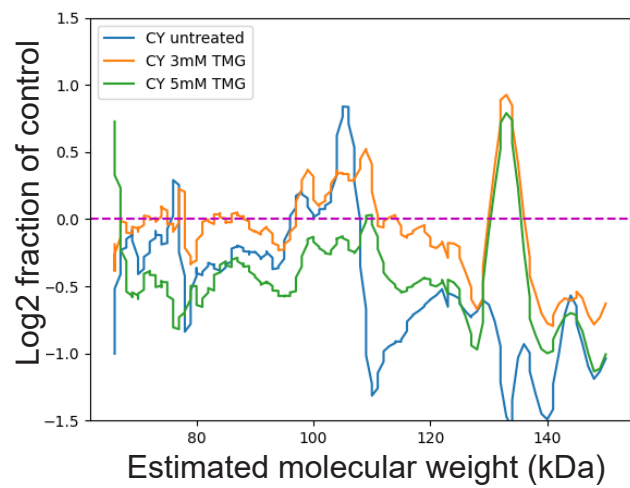

B

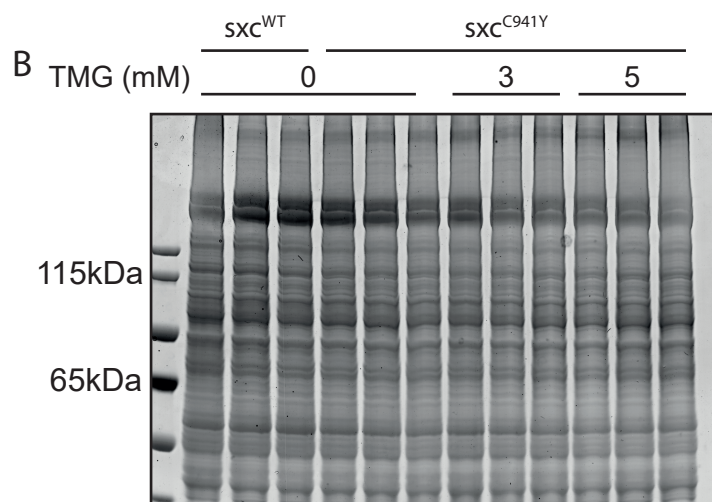

C

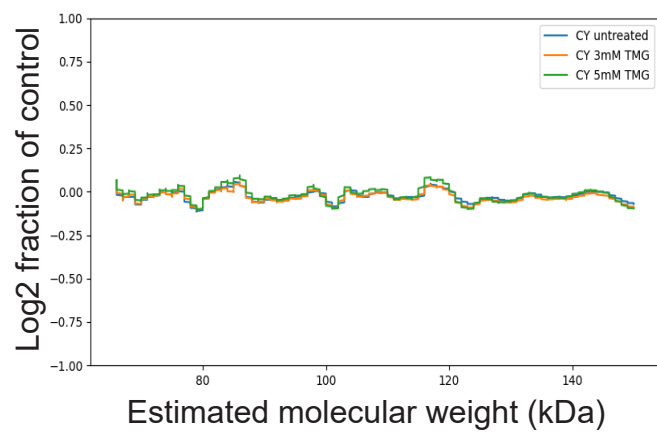

Supplement: supp [file elife-90376-supp-v1.zip]

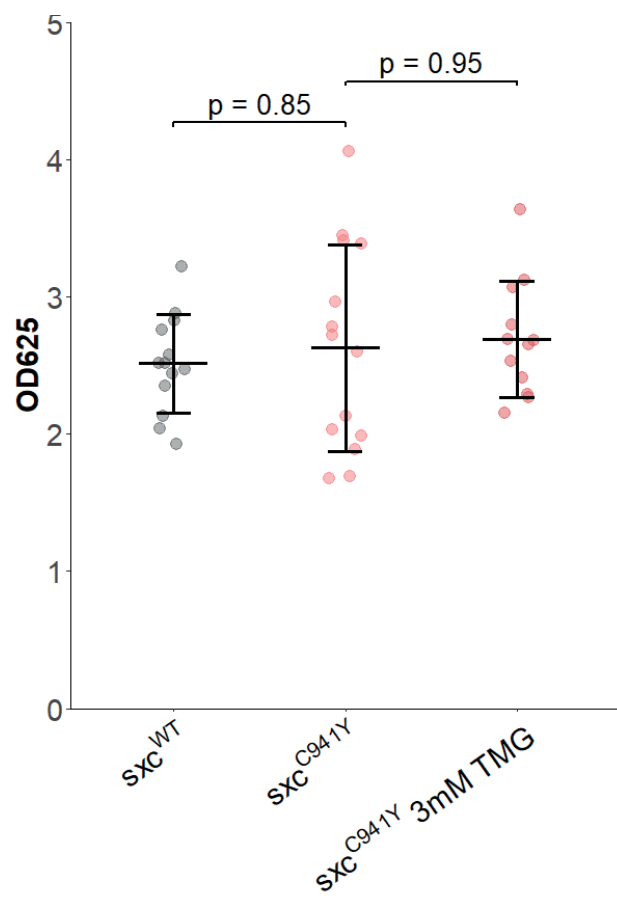

Supplement: supp [file elife-90376-supp-v1.zip]

A

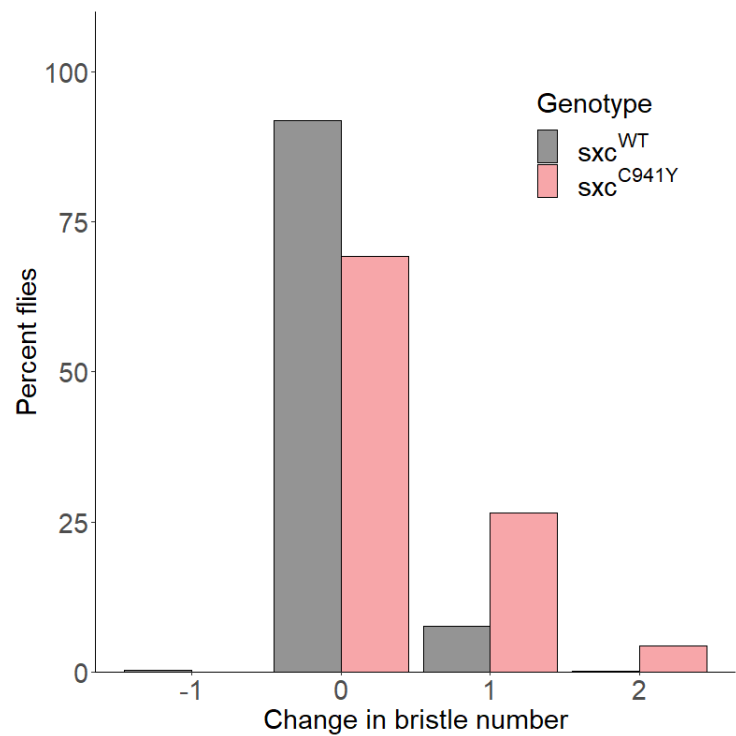

B

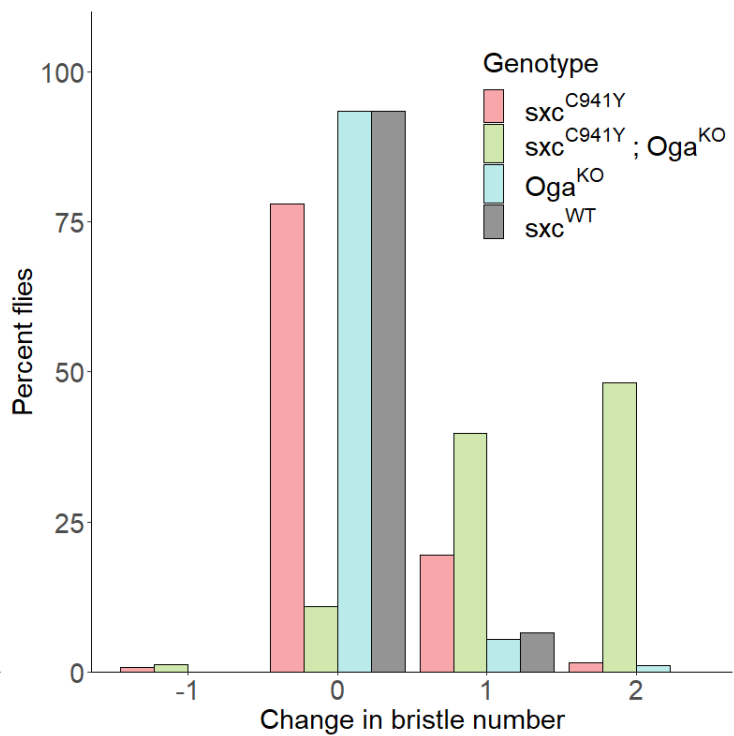

Supplement: supp [file elife-90376-supp-v1.zip]

**B**

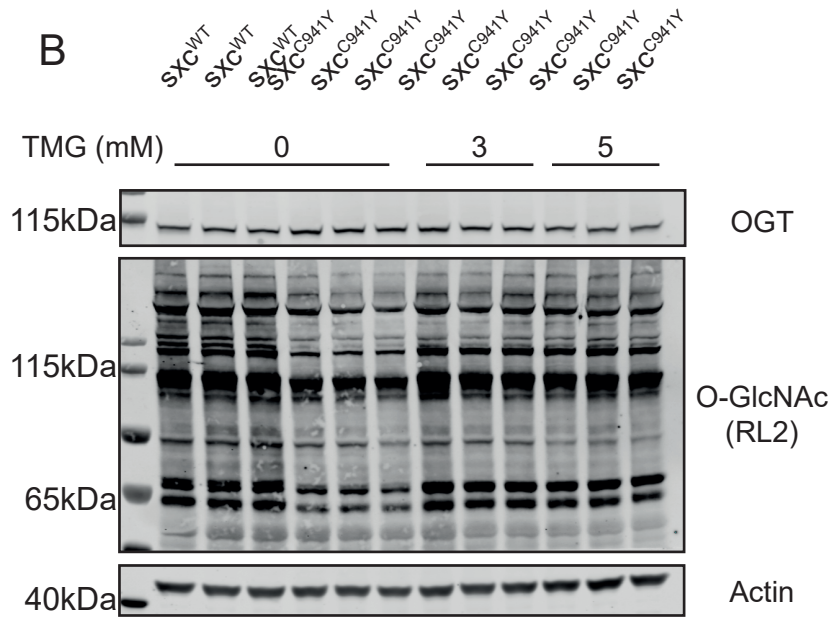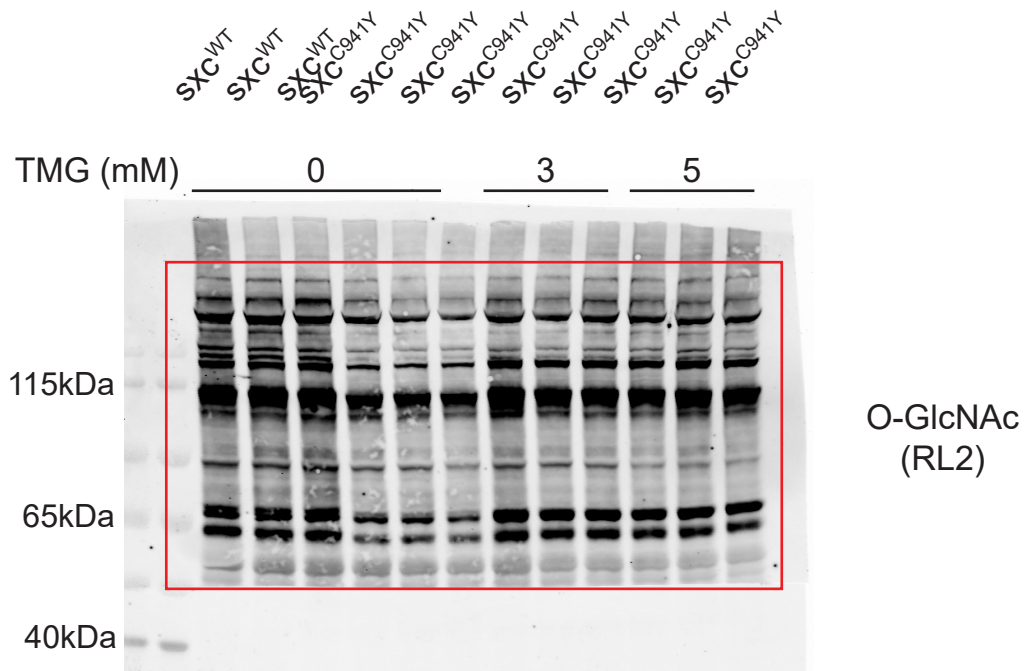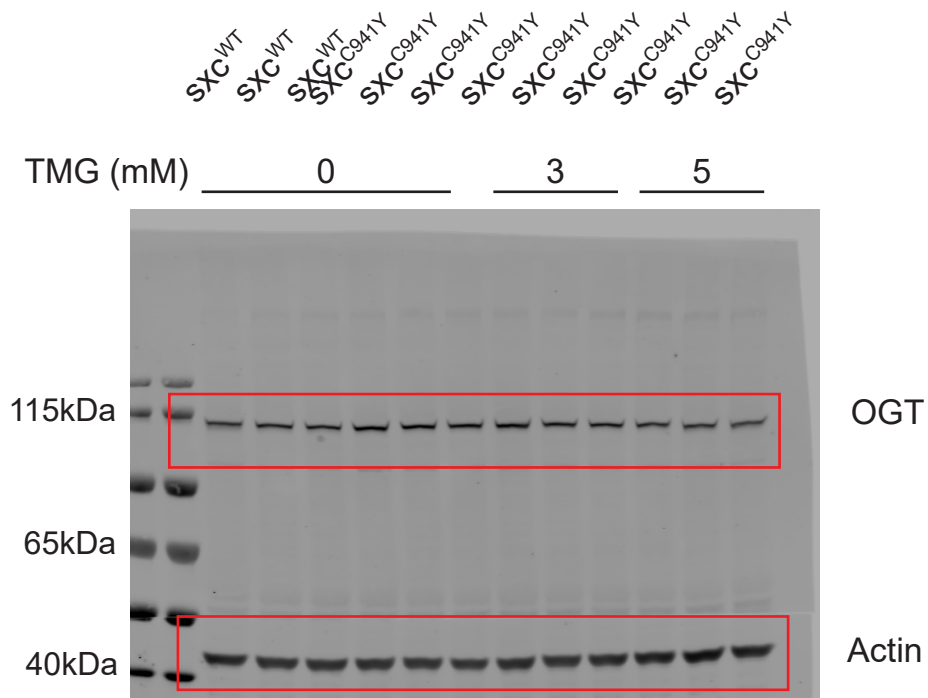

Supplement: supp [file elife-90376-supp-v1.zip]

A

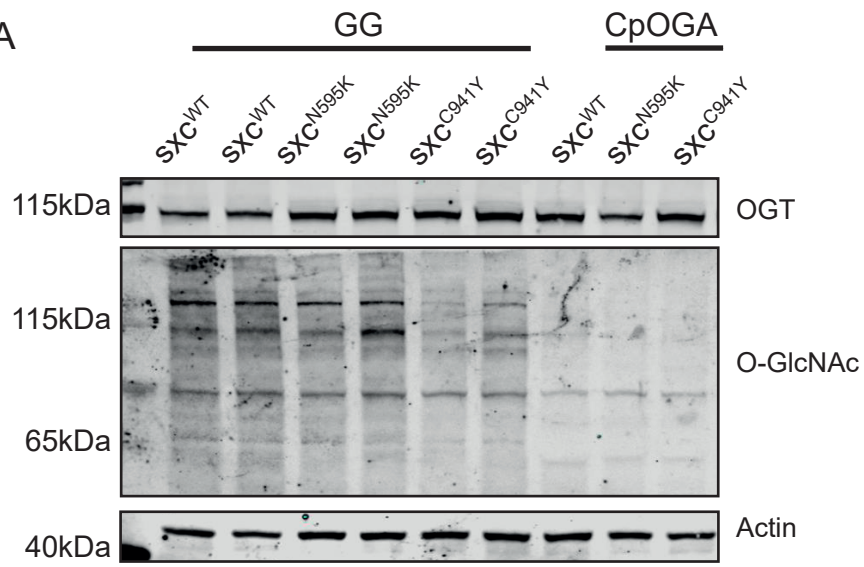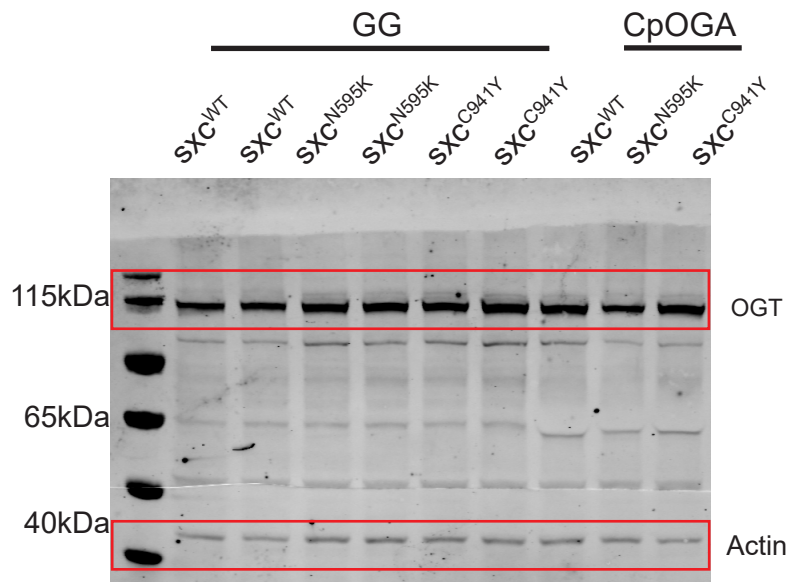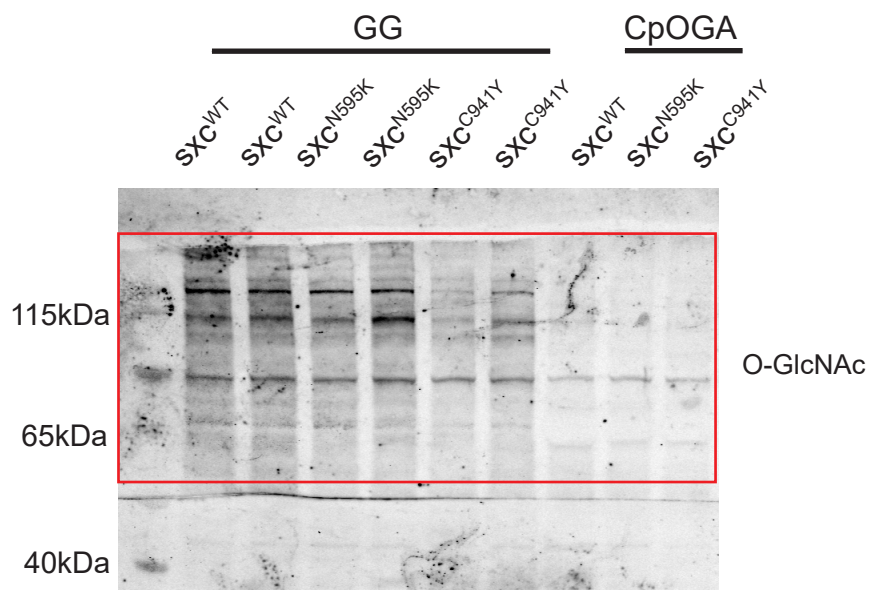

Supplement: supp [file elife-90376-supp-v1.zip]

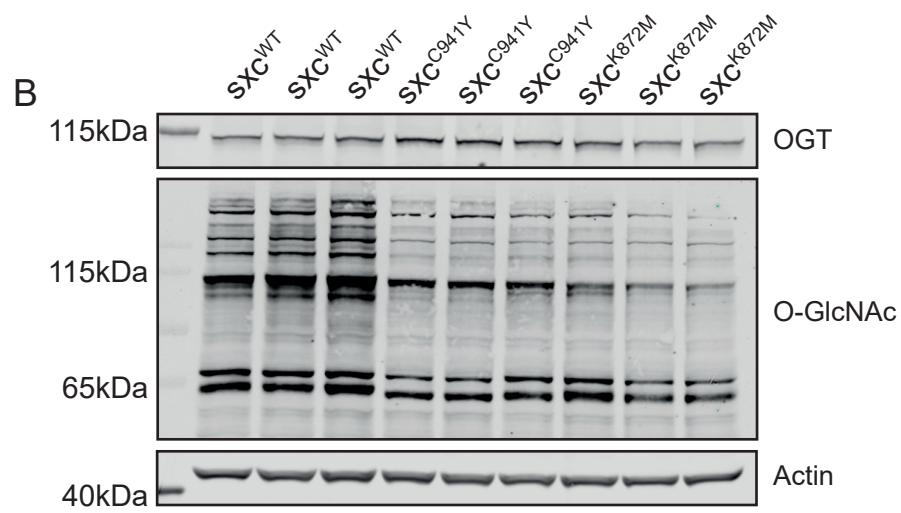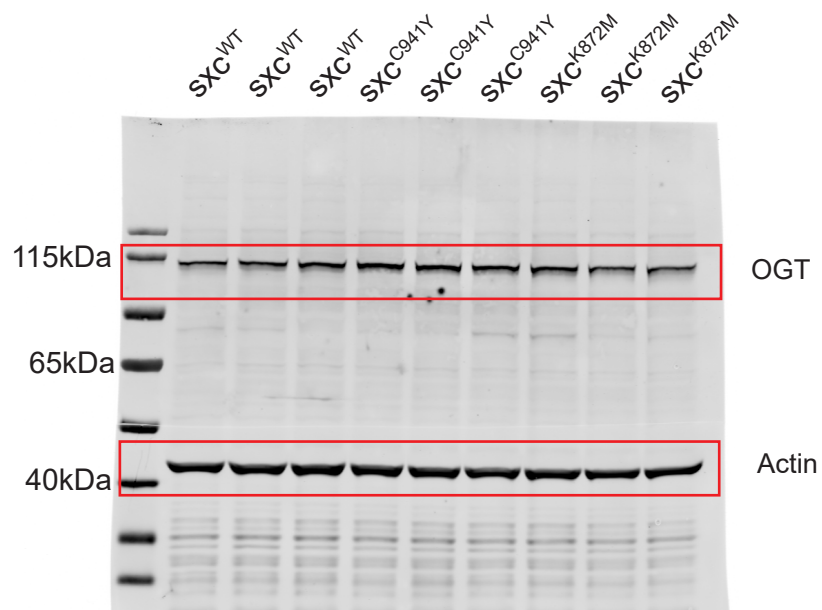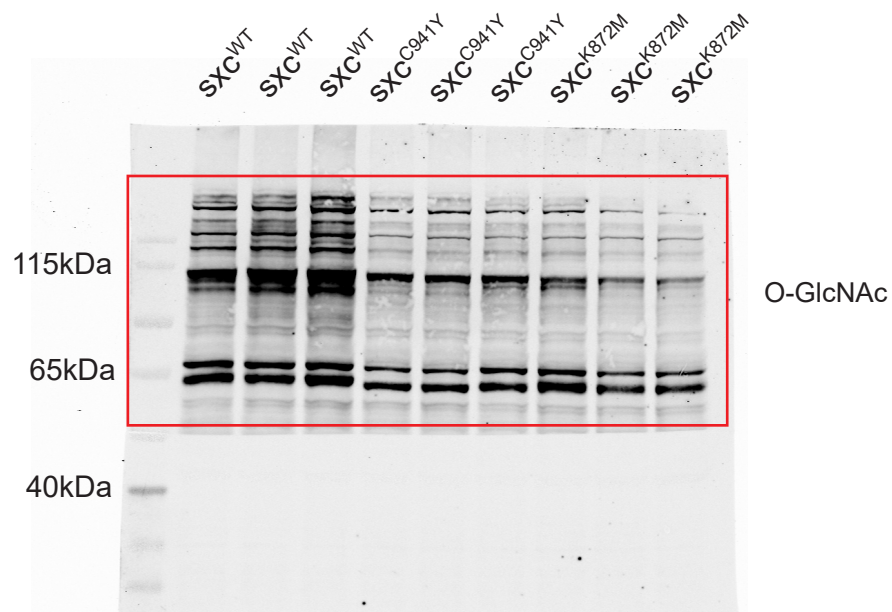

Supplement: supp [file elife-90376-supp-v1.zip]

C

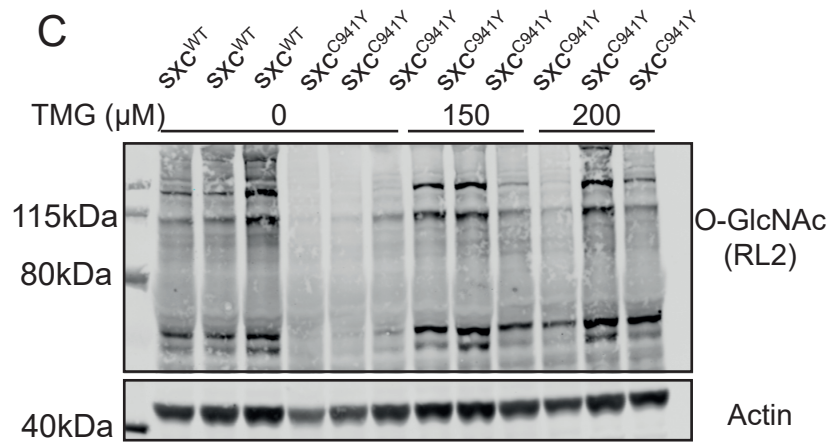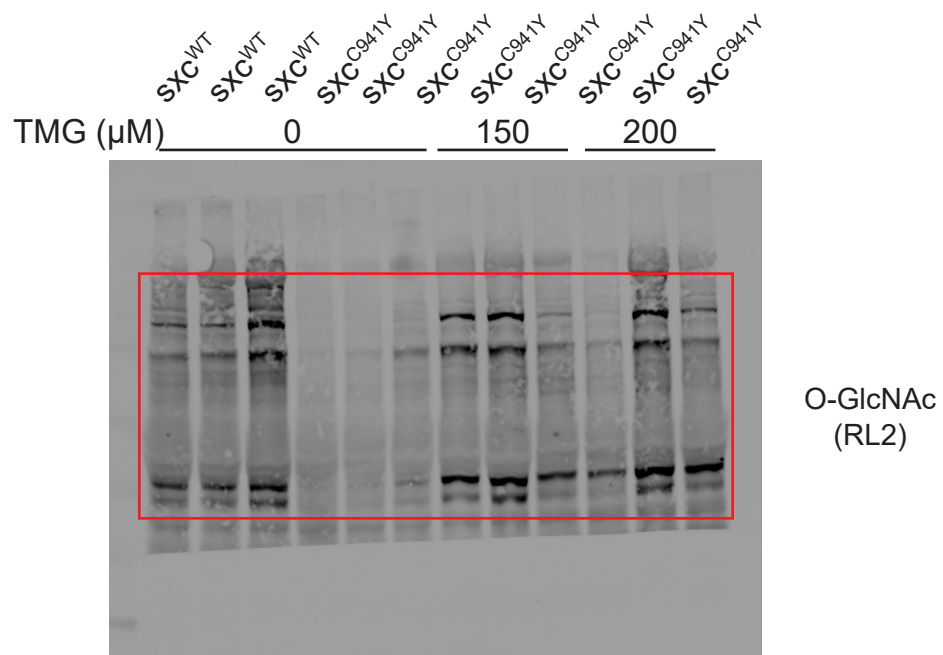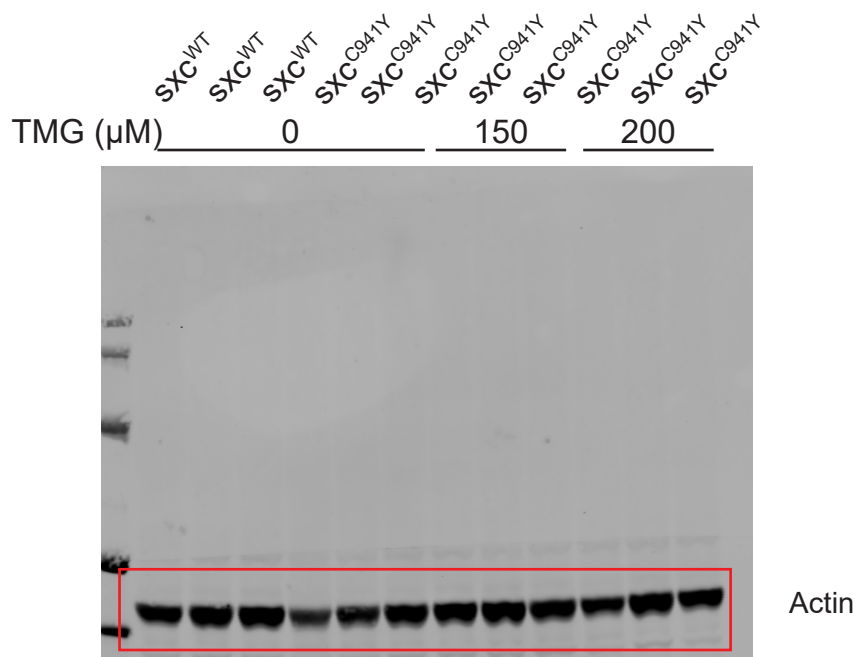

Supplement: supp [file elife-90376-supp-v1.zip]

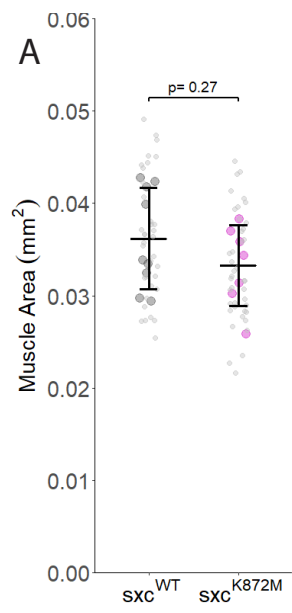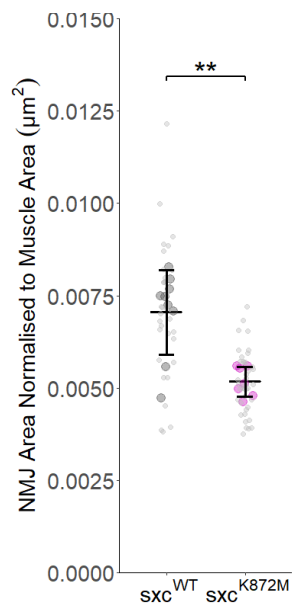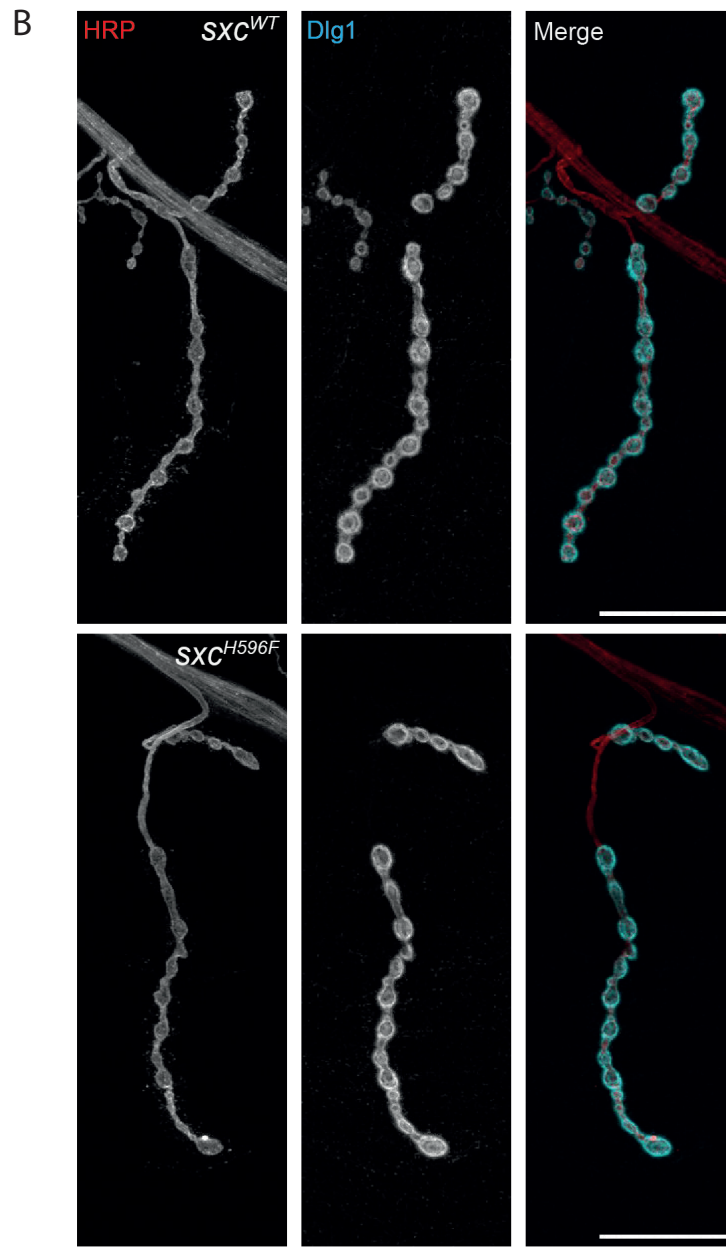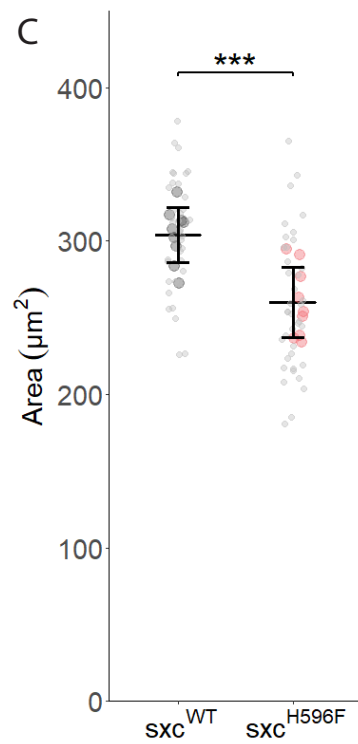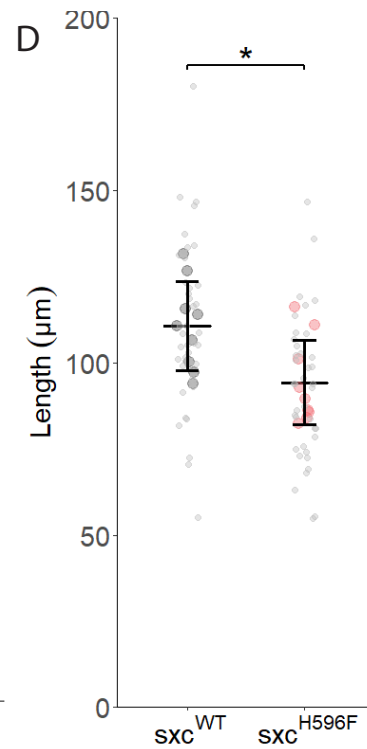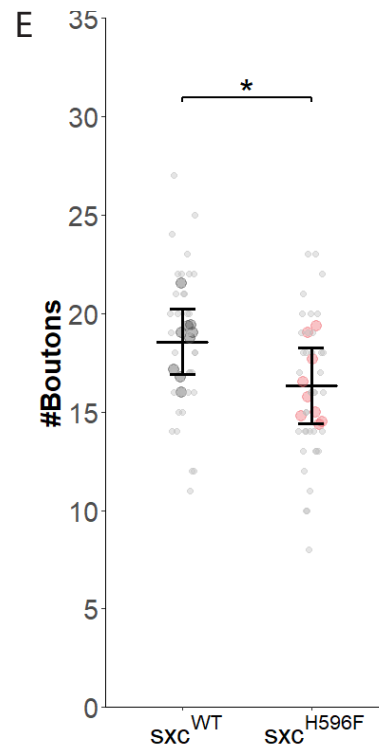

Supplement: supp [file elife-90376-supp-v1.zip]

A

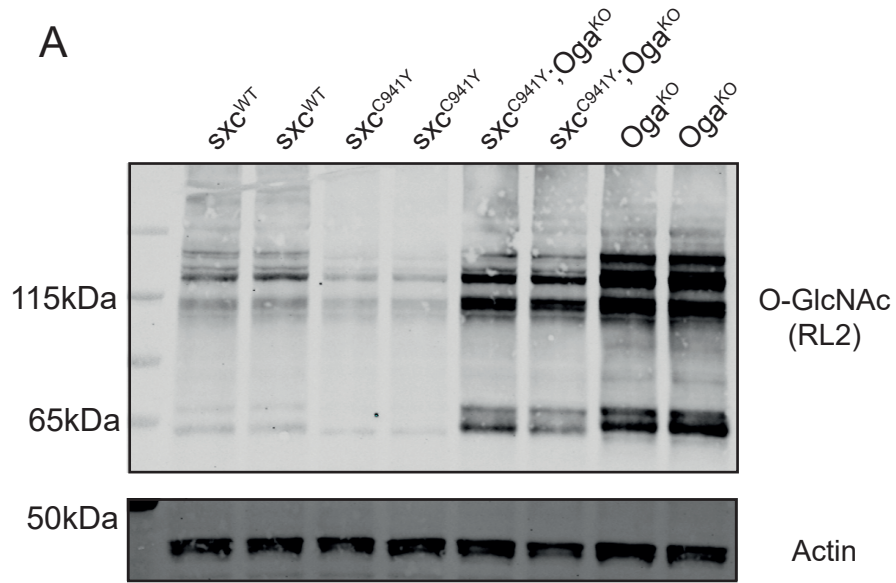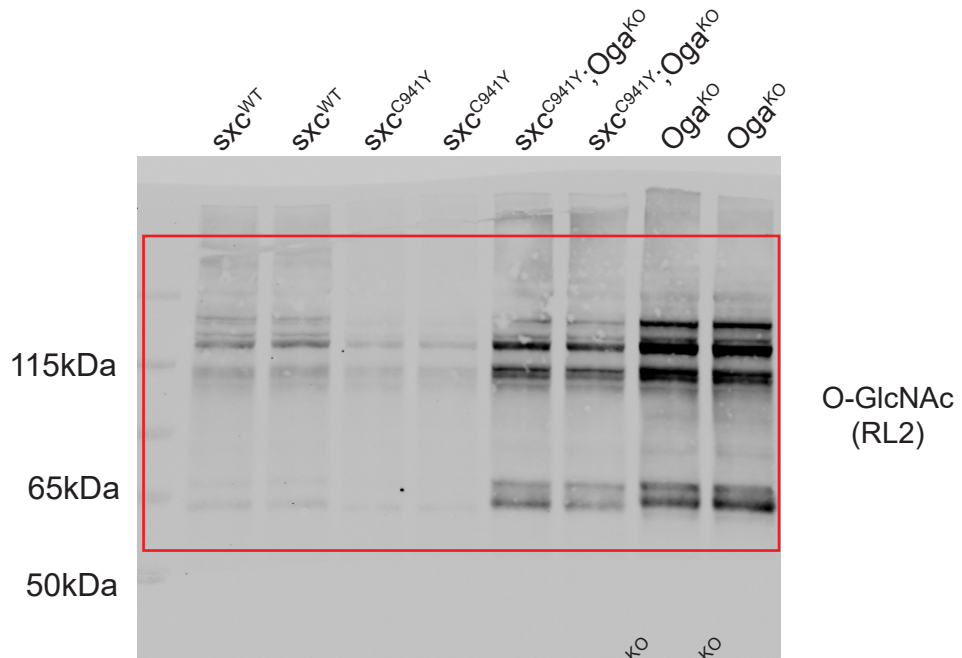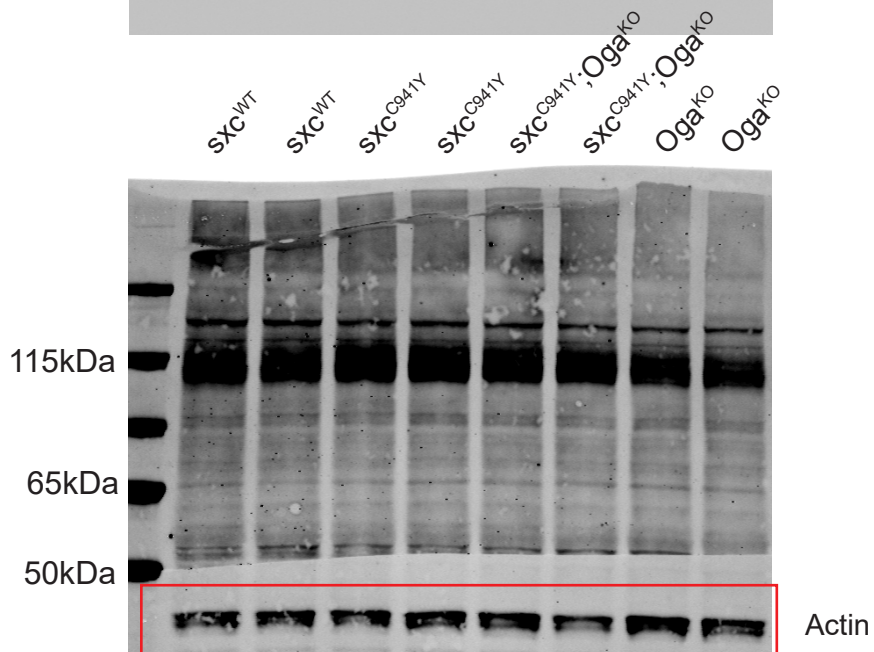

Supplement: supp [file elife-90376-supp-v1.zip]

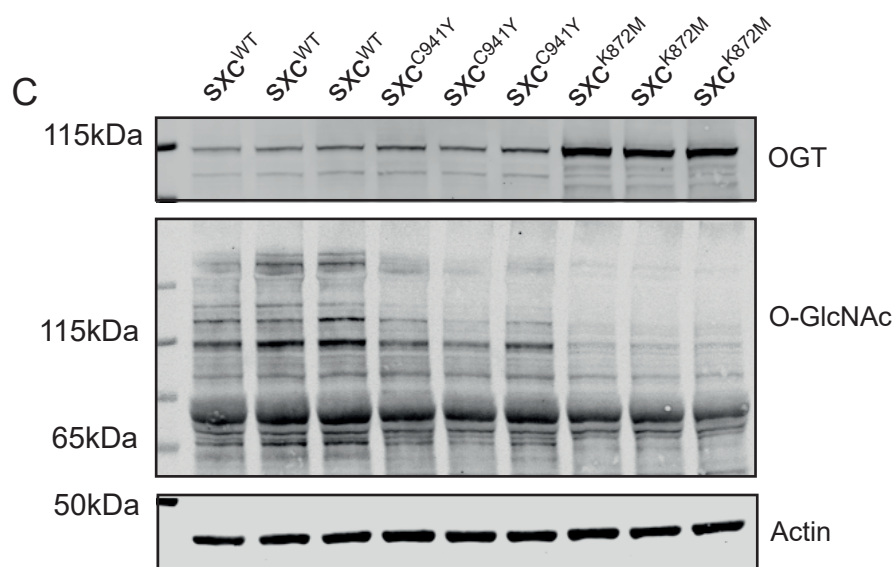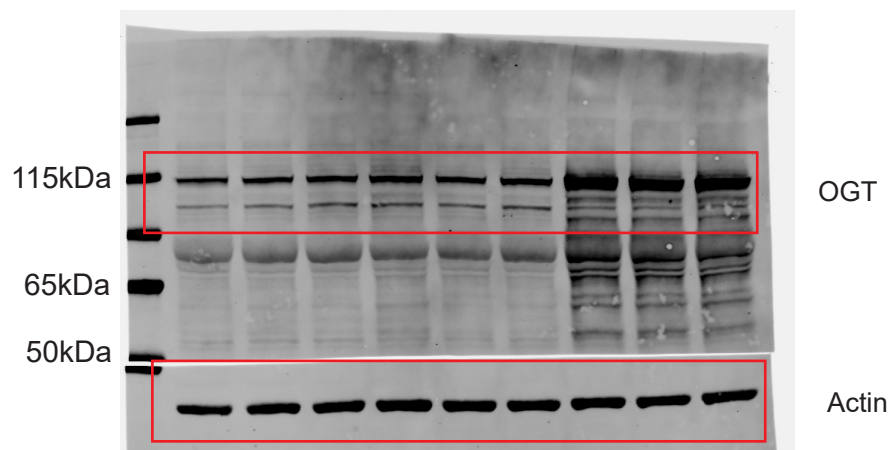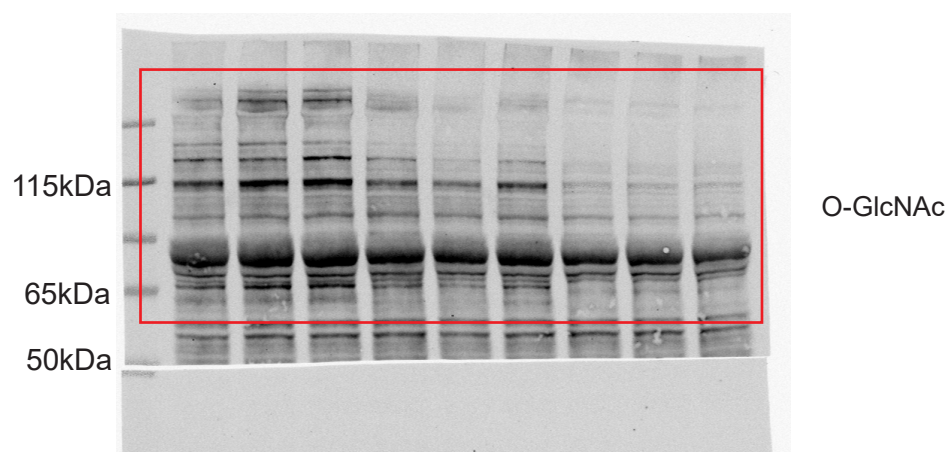

Supplement: supp [file elife-90376-supp-v1.zip]

A *elav>Gal4*

*elav>sx*

*mhc>Gal4*

*mhc>sx*

*uas:sx*

B

C

D

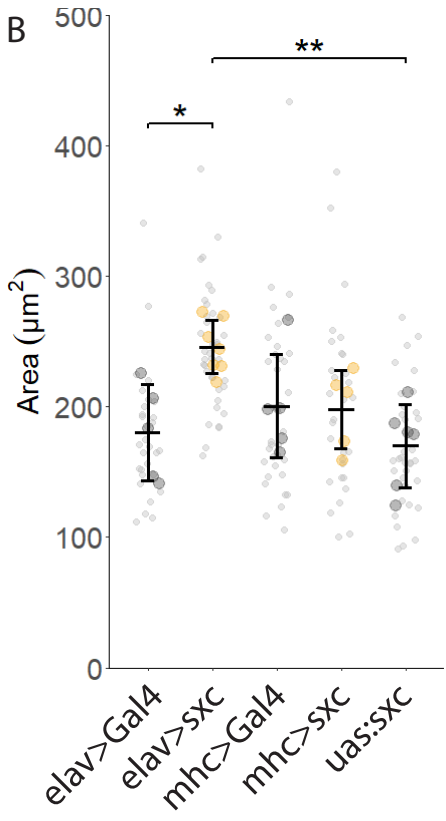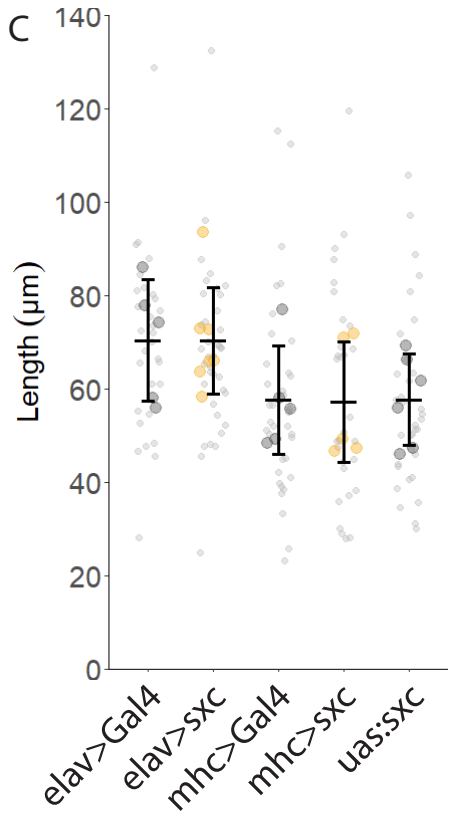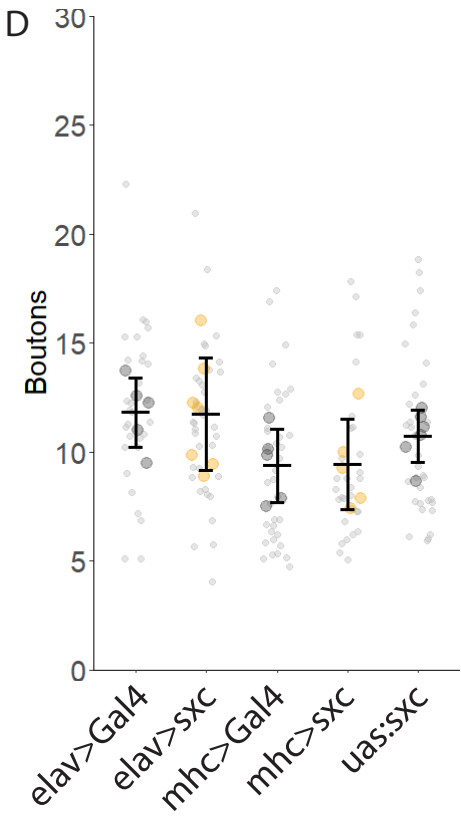

Supplement: supp [file elife-90376-supp-v1.zip]
